# Supplementary material for: Robust, persistent adaptive immune responses to SARS-CoV-2 in the oropharyngeal lymphoid tissue of children
Source: Res Sq. 2022 Mar 23:rs.3.rs-1276578. Preprint. [Version 1] doi: 10.21203/rs.3.rs-1276578/v1 (PMC8963700; doi:10.21203/rs.3.rs-1276578/v1)
Supplement: Supplement 1 [file 075993ffffec17e067dbbf3e.xlsx]

## Sheet: PBMC_CD4
patient_id	status	age	sex	dpi	total.n	cluster_1	cluster_10	cluster_11	cluster_12	cluster_13	cluster_14	cluster_2	cluster_3	cluster_4	cluster_5	cluster_6	cluster_7	cluster_8	cluster_9	cluster_1_freq	cluster_10_freq	cluster_11_freq	cluster_12_freq	cluster_13_freq	cluster_14_freq	cluster_2_freq	cluster_3_freq	cluster_4_freq	cluster_5_freq	cluster_6_freq	cluster_7_freq	cluster_8_freq	cluster_9_freq
102	COVID	6	Male	35	70193	1140	3770	2206	1115	1775	419	12563	18780	8060	4199	2581	4361	7350	1874	0.0162409	0.0537091	0.0314276	0.0158848	0.0252874	0.00596926	0.178978	0.267548	0.114826	0.0598208	0.03677	0.0621287	0.104711	0.0266978
32	COVID	3.6	Female	26	129916	2004	5325	3686	2165	659	0	34469	31731	14790	10930	7220	5971	5250	5716	0.0154254	0.040988	0.0283722	0.0166646	0.00507251	0	0.265318	0.244242	0.113843	0.0841313	0.0555744	0.0459605	0.0404107	0.0439977
50	COVID	2.9	Female	31	7863	76	432	238	130	0	0	2326	1382	810	841	350	732	442	104	0.00966552	0.0549409	0.0302683	0.0165331	0	0	0.295816	0.17576	0.103014	0.106957	0.0445123	0.0930942	0.0562126	0.0132265
69	COVID	3.4	Female	201	170796	635	8093	4279	2526	121	0	40122	44498	17614	16845	12267	10960	6407	6429	0.00371789	0.047384	0.0250533	0.0147896	0.000708448	0	0.234912	0.260533	0.103129	0.0986264	0.0718225	0.0641701	0.0375126	0.0376414
71	COVID	6.2	Female	71	183754	100280	9131	3536	5344	833	0	1307	360	23708	11580	1257	8721	14291	3406	0.54573	0.0496914	0.0192431	0.0290824	0.00453323	0	0.00711277	0.00195914	0.12902	0.063019	0.00684067	0.0474602	0.0777725	0.0185357
89	COVID	12.1	Female	NA	106001	1673	5530	2076	1550	3605	0	28952	9290	14178	5616	15703	2848	12589	2391	0.0157829	0.0521693	0.0195847	0.0146225	0.0340091	0	0.273129	0.0876407	0.133753	0.0529806	0.14814	0.0268677	0.118763	0.0225564
100	COVID	4.7	Female	25	301086	27986	5992	6170	5358	139	0	52389	34056	17906	21812	93989	17802	8212	9275	0.0929502	0.0199013	0.0204925	0.0177956	0.000461662	0	0.174	0.113111	0.0594714	0.0724444	0.312167	0.059126	0.0272746	0.0308052
29	COVID	3.1	Male	NA	222608	2570	4880	5600	1739	185	617	85836	48735	13010	21962	9025	15158	2731	10560	0.011545	0.0219219	0.0251563	0.00781194	0.000831057	0.00277169	0.385593	0.218927	0.0584435	0.0986577	0.0405421	0.0680928	0.0122682	0.0474376
46	COVID	7.2	Male	NA	173746	84854	14628	3028	7353	2426	0	315	1804	20155	7100	4033	10099	13126	4825	0.48838	0.0841919	0.0174277	0.0423204	0.0139629	0	0.00181299	0.010383	0.116003	0.0408643	0.023212	0.0581251	0.0755471	0.0277704
70	COVID	16.4	Male	98	157113	317	10326	3065	2914	0	0	27895	48825	21195	10548	6303	9437	14078	2210	0.00201766	0.0657234	0.0195083	0.0185472	0	0	0.177547	0.310764	0.134903	0.0671364	0.0401176	0.060065	0.0896043	0.0140663
87	COVID	6	Male	NA	161725	11826	7680	4084	2286	5279	0	32772	34535	16045	10995	13830	8386	8941	5066	0.0731241	0.047488	0.0252527	0.0141351	0.0326418	0	0.20264	0.213542	0.0992116	0.0679858	0.0855155	0.0518535	0.0552852	0.0313248
91	COVID	9.2	Male	NA	250638	493	24649	4106	4639	8413	2437	63630	15631	21417	15846	44722	12799	27919	3937	0.00196698	0.098345	0.0163822	0.0185088	0.0335663	0.00972319	0.253872	0.0623648	0.0854499	0.0632227	0.178433	0.0510657	0.111392	0.0157079
101	COVID	4.6	Male	NA	70068	1008	3848	1687	935	55	43	21332	8908	10433	4412	6158	6127	3590	1532	0.014386	0.0549181	0.0240766	0.0133442	0.000784952	0.00061369	0.304447	0.127134	0.148898	0.0629674	0.0878861	0.0874436	0.0512359	0.0218645
97	CONTROL	6	Female	NA	146015	1942	6742	4226	2458	0	0	44093	26092	17239	8503	18417	7069	6864	2370	0.0133	0.0461733	0.0289422	0.0168339	0	0	0.301976	0.178694	0.118063	0.0582337	0.126131	0.0484128	0.0470089	0.0162312
96	CONTROL	11.9	Male	NA	137481	548	6545	2038	1845	374	0	40614	22982	19243	6176	12338	11778	10737	2263	0.00398601	0.0476066	0.0148239	0.01342	0.00272038	0	0.295415	0.167165	0.139968	0.0449226	0.0897433	0.08567	0.0780981	0.0164605
28	CONTROL	4.3	Female	NA	105965	331	8300	3026	3093	4752	0	23748	15523	16448	9732	4554	6309	8160	1989	0.00312367	0.0783277	0.0285566	0.0291889	0.044845	0	0.224112	0.146492	0.155221	0.0918416	0.0429765	0.0595385	0.0770066	0.0187703
31	CONTROL	11.2	Female	NA	228712	565	5608	3374	4052	276	345	80694	63179	13844	12427	12057	8509	9478	14304	0.00247036	0.0245199	0.0147522	0.0177166	0.00120676	0.00150845	0.352819	0.276238	0.0605303	0.0543347	0.052717	0.037204	0.0414408	0.0625415
34	CONTROL	13.8	Male	NA	29136	14397	2352	450	1160	388	0	106	431	3547	1200	589	1716	2010	790	0.494131	0.0807249	0.0154448	0.0398133	0.0133169	0	0.00363811	0.0147927	0.121739	0.0411862	0.0202155	0.0588962	0.0689868	0.0271142
35	CONTROL	18	Female	NA	241057	218	19940	2881	4624	7869	0	23217	77283	34738	6401	1478	16690	41617	4101	0.00090435	0.082719	0.0119515	0.0191822	0.0326437	0	0.0963133	0.320601	0.144107	0.0265539	0.00613133	0.0692367	0.172644	0.0170126
45	CONTROL	4.3	Female	NA	163923	97167	3403	3209	3343	699	0	760	1497	12685	8013	11335	7838	9201	4773	0.59276	0.0207597	0.0195763	0.0203937	0.0042642	0	0.00463632	0.00913234	0.0773839	0.0488827	0.0691483	0.0478151	0.05613	0.0291173
54	CONTROL	2.3	Female	NA	303787	2842	5808	4579	2102	0	4305	139069	81916	14372	8370	8738	15336	4780	11570	0.00935524	0.0191187	0.0150731	0.00691932	0	0.0141711	0.457785	0.269649	0.0473095	0.0275522	0.0287636	0.0504827	0.0157347	0.0380859
56	CONTROL	2.6	Female	NA	401929	12765	8384	4074	5236	0	5047	110483	140143	19996	20070	26855	26381	7897	14598	0.0317593	0.0208594	0.0101361	0.0130272	0	0.0125569	0.274882	0.348676	0.0497501	0.0499342	0.0668153	0.065636	0.0196477	0.0363198
64	CONTROL	3	Female	NA	195354	118549	5980	3932	2154	2820	0	1453	0	16878	16095	870	9183	7060	10380	0.606842	0.0306111	0.0201276	0.0110261	0.0144353	0	0.00743778	0	0.086397	0.0823889	0.00445345	0.047007	0.0361395	0.0531343
72	CONTROL	7.7	Female	NA	194754	116073	9681	3014	2496	542	0	2058	1701	18253	14904	4889	5568	9602	5973	0.595998	0.0497089	0.0154759	0.0128162	0.002783	0	0.0105672	0.0087341	0.0937234	0.0765273	0.0251035	0.0285899	0.0493032	0.0306695
77	CONTROL	9.6	Female	NA	175992	8102	10736	3196	5464	2275	0	22485	24103	27765	8512	38804	6871	15329	2350	0.0460362	0.0610028	0.0181599	0.0310469	0.0129267	0	0.127761	0.136955	0.157763	0.0483658	0.220487	0.0390415	0.0871006	0.0133529
81	CONTROL	3.4	Female	NA	269080	39318	10669	2958	4499	0	4232	48422	62873	15705	15776	32214	20772	8737	2905	0.14612	0.0396499	0.010993	0.0167199	0	0.0157277	0.179954	0.233659	0.0583655	0.0586294	0.119719	0.0771964	0.0324699	0.010796
83	CONTROL	3.7	Female	NA	164947	2390	6355	2921	2745	2306	0	28416	24357	11040	8044	56720	6975	6071	6607	0.0144895	0.0385275	0.0177087	0.0166417	0.0139802	0	0.172274	0.147666	0.0669306	0.0487672	0.343868	0.0422863	0.0368058	0.0400553
85	CONTROL	5.1	Female	NA	244726	5187	7090	4549	2646	0	6910	52891	26431	12659	11369	79586	12866	5526	17016	0.0211951	0.0289712	0.0185881	0.0108121	0	0.0282357	0.216123	0.108002	0.0517272	0.046456	0.325205	0.0525731	0.0225804	0.0695308
98	CONTROL	2.8	Female	NA	105679	1989	2676	2255	1061	93	5309	25206	15319	5587	5826	28477	4655	2409	4817	0.0188211	0.025322	0.0213382	0.0100398	0.000880023	0.050237	0.238515	0.144958	0.0528676	0.0551292	0.269467	0.0440485	0.0227954	0.0455814
36	CONTROL	12	Male	NA	185952	1325	12603	3051	5734	153	143	25341	63819	21985	11537	14230	8459	16002	1570	0.00712549	0.0677756	0.0164075	0.0308359	0.000822793	0.000769016	0.136277	0.343201	0.118229	0.0620429	0.0765251	0.0454902	0.0860545	0.00844304
44	CONTROL	4.6	Male	NA	200374	126127	5081	1611	4215	0	0	2912	1970	17172	10413	901	12615	7805	9552	0.629458	0.0253576	0.00803997	0.0210357	0	0	0.0145328	0.00983161	0.0856997	0.0519678	0.00449659	0.0629573	0.0389522	0.0476709
48	CONTROL	10.9	Male	NA	288796	135208	13975	6652	5852	291	0	9326	19940	30694	19684	4401	9163	28571	5039	0.468178	0.0483906	0.0230336	0.0202634	0.00100763	0	0.0322927	0.0690453	0.106283	0.0681588	0.0152391	0.0317283	0.0989314	0.0174483
49	CONTROL	2.7	Male	NA	281885	162520	5079	5567	3350	1511	0	8867	20367	15905	17475	10601	10628	7932	12083	0.576547	0.018018	0.0197492	0.0118843	0.00536034	0	0.0314561	0.0722529	0.0564237	0.0619934	0.0376075	0.0377033	0.0281391	0.042865
51	CONTROL	5.7	Male	NA	11289	170	552	350	192	214	0	2431	2973	1227	848	547	890	693	202	0.0150589	0.0488972	0.0310036	0.0170077	0.0189565	0	0.215342	0.263354	0.10869	0.0751174	0.0484542	0.0788378	0.0613872	0.0178935
52	CONTROL	14.1	Male	NA	18451	21	1611	304	565	1486	0	2217	2978	3413	822	196	927	3738	173	0.00113815	0.0873123	0.0164761	0.0306216	0.0805376	0	0.120156	0.1614	0.184976	0.0445504	0.0106227	0.0502412	0.202591	0.00937619
55	CONTROL	10.7	Male	NA	242750	2949	10698	3641	5733	622	285	55892	55622	30622	10305	21824	12971	23758	7828	0.0121483	0.04407	0.014999	0.0236169	0.00256231	0.00117405	0.230245	0.229133	0.126146	0.0424511	0.0899032	0.0534336	0.0978702	0.0322472
57	CONTROL	3.2	Male	NA	182540	1222	4904	2492	5317	0	234	64672	36881	9563	10907	21946	9935	5762	8705	0.00669442	0.0268653	0.0136518	0.0291279	0	0.00128191	0.354289	0.202043	0.0523885	0.0597513	0.120226	0.0544264	0.0315657	0.0476882
63	CONTROL	6.9	Male	NA	113825	21435	9328	4215	6086	11567	0	298	719	23463	8504	1754	4724	18305	3427	0.188315	0.0819504	0.0370305	0.053468	0.101621	0	0.00261805	0.00631671	0.206132	0.0747112	0.0154096	0.0415023	0.160817	0.0301076
65	CONTROL	4.5	Male	NA	93899	50188	6147	2076	1950	54	797	1941	1198	8760	6838	958	2779	7223	2990	0.534489	0.065464	0.0221089	0.020767	0.000575086	0.00848784	0.0206711	0.0127584	0.0932917	0.0728229	0.0102025	0.0295956	0.0769231	0.0318427
73	CONTROL	5.8	Male	NA	149407	80941	8274	2428	3115	388	0	8910	561	13399	7014	1556	7256	8211	7354	0.541748	0.0553789	0.0162509	0.0208491	0.00259693	0	0.0596358	0.00375484	0.0896812	0.0469456	0.0104145	0.0485653	0.0549573	0.0492213
74	CONTROL	14.6	Male	NA	176755	74874	17007	1771	6338	163	0	3972	0	22979	7384	571	8708	26586	6402	0.423603	0.0962179	0.0100195	0.0358575	0.00092218	0	0.0224718	0	0.130005	0.0417753	0.00323046	0.0492659	0.150412	0.0362196
82	CONTROL	6.9	Male	NA	43817	12273	3056	922	2067	105	184	4363	509	6264	3276	2405	2836	4351	1206	0.280097	0.0697446	0.0210421	0.0471735	0.00239633	0.00419928	0.0995732	0.0116165	0.142958	0.0747655	0.0548874	0.0647237	0.0992994	0.0275236
84	CONTROL	3.2	Male	NA	212462	2458	4783	2271	5245	0	0	65070	34266	7114	11351	62486	10821	2146	4451	0.0115691	0.0225123	0.010689	0.0246868	0	0	0.306267	0.161281	0.0334836	0.053426	0.294104	0.0509315	0.0101006	0.0209496
90	CONTROL	3.1	Male	NA	171452	1498	6259	3167	2133	2981	5094	44134	20467	18094	8110	37857	8774	6281	6603	0.00873714	0.0365058	0.0184716	0.0124408	0.0173868	0.0297109	0.257413	0.119375	0.105534	0.0473019	0.220802	0.0511747	0.0366342	0.0385122
94	CONTROL	3	Male	NA	104949	6911	2918	1624	1302	0	4614	26638	25777	3043	5297	13915	4502	2183	6225	0.065851	0.027804	0.0154742	0.012406	0	0.0439642	0.253819	0.245615	0.028995	0.0504721	0.132588	0.042897	0.0208006	0.0593145
95	CONTROL	3.3	Male	NA	81785	6552	1083	901	994	462	4261	12419	19884	3803	4029	14369	3610	1967	7451	0.0801125	0.013242	0.0110167	0.0121538	0.00564896	0.0521	0.151849	0.243125	0.0465	0.0492633	0.175692	0.0441401	0.0240509	0.0911047
99	CONTROL	7.1	Male	NA	61226	664	3321	1963	2067	29	471	14907	7763	7928	3710	6969	4796	5325	1313	0.0108451	0.0542417	0.0320615	0.0337602	0.000473655	0.00769281	0.243475	0.126793	0.129487	0.0605952	0.113824	0.0783327	0.0869729	0.0214451

## Sheet: PBMC_CD8
patient_id	status	age	sex	dpi	total.n	cluster_1	cluster_10	cluster_11	cluster_12	cluster_2	cluster_3	cluster_4	cluster_5	cluster_6	cluster_7	cluster_8	cluster_9	cluster_1_freq	cluster_10_freq	cluster_11_freq	cluster_12_freq	cluster_2_freq	cluster_3_freq	cluster_4_freq	cluster_5_freq	cluster_6_freq	cluster_7_freq	cluster_8_freq	cluster_9_freq
102	COVID	6	Male	35	45709	299	2081	3328	452	3530	7699	7615	6674	1475	5603	4568	2385	0.00654138	0.0455271	0.0728084	0.00988864	0.0772277	0.168435	0.166597	0.146011	0.0322694	0.12258	0.0999366	0.0521779
32	COVID	3.6	Female	26	76769	2337	6750	4316	969	6125	7110	8124	4770	6984	8438	14140	6706	0.030442	0.0879261	0.0562206	0.0126223	0.0797848	0.0926155	0.105824	0.0621345	0.0909742	0.109914	0.184189	0.087353
50	COVID	2.9	Female	31	4477	125	256	230	12	831	332	190	43	326	609	1266	257	0.0279205	0.0571811	0.0513737	0.00268037	0.185615	0.0741568	0.0424391	0.00960465	0.0728166	0.136029	0.282779	0.0574045
69	COVID	3.4	Female	201	151581	5961	936	3230	990	9149	28043	41830	4364	7933	30388	17309	1448	0.0393255	0.00617492	0.0213087	0.00653116	0.0603572	0.185003	0.275958	0.0287899	0.0523351	0.200474	0.11419	0.00955265
71	COVID	6.2	Female	71	106624	30207	4197	4000	2733	12128	4286	266	16269	4852	0	20543	7143	0.283304	0.0393626	0.037515	0.0256321	0.113745	0.0401973	0.00249475	0.152583	0.0455057	0	0.192668	0.0669924
89	COVID	12.1	Female	NA	86032	1432	6273	4369	1785	9310	7780	17711	14588	5965	7133	3310	6376	0.016645	0.0729147	0.0507834	0.0207481	0.108216	0.0904315	0.205865	0.169565	0.0693347	0.082911	0.0384741	0.074112
100	COVID	4.7	Female	25	135376	12664	1032	1932	216	18913	43554	29224	1058	6892	8229	9748	1914	0.0935469	0.00762321	0.0142714	0.00159556	0.139707	0.321726	0.215873	0.00781527	0.0509101	0.0607863	0.0720069	0.0141384
29	COVID	3.1	Male	NA	120546	7619	1988	647	358	11002	18285	24007	9933	5527	32057	7838	1285	0.0632041	0.0164916	0.00536725	0.00296982	0.0912681	0.151685	0.199152	0.0824001	0.0458497	0.265932	0.0650208	0.0106598
46	COVID	7.2	Male	NA	74719	21601	7666	2961	735	2986	5447	590	18598	6516	153	2789	4677	0.289096	0.102598	0.0396285	0.00983686	0.0399631	0.0728998	0.00789625	0.248906	0.0872067	0.00204767	0.0373265	0.0625945
70	COVID	16.4	Male	98	132458	431	6443	11180	578	29155	11102	29119	9351	12518	12296	3052	7233	0.00325386	0.0486418	0.0844041	0.00436365	0.220108	0.0838152	0.219836	0.070596	0.0945054	0.0928294	0.0230413	0.054606
87	COVID	6	Male	NA	124769	3577	3167	1361	2296	11089	18547	24606	38666	5411	9511	1656	4882	0.028669	0.0253829	0.0109082	0.018402	0.0888762	0.148651	0.197212	0.309901	0.0433681	0.0762289	0.0132725	0.0391283
91	COVID	9.2	Male	NA	137729	7732	6819	3574	1909	18004	7053	22802	28953	12414	18037	3523	6909	0.0561392	0.0495103	0.0259495	0.0138606	0.13072	0.0512093	0.165557	0.210217	0.0901335	0.13096	0.0255792	0.0501637
101	COVID	4.6	Male	NA	48120	703	1806	2032	312	4913	8870	7951	5876	2410	5426	3938	3883	0.0146093	0.0375312	0.0422278	0.00648379	0.102099	0.184331	0.165233	0.122111	0.0500831	0.11276	0.0818371	0.0806941
97	CONTROL	6	Female	NA	96289	1713	3790	3515	643	20359	13502	27298	717	5627	10340	4863	3922	0.0177902	0.0393607	0.0365047	0.00667781	0.211436	0.140224	0.283501	0.00744633	0.0584387	0.107385	0.0505042	0.0407315
96	CONTROL	11.9	Male	NA	94559	406	11006	1663	577	6266	6938	25785	5742	4938	18843	6002	6393	0.00429362	0.116393	0.0175869	0.00610201	0.0662655	0.0733722	0.272687	0.060724	0.0522214	0.199272	0.0634736	0.0676086
28	CONTROL	4.3	Female	NA	81719	992	13591	895	1784	6289	3225	4577	28967	2792	5730	4941	7936	0.0121392	0.166314	0.0109522	0.0218309	0.0769588	0.0394645	0.056009	0.354471	0.0341659	0.0701183	0.0604633	0.0971133
31	CONTROL	11.2	Female	NA	98485	1631	4572	7520	935	22639	9186	9201	2620	3883	22306	7553	6439	0.0165609	0.0464233	0.0763568	0.00949383	0.229873	0.0932731	0.0934254	0.026603	0.0394273	0.226491	0.0766919	0.0653805
34	CONTROL	13.8	Male	NA	12410	3541	1244	491	145	498	964	28	3109	1102	44	469	775	0.285334	0.100242	0.0395649	0.0116841	0.0401289	0.0776793	0.00225624	0.250524	0.0887994	0.00354553	0.0377921	0.0624496
35	CONTROL	18	Female	NA	76496	313	1597	1827	1264	8709	2333	30250	2436	11267	8307	1985	6208	0.00409172	0.0208769	0.0238836	0.0165237	0.113849	0.0304983	0.395446	0.0318448	0.147289	0.108594	0.0259491	0.0811546
45	CONTROL	4.3	Female	NA	71040	18131	3978	1646	1178	9648	8850	0	14815	3713	193	5007	3881	0.255222	0.0559966	0.02317	0.0165822	0.135811	0.124578	0	0.208544	0.0522663	0.00271678	0.0704814	0.0546312
54	CONTROL	2.3	Female	NA	134142	1914	1201	773	185	20150	16897	18615	800	9155	45443	16820	2189	0.0142685	0.0089532	0.00576255	0.00137914	0.150214	0.125964	0.138771	0.00596383	0.0682486	0.338768	0.12539	0.0163185
56	CONTROL	2.6	Female	NA	176324	4946	2647	3962	142	42595	37999	28825	800	4103	29355	17101	3849	0.0280506	0.0150121	0.02247	0.000805336	0.241572	0.215507	0.163477	0.0045371	0.0232697	0.166483	0.0969862	0.0218291
64	CONTROL	3	Female	NA	92658	36317	8605	1776	686	8952	4318	243	15638	6513	0	6119	3491	0.391947	0.0928684	0.0191673	0.00740357	0.0966134	0.0466015	0.00262255	0.168771	0.0702907	0	0.0660386	0.0376762
72	CONTROL	7.7	Female	NA	72134	37892	2658	4367	242	6500	5278	0	865	6955	125	4116	3136	0.5253	0.0368481	0.0605401	0.00335487	0.0901101	0.0731694	0	0.0119916	0.0964178	0.00173289	0.0570605	0.0434746
77	CONTROL	9.6	Female	NA	103998	966	8066	9350	1769	15074	12936	9021	25878	5474	1982	7361	6121	0.00928864	0.0775592	0.0899056	0.0170099	0.144945	0.124387	0.0867421	0.248832	0.0526356	0.0190581	0.0707802	0.0588569
81	CONTROL	3.4	Female	NA	101910	9947	1303	1208	155	23620	31116	9015	10523	4690	5351	3098	1884	0.0976057	0.0127858	0.0118536	0.00152095	0.231773	0.305328	0.0884604	0.103258	0.046021	0.0525071	0.0303994	0.0184869
83	CONTROL	3.7	Female	NA	85466	673	11417	1230	937	3183	12293	10190	25592	2906	2720	6463	7862	0.00787448	0.133585	0.0143917	0.0109634	0.0372429	0.143835	0.119229	0.299441	0.0340018	0.0318255	0.0756207	0.0919898
85	CONTROL	5.1	Female	NA	104955	5049	1302	1272	0	4886	40739	20181	762	4379	15766	9521	1098	0.0481063	0.0124053	0.0121195	0	0.0465533	0.388157	0.192282	0.00726025	0.0417226	0.150217	0.0907151	0.0104616
98	CONTROL	2.8	Female	NA	78090	1264	5449	1205	577	6156	16969	18779	11716	1848	7458	2411	4258	0.0161865	0.0697785	0.0154309	0.00738891	0.0788321	0.217301	0.240479	0.150032	0.023665	0.0955052	0.0308746	0.0545268
36	CONTROL	12	Male	NA	134669	452	10367	10450	694	36856	26359	17033	3521	4960	9904	7394	6679	0.00335638	0.0769813	0.0775977	0.00515338	0.273678	0.195732	0.12648	0.0261456	0.036831	0.0735433	0.054905	0.0495957
44	CONTROL	4.6	Male	NA	140834	45649	668	6804	134	34406	17464	3975	133	6464	107	21614	3416	0.324133	0.00474317	0.0483122	0.000951475	0.244302	0.124004	0.0282247	0.000944374	0.045898	0.00075976	0.153471	0.0242555
48	CONTROL	10.9	Male	NA	85158	28310	5243	3602	3098	8455	9645	1321	7452	6278	1613	4015	6126	0.332441	0.0615679	0.0422978	0.0363794	0.099286	0.11326	0.0155123	0.0875079	0.0737218	0.0189413	0.0471477	0.0719369
49	CONTROL	2.7	Male	NA	111180	28356	10084	1781	868	6668	8450	928	32504	6558	1836	3832	9315	0.255046	0.0906998	0.0160191	0.00780716	0.0599748	0.0760029	0.00834682	0.292355	0.0589854	0.0165138	0.0344666	0.0837831
51	CONTROL	5.7	Male	NA	12779	30	1279	651	137	856	658	1388	4795	799	874	939	373	0.0023476	0.100086	0.050943	0.0107207	0.0669849	0.0514907	0.108616	0.375225	0.0625245	0.0683935	0.0734799	0.0291885
52	CONTROL	14.1	Male	NA	10618	4	582	497	230	687	722	2276	1316	827	2463	284	730	0.000376719	0.0548126	0.0468073	0.0216613	0.0647015	0.0679977	0.214353	0.12394	0.0778866	0.231965	0.026747	0.0687512
55	CONTROL	10.7	Male	NA	120864	495	8381	8571	2534	13154	15804	22667	3091	9974	13136	9346	13711	0.00409551	0.0693424	0.0709144	0.0209657	0.108833	0.130759	0.187541	0.0255742	0.0825225	0.108684	0.0773266	0.113442
57	CONTROL	3.2	Male	NA	80281	2786	2737	6700	105	7467	10085	18409	770	1522	15308	13193	1199	0.0347031	0.0340927	0.0834569	0.00130791	0.0930108	0.125621	0.229307	0.00959131	0.0189584	0.19068	0.164335	0.014935
63	CONTROL	6.9	Male	NA	103388	25816	15388	2149	1263	1468	4807	0	31585	5300	0	1854	13758	0.2497	0.148837	0.0207858	0.0122161	0.0141989	0.0464948	0	0.3055	0.0512632	0	0.0179324	0.133072
65	CONTROL	4.5	Male	NA	50042	23384	501	1300	200	10087	3971	0	143	4133	206	4139	1978	0.467287	0.0100116	0.0259782	0.00399664	0.201571	0.0793533	0	0.0028576	0.0825906	0.00411654	0.0827105	0.0395268
73	CONTROL	5.8	Male	NA	98766	51168	8702	3197	314	6638	5827	495	1118	5983	1800	8981	4543	0.518073	0.0881072	0.0323694	0.00317923	0.0672094	0.058998	0.00501185	0.0113197	0.0605775	0.0182249	0.0909321	0.0459976
74	CONTROL	14.6	Male	NA	132121	93887	5287	10229	235	3919	1655	0	1991	7368	1316	3434	2800	0.710614	0.0400163	0.0774215	0.00177867	0.0296622	0.0125264	0	0.0150695	0.0557671	0.00996057	0.0259913	0.0211927
82	CONTROL	6.9	Male	NA	37596	8116	2247	1874	925	2600	2432	1850	1742	2354	1770	4143	7543	0.215874	0.059767	0.0498457	0.0246037	0.0691563	0.0646877	0.0492074	0.0463347	0.062613	0.0470795	0.110198	0.200633
84	CONTROL	3.2	Male	NA	61827	1158	220	320	177	16494	17294	12909	78	1621	5905	5042	609	0.0187297	0.00355832	0.00517573	0.00286283	0.266777	0.279716	0.208792	0.00126158	0.0262183	0.0955084	0.0815501	0.00985007
90	CONTROL	3.1	Male	NA	72612	778	1312	614	638	6849	16337	16526	11148	2870	7113	6136	2291	0.0107145	0.0180686	0.0084559	0.00878643	0.0943233	0.22499	0.227593	0.153528	0.0395251	0.097959	0.0845039	0.0315513
94	CONTROL	3	Male	NA	40567	2097	356	1529	23	13138	6693	5459	87	1461	5486	3692	546	0.0516923	0.00877561	0.0376907	0.000566963	0.323859	0.164986	0.134568	0.0021446	0.0360145	0.135233	0.0910099	0.0134592
95	CONTROL	3.3	Male	NA	40296	2570	2079	2138	345	1028	11937	5448	7029	780	3261	2651	1030	0.063778	0.0515932	0.0530574	0.00856164	0.0255112	0.296233	0.1352	0.174434	0.0193568	0.0809261	0.0657882	0.0255608
99	CONTROL	7.1	Male	NA	50597	1048	724	3845	295	6968	6118	10449	258	3804	5096	6075	5917	0.0207127	0.0143091	0.0759926	0.00583039	0.137716	0.120916	0.206514	0.00509912	0.0751823	0.100717	0.120066	0.116944

## Sheet: PBMC_B
patient_id	status	age	sex	dpi	total.n	cluster_1	cluster_10	cluster_11	cluster_12	cluster_13	cluster_2	cluster_3	cluster_4	cluster_5	cluster_6	cluster_7	cluster_8	cluster_9	cluster_1_freq	cluster_10_freq	cluster_11_freq	cluster_12_freq	cluster_13_freq	cluster_2_freq	cluster_3_freq	cluster_4_freq	cluster_5_freq	cluster_6_freq	cluster_7_freq	cluster_8_freq	cluster_9_freq
29	COVID	3.1	Male	NA	108301	10311	1537	1319	275	257	11416	12159	15539	8328	21059	12478	12071	1552	0.0952069	0.0141919	0.012179	0.00253922	0.00237302	0.10541	0.11227	0.14348	0.0768968	0.194449	0.115216	0.111458	0.0143304
32	COVID	3.6	Female	26	80267	11963	1472	567	646	179	10985	8317	10361	8377	13201	3940	7740	2519	0.14904	0.0183388	0.00706392	0.00804814	0.00223006	0.136856	0.103617	0.129082	0.104364	0.164464	0.0490862	0.0964282	0.0313828
41	COVID	6	Female	NA	76739	12996	1529	777	417	579	14897	7494	9293	5146	12657	3471	6220	1263	0.169353	0.0199247	0.0101252	0.005434	0.00754506	0.194126	0.0976557	0.121099	0.0670585	0.164936	0.0452312	0.081054	0.0164584
46	COVID	7.2	Male	NA	47196	28519	809	245	526	77	6159	1286	1240	3563	1964	607	190	2011	0.604267	0.0171413	0.00519112	0.011145	0.00163149	0.130498	0.0272481	0.0262734	0.0754937	0.0416137	0.0128613	0.00402576	0.0426095
50	COVID	2.9	Female	31	9223	1143	102	25	12	36	1537	775	1482	417	1860	722	973	139	0.123929	0.0110593	0.00271061	0.0013011	0.00390329	0.166649	0.0840291	0.160685	0.0452131	0.20167	0.0782826	0.105497	0.015071
69	COVID	3.4	Female	201	116672	14989	3300	851	824	242	15239	10586	18408	18071	16464	6322	5232	6144	0.128471	0.0282844	0.00729395	0.00706253	0.00207419	0.130614	0.090733	0.157776	0.154887	0.141114	0.0541861	0.0448437	0.0526604
70	COVID	16.4	Male	98	70364	9563	2903	908	353	36	4126	3872	6583	10286	15213	11233	1649	3639	0.135908	0.0412569	0.0129043	0.00501677	0.000511625	0.0586379	0.0550281	0.0935564	0.146183	0.216204	0.159641	0.0234353	0.0517168
71	COVID	6.2	Female	71	86310	35323	2026	706	909	60	7562	6446	6455	9601	9419	4162	1052	2589	0.409257	0.0234735	0.00817982	0.0105318	0.000695169	0.0876144	0.0746843	0.0747886	0.111239	0.10913	0.0482215	0.0121886	0.0299965
87	COVID	6	Male	NA	28710	3592	639	103	82	441	2853	2341	5946	2425	1982	5181	2366	759	0.125113	0.0222571	0.0035876	0.00285615	0.0153605	0.099373	0.0815395	0.207106	0.0844653	0.0690352	0.18046	0.0824103	0.0264368
89	COVID	12.1	Female	NA	23332	1919	354	153	105	69	3812	2369	3453	1961	2853	4227	1594	463	0.0822476	0.0151723	0.00655752	0.00450026	0.00295731	0.163381	0.101534	0.147994	0.0840477	0.122278	0.181167	0.0683182	0.019844
91	COVID	9.2	Male	NA	52903	13446	1370	377	503	143	5181	1590	10376	1250	13801	3062	1124	680	0.254163	0.0258965	0.00712625	0.00950797	0.00270306	0.097934	0.030055	0.196133	0.0236281	0.260874	0.0578795	0.0212464	0.0128537
100	COVID	4.7	Female	25	73944	8096	251	0	1827	38	6864	6497	7470	14960	4403	15949	5114	2475	0.109488	0.00339446	0	0.0247079	0.000513902	0.092827	0.0878638	0.101022	0.202315	0.0595451	0.21569	0.0691604	0.0334713
101	COVID	4.6	Male	NA	28963	2598	396	65	82	20	2763	3770	2774	3846	2179	6511	3166	793	0.0897007	0.0136726	0.00224424	0.0028312	0.000690536	0.0953976	0.130166	0.0957774	0.13279	0.0752339	0.224804	0.109312	0.0273798
102	COVID	6	Male	35	25518	4353	731	0	292	147	2514	2483	2200	7306	1451	1298	615	2128	0.170585	0.0286464	0	0.0114429	0.00576064	0.0985187	0.0973039	0.0862137	0.286308	0.0568618	0.0508661	0.0241006	0.0833921
28	CONTROL	4.3	Female	NA	50462	5009	1401	458	158	291	6315	5765	7063	6583	6638	4785	3985	2011	0.0992628	0.0277635	0.00907614	0.00313107	0.00576672	0.125144	0.114244	0.139967	0.130455	0.131545	0.0948238	0.0789703	0.0398518
31	CONTROL	11.2	Female	NA	36154	5069	2133	259	95	30	2992	2603	6202	4552	7203	1905	1403	1708	0.140206	0.0589976	0.0071638	0.00262765	0.000829784	0.0827571	0.0719976	0.171544	0.125906	0.199231	0.0526913	0.0388062	0.0472424
34	CONTROL	13.8	Male	NA	8581	5415	167	48	93	12	1024	213	179	647	271	145	19	348	0.631045	0.0194616	0.00559375	0.0108379	0.00139844	0.119333	0.0248223	0.02086	0.0753991	0.0315814	0.0168978	0.00221419	0.0405547
35	CONTROL	18	Female	NA	57964	6215	1792	281	430	42	2878	2932	8685	6120	20228	3700	2822	1839	0.107222	0.0309157	0.00484784	0.0074184	0.000724588	0.0496515	0.0505831	0.149834	0.105583	0.348975	0.0638327	0.0486854	0.0317266
36	CONTROL	12	Male	NA	60284	11238	2008	343	542	147	8404	4976	3634	8823	9170	4976	3368	2655	0.186418	0.033309	0.00568974	0.00899078	0.00243846	0.139407	0.0825426	0.0602813	0.146357	0.152113	0.0825426	0.0558689	0.0440415
39	CONTROL	16.1	Male	NA	48392	15725	303	1749	469	98	6448	1754	3030	3931	4152	7180	1776	1777	0.32495	0.00626137	0.0361423	0.00969168	0.00202513	0.133245	0.0362457	0.0626137	0.0812324	0.0857993	0.148372	0.0367003	0.0367209
42	CONTROL	7.6	Female	NA	77899	8244	2010	1473	420	109	12067	4211	8570	8457	18783	7452	3723	2380	0.105829	0.0258026	0.0189091	0.0053916	0.00139925	0.154906	0.0540572	0.110014	0.108564	0.24112	0.0956623	0.0477927	0.0305524
44	CONTROL	4.6	Male	NA	72359	28069	2276	707	596	402	13869	3445	3147	8396	7439	952	1005	2056	0.387913	0.0314543	0.00977073	0.00823671	0.00555563	0.191669	0.0476098	0.0434915	0.116033	0.102807	0.0131566	0.0138891	0.0284139
45	CONTROL	4.3	Female	NA	20087	10326	221	228	237	27	3256	701	1132	828	1692	1104	190	145	0.514064	0.0110021	0.0113506	0.0117987	0.00134415	0.162095	0.0348982	0.0563549	0.0412207	0.0842336	0.0549609	0.00945885	0.0072186
48	CONTROL	10.9	Male	NA	28191	5510	907	223	238	92	2810	1571	2480	3930	4344	3835	463	1788	0.195452	0.0321734	0.00791033	0.00844241	0.00326345	0.0996772	0.055727	0.0879713	0.139406	0.154092	0.136036	0.0164237	0.0634245
49	CONTROL	2.7	Male	NA	54654	18591	675	353	547	139	11227	3990	5860	3237	5367	2498	1271	899	0.340158	0.0123504	0.00645881	0.0100084	0.00254327	0.20542	0.0730047	0.10722	0.0592271	0.0981996	0.0457057	0.0232554	0.0164489
51	CONTROL	5.7	Male	NA	5863	668	154	22	31	16	681	336	697	702	1102	949	313	192	0.113935	0.0262664	0.00375235	0.0052874	0.00272898	0.116152	0.0573085	0.118881	0.119734	0.187958	0.161863	0.0533856	0.0327477
52	CONTROL	14.1	Male	NA	8303	908	188	35	30	22	966	243	1507	266	1768	1778	470	122	0.109358	0.0226424	0.00421534	0.00361315	0.00264964	0.116343	0.0292665	0.181501	0.0320366	0.212935	0.214139	0.056606	0.0146935
54	CONTROL	2.3	Female	NA	88688	17392	2112	1630	372	223	7640	5700	13858	2542	22572	11145	2882	620	0.196103	0.0238138	0.018379	0.00419448	0.00251443	0.0861447	0.0642703	0.156256	0.0286623	0.25451	0.125665	0.0324959	0.0069908
55	CONTROL	10.7	Male	NA	134434	7428	4427	4439	577	117	18522	11214	14095	12524	32405	9567	16216	2903	0.0552539	0.0329307	0.0330199	0.00429207	0.000870316	0.137778	0.0834164	0.104847	0.093161	0.241048	0.071165	0.120624	0.0215942
56	CONTROL	2.6	Female	NA	182725	15329	2735	5084	26475	121	15995	10225	10883	17662	37243	33789	2883	4301	0.0838911	0.0149678	0.0278232	0.14489	0.000662197	0.0875359	0.0559584	0.0595594	0.0966589	0.20382	0.184917	0.0157778	0.0235381
57	CONTROL	3.2	Male	NA	56496	11910	3198	807	326	151	9361	3921	7816	2390	9543	3390	2589	1094	0.210811	0.0566058	0.0142842	0.00577032	0.00267276	0.165693	0.0694031	0.138346	0.0423039	0.168915	0.0600042	0.0458263	0.0193642
63	CONTROL	6.9	Male	NA	52588	22759	1764	850	440	56	6011	5376	1262	8774	1214	1168	679	2235	0.432779	0.0335438	0.0161634	0.00836693	0.00106488	0.114304	0.102229	0.0239979	0.166844	0.0230851	0.0222104	0.0129117	0.0425002
64	CONTROL	3	Female	NA	54647	17362	2229	802	616	59	6435	9643	4392	3599	5037	1403	2000	1070	0.317712	0.0407891	0.014676	0.0112723	0.00107966	0.117756	0.17646	0.0803704	0.0658591	0.0921734	0.0256739	0.0365985	0.0195802
65	CONTROL	4.5	Male	NA	39901	14205	673	395	349	185	6449	2224	4857	2112	6026	904	843	679	0.356006	0.0168667	0.0098995	0.00874665	0.00463648	0.161625	0.055738	0.121726	0.052931	0.151024	0.0226561	0.0211273	0.0170171
72	CONTROL	7.7	Female	NA	78740	34074	2451	421	992	367	8109	5309	4119	5484	10693	4556	252	1913	0.432741	0.0311278	0.00534671	0.0125984	0.00466091	0.102985	0.0674244	0.0523114	0.0696469	0.135801	0.0578613	0.00320041	0.0242951
73	CONTROL	5.8	Male	NA	128431	48311	6278	2678	1343	278	20131	9368	6787	16317	8099	996	2917	4928	0.376163	0.0488823	0.0208517	0.010457	0.00216459	0.156746	0.0729419	0.0528455	0.127049	0.0630611	0.00775514	0.0227126	0.0383708
74	CONTROL	14.6	Male	NA	96730	72353	1030	1182	1435	101	9295	2178	1968	2091	3046	458	216	1377	0.747989	0.0106482	0.0122196	0.0148351	0.00104414	0.0960922	0.0225163	0.0203453	0.0216169	0.0314897	0.00473483	0.00223302	0.0142355
77	CONTROL	9.6	Female	NA	31377	5250	1160	79	145	0	4235	4685	3509	3419	1923	3925	1812	1235	0.16732	0.0369698	0.00251777	0.00462122	0	0.134971	0.149313	0.111834	0.108965	0.0612869	0.125092	0.0577493	0.03936
81	CONTROL	3.4	Female	NA	63034	18242	429	565	773	0	8435	4207	7674	3987	6878	5676	5314	854	0.289399	0.00680585	0.00896342	0.0122632	0	0.133817	0.0667418	0.121744	0.0632516	0.109116	0.0900466	0.0843037	0.0135482
82	CONTROL	6.9	Male	NA	20098	4732	233	270	62	67	3227	1225	1577	2685	2245	2272	615	888	0.235446	0.0115932	0.0134342	0.00308488	0.00333367	0.160563	0.0609513	0.0784655	0.133595	0.111703	0.113046	0.0306001	0.0441835
83	CONTROL	3.7	Female	NA	18519	2976	303	84	85	40	1721	1944	1854	2433	2370	2668	1384	657	0.1607	0.0163616	0.00453588	0.00458988	0.00215994	0.0929316	0.104973	0.100113	0.131379	0.127977	0.144068	0.0747341	0.0354771
84	CONTROL	3.2	Male	NA	30208	2295	934	501	94	0	2271	2375	1471	6827	4544	4131	3132	1633	0.0759733	0.030919	0.016585	0.00311176	0	0.0751788	0.0786216	0.0486957	0.226	0.150424	0.136752	0.103681	0.0540585
85	CONTROL	5.1	Female	NA	72869	4543	2923	2318	416	221	5590	6990	4841	12534	21747	3784	4584	2378	0.0623448	0.0401131	0.0318105	0.00570887	0.00303284	0.076713	0.0959256	0.0664343	0.172007	0.29844	0.0519288	0.0629074	0.0326339
90	CONTROL	3.1	Male	NA	28220	2838	606	381	99	19	2273	1633	6499	2507	5408	3507	1780	670	0.100567	0.0214741	0.0135011	0.00350815	0.000673281	0.0805457	0.0578668	0.230298	0.0888377	0.191637	0.124274	0.0630758	0.023742
94	CONTROL	3	Male	NA	20896	2592	381	543	60	19	3097	1521	3324	1017	2998	2443	2615	286	0.124043	0.0182332	0.0259858	0.00287136	0.000909265	0.14821	0.0727891	0.159074	0.0486696	0.143472	0.116912	0.125144	0.0136868
95	CONTROL	3.3	Male	NA	27831	9143	540	893	128	94	3355	2510	1420	2038	4853	1516	935	406	0.328519	0.0194028	0.0320865	0.00459919	0.00337753	0.120549	0.0901872	0.0510222	0.0732277	0.174374	0.0544716	0.0335956	0.014588
96	CONTROL	11.9	Male	NA	32397	5329	93	175	394	56	6107	1257	5177	863	4274	6008	2129	535	0.164491	0.00287064	0.00540173	0.0121616	0.00172856	0.188505	0.0387999	0.159799	0.0266383	0.131926	0.185449	0.065716	0.0165139
97	CONTROL	6	Female	NA	129547	56549	3136	1908	1133	507	21574	7320	4238	9856	16602	3383	1682	1659	0.436513	0.0242074	0.0147282	0.00874586	0.00391364	0.166534	0.0565046	0.032714	0.0760805	0.128154	0.0261141	0.0129837	0.0128062
98	CONTROL	2.8	Female	NA	27367	7583	533	242	425	106	3873	1973	3842	3128	3437	641	868	716	0.277086	0.019476	0.00884277	0.0155297	0.00387328	0.141521	0.0720941	0.140388	0.114298	0.125589	0.0234224	0.031717	0.0261629
99	CONTROL	7.1	Male	NA	38130	3616	1303	179	189	358	7950	4513	2460	7512	4095	1996	1960	1999	0.0948335	0.0341726	0.00469447	0.00495673	0.00938893	0.208497	0.118358	0.0645161	0.19701	0.107396	0.0523472	0.0514031	0.0524259

## Sheet: Aden_Tons_CD8
patient_id	organ	status	age	sex	dpi	total.n	cluster_1	cluster_2	cluster_3	cluster_4	cluster_5	cluster_6	cluster_7	cluster_8	cluster_9	cluster_10	cluster_11	cluster_1_freq	cluster_2_freq	cluster_3_freq	cluster_4_freq	cluster_5_freq	cluster_6_freq	cluster_7_freq	cluster_8_freq	cluster_9_freq	cluster_10_freq	cluster_11_freq
100	Tonsil	COVID	4.7	Female	25	15817	5797	1167	293	2515	1305	1784	917	395	192	1338	114	0.366504	0.0737814	0.0185244	0.159006	0.0825062	0.11279	0.0579756	0.0249731	0.0121388	0.0845925	0.00720744
101	Adenoid	COVID	4.6	Male	NA	53217	2805	11933	7406	4247	3408	2725	7294	4750	5295	2542	812	0.0527087	0.224233	0.139166	0.0798053	0.0640397	0.0512054	0.137061	0.0892572	0.0994983	0.0477667	0.0152583
101	Tonsil	COVID	4.6	Male	NA	25938	2562	5387	5777	1560	1577	970	4729	142	1755	1226	253	0.098774	0.207688	0.222723	0.0601434	0.0607988	0.0373969	0.182319	0.00547459	0.0676613	0.0472666	0.00975403
102	Tonsil	COVID	6	Male	35	18219	2416	1836	3475	833	2197	1389	2769	775	331	2003	195	0.132609	0.100774	0.190735	0.0457215	0.120588	0.0762391	0.151984	0.042538	0.0181678	0.10994	0.0107031
20	Adenoid	CONTROL	8.2	Male	NA	37957	2364	3792	3273	1832	2980	2366	5021	4375	8109	3781	64	0.062281	0.0999025	0.0862292	0.0482651	0.0785099	0.0623337	0.132281	0.115262	0.213636	0.0996127	0.00168612
20	Tonsil	CONTROL	8.2	Male	NA	101175	25426	6452	6559	4297	14027	8328	11665	6619	3656	13871	275	0.251307	0.0637707	0.0648283	0.042471	0.138641	0.0823128	0.115295	0.0654213	0.0361354	0.137099	0.00271806
21	Adenoid	CONTROL	1.7	Female	NA	42676	8818	3115	275	4629	2577	9541	1953	5220	1858	4570	120	0.206627	0.0729918	0.0064439	0.108468	0.0603852	0.223568	0.0457634	0.122317	0.0435374	0.107086	0.00281188
21	Tonsil	CONTROL	1.7	Female	NA	15137	3899	1498	549	62	1489	3748	2147	730	415	567	33	0.257581	0.0989628	0.0362687	0.00409592	0.0983682	0.247605	0.141838	0.0482262	0.0274163	0.0374579	0.00218009
22	Adenoid	COVID	4.1	Male	108	47169	3065	15539	13221	1846	1812	2767	4449	1909	1596	901	64	0.0649791	0.329432	0.28029	0.0391359	0.0384151	0.0586614	0.0943204	0.0404715	0.0338358	0.0191015	0.00135682
22	Tonsil	COVID	4.1	Male	108	39656	6618	8064	11024	2238	1731	1828	5260	1179	385	1214	115	0.166885	0.203349	0.277991	0.0564353	0.0436504	0.0460964	0.132641	0.0297307	0.00970849	0.0306133	0.00289994
23	Adenoid	CONTROL	2.9	Male	NA	39742	3941	13296	6854	1186	2001	2092	4823	2002	2139	1225	183	0.0991646	0.334558	0.172462	0.0298425	0.0503498	0.0526395	0.121358	0.0503749	0.0538222	0.0308238	0.0046047
23	Tonsil	CONTROL	2.9	Male	NA	28491	5048	7420	6228	1200	1974	2020	2601	623	676	518	183	0.177179	0.260433	0.218595	0.0421186	0.069285	0.0708996	0.091292	0.0218666	0.0237268	0.0181812	0.00642308
24	Adenoid	CONTROL	2	Male	NA	66098	10567	5717	2356	9061	6839	7036	3224	9218	3423	8506	151	0.159869	0.0864928	0.035644	0.137084	0.103468	0.106448	0.0487761	0.13946	0.0517867	0.128688	0.00228449
24	Tonsil	CONTROL	2	Male	NA	31806	7296	2122	914	4377	3051	3779	2956	2655	444	4117	95	0.229391	0.066717	0.0287367	0.137616	0.0959253	0.118814	0.0929384	0.0834748	0.0139596	0.129441	0.00298686
28	Adenoid	CONTROL	4.3	Female	NA	68720	1470	7905	20970	7315	3326	2704	11310	3964	2600	6967	189	0.0213912	0.115032	0.305151	0.106446	0.0483993	0.0393481	0.164581	0.0576834	0.0378347	0.101382	0.00275029
28	Tonsil	CONTROL	4.3	Female	NA	55226	3427	4144	22964	364	2868	2446	10355	1532	1029	5907	190	0.0620541	0.0750371	0.415819	0.0065911	0.0519321	0.0442907	0.187502	0.0277406	0.0186325	0.10696	0.00344041
29	Adenoid	COVID	3.1	Male	NA	31890	2004	1729	471	3048	1871	4938	1019	8811	1394	6546	59	0.062841	0.0542176	0.0147695	0.0955786	0.0586704	0.154845	0.0319536	0.276294	0.0437128	0.205268	0.00185011
29	Tonsil	COVID	3.1	Male	NA	28777	6068	787	678	2510	1236	4924	696	3486	326	7851	215	0.210863	0.0273482	0.0235605	0.0872224	0.042951	0.171109	0.024186	0.121138	0.0113285	0.272822	0.00747124
31	Adenoid	CONTROL	11.2	Female	NA	112618	4365	8893	4926	19195	8312	8333	10747	13548	5578	28409	312	0.0387593	0.0789661	0.0437408	0.170443	0.073807	0.0739935	0.0954288	0.1203	0.0495303	0.25226	0.00277043
31	Tonsil	CONTROL	11.2	Female	NA	71636	9170	5684	5796	1075	8015	9938	9638	4758	2385	15004	173	0.128008	0.0793456	0.080909	0.0150064	0.111885	0.138729	0.134541	0.0664191	0.0332933	0.209448	0.00241499
32	Adenoid	COVID	3.6	Female	26	20104	346	3088	3767	1113	2428	1117	2909	1922	1891	1443	80	0.0172105	0.153601	0.187376	0.0553621	0.120772	0.0555611	0.144698	0.0956029	0.0940609	0.0717768	0.00397931
32	Tonsil	COVID	3.6	Female	26	22600	1339	2563	5141	736	3400	1405	3969	949	692	2350	56	0.0592478	0.113407	0.227478	0.0325664	0.150442	0.0621681	0.175619	0.0419912	0.0306195	0.103982	0.00247788
34	Adenoid	CONTROL	13.8	Male	NA	77334	1539	5825	8490	5663	9365	3871	6561	9236	21164	5441	179	0.0199007	0.0753226	0.109784	0.0732278	0.121098	0.0500556	0.0848398	0.11943	0.27367	0.0703572	0.00231464
34	Tonsil	CONTROL	13.8	Male	NA	60457	9146	2693	9242	6811	7504	2081	6493	4369	2750	9234	134	0.151281	0.0445441	0.152869	0.112659	0.124121	0.0344212	0.107399	0.0722662	0.0454869	0.152737	0.00221645
35	Tonsil	CONTROL	18	Female	NA	31740	6916	1122	4471	1154	2732	871	5929	1032	1878	5535	100	0.217895	0.0353497	0.140863	0.0363579	0.0860744	0.0274417	0.186799	0.0325142	0.0591682	0.174386	0.0031506
36	Adenoid	CONTROL	12	Male	NA	170383	11726	12330	24187	45083	9186	8217	19796	13873	6479	19065	441	0.0688214	0.0723664	0.141957	0.264598	0.0539138	0.0482266	0.116185	0.0814224	0.0380261	0.111895	0.00258829
36	Tonsil	CONTROL	12	Male	NA	105069	13149	5132	21233	19957	6728	4293	13355	2771	2069	16044	338	0.125146	0.0488441	0.202086	0.189942	0.0640341	0.0408589	0.127107	0.0263731	0.0196918	0.1527	0.00321693
39	Tonsil	CONTROL	16.1	Male	NA	35983	8830	780	4985	91	4012	2127	5533	2532	1697	5285	111	0.245394	0.0216769	0.138538	0.00252897	0.111497	0.0591112	0.153767	0.0703666	0.0471612	0.146875	0.00308479
41	Adenoid	COVID	6	Female	NA	136174	8443	25347	24427	10987	6450	7110	19393	15920	5069	12762	266	0.0620016	0.186137	0.179381	0.0806835	0.0473659	0.0522126	0.142413	0.116909	0.0372244	0.0937183	0.00195338
41	Tonsil	COVID	6	Female	NA	55807	3409	12068	17281	1428	1185	1372	14539	603	1418	2353	151	0.0610855	0.216245	0.309656	0.0255882	0.0212339	0.0245847	0.260523	0.0108051	0.025409	0.0421632	0.00270575
42	Adenoid	CONTROL	7.6	Female	NA	66857	4483	6588	10408	3343	8027	4487	8800	6435	3006	11102	178	0.0670536	0.0985387	0.155676	0.0500022	0.120062	0.0671134	0.131624	0.0962502	0.0449616	0.166056	0.0026624
42	Tonsil	CONTROL	7.6	Female	NA	65031	8372	5893	13040	1607	8563	4956	9574	3385	679	8753	209	0.128739	0.0906183	0.20052	0.0247113	0.131676	0.0762098	0.147222	0.0520521	0.0104412	0.134597	0.00321385
44	Adenoid	CONTROL	4.6	Male	NA	59665	5763	2880	3076	8740	5036	2275	13774	6160	8615	3137	209	0.0965893	0.0482695	0.0515545	0.146485	0.0844046	0.0381296	0.230856	0.103243	0.14439	0.0525769	0.00350289
44	Tonsil	CONTROL	4.6	Male	NA	39941	9958	3649	2816	9515	2498	1572	3693	1821	971	3349	99	0.249318	0.0913598	0.070504	0.238226	0.0625422	0.0393581	0.0924614	0.0455922	0.0243109	0.0838487	0.00247866
45	Adenoid	CONTROL	4.3	Female	NA	51793	6020	16007	7616	4668	5692	2221	4203	1323	1987	1930	126	0.116232	0.309057	0.147047	0.090128	0.109899	0.0428822	0.08115	0.025544	0.0383643	0.0372637	0.00243276
45	Tonsil	CONTROL	4.3	Female	NA	58873	6728	16381	12261	4902	6255	2438	5416	981	1516	1785	210	0.11428	0.278243	0.208262	0.083264	0.106246	0.0414112	0.0919946	0.016663	0.0257503	0.0303195	0.003567
46	Adenoid	COVID	7.2	Male	NA	41920	5327	4448	2682	2575	5273	4215	1745	6535	8243	828	49	0.127075	0.106107	0.063979	0.0614265	0.125787	0.100549	0.0416269	0.155892	0.196636	0.0197519	0.00116889
46	Tonsil	COVID	7.2	Male	NA	19526	4073	2945	3334	1051	2399	1049	2414	671	996	558	36	0.208594	0.150825	0.170747	0.0538257	0.122862	0.0537232	0.12363	0.0343644	0.0510089	0.0285773	0.0018437
48	Adenoid	CONTROL	10.9	Male	NA	86572	14996	9220	4424	11800	3756	7328	10982	9502	3961	10479	124	0.17322	0.106501	0.051102	0.136303	0.0433859	0.0846463	0.126854	0.109758	0.0457538	0.121044	0.00143233
48	Tonsil	CONTROL	10.9	Male	NA	80672	16230	8423	7814	10057	2271	5740	16699	4218	3071	6006	143	0.201185	0.10441	0.0968614	0.124665	0.028151	0.0711523	0.206999	0.0522858	0.0380677	0.0744496	0.00177261
49	Adenoid	CONTROL	2.7	Male	NA	74360	12059	15183	6637	5935	5380	7757	9645	5045	1827	4715	177	0.162171	0.204182	0.089255	0.0798144	0.0723507	0.104317	0.129707	0.0678456	0.0245697	0.0634077	0.00238031
49	Tonsil	CONTROL	2.7	Male	NA	51317	7545	9547	8524	3649	4055	4617	8613	1405	853	2387	122	0.147027	0.18604	0.166105	0.071107	0.0790186	0.0899702	0.167839	0.0273788	0.0166222	0.0465148	0.00237738
50	Adenoid	COVID	2.9	Female	31	10504	725	1031	385	2260	1089	817	1275	888	756	1259	19	0.0690213	0.0981531	0.0366527	0.215156	0.103675	0.0777799	0.121382	0.0845392	0.0719726	0.119859	0.00180883
50	Tonsil	COVID	2.9	Female	31	9335	1196	799	769	1663	1315	850	1158	208	115	1247	15	0.12812	0.0855919	0.0823781	0.178147	0.140868	0.0910552	0.124049	0.0222817	0.0123192	0.133583	0.00160686
51	Adenoid	CONTROL	5.7	Male	NA	3643	255	109	191	562	511	218	305	899	133	456	4	0.0699973	0.0299204	0.0524293	0.154268	0.140269	0.0598408	0.0837222	0.246775	0.0365084	0.125172	0.001098
51	Tonsil	CONTROL	5.7	Male	NA	6617	1179	308	899	681	1096	317	642	259	148	1075	13	0.178177	0.0465468	0.135862	0.102917	0.165634	0.0479069	0.0970228	0.0391416	0.0223666	0.16246	0.00196464
52	Tonsil	CONTROL	14.1	Male	NA	11083	1576	682	2346	569	912	355	2324	411	301	1591	16	0.1422	0.0615357	0.211676	0.0513399	0.0822882	0.032031	0.209691	0.0370838	0.0271587	0.143553	0.00144365
54	Adenoid	CONTROL	2.3	Female	NA	49295	6436	1854	355	3061	6509	4632	1897	8058	5651	10775	67	0.130561	0.0376103	0.00720154	0.0620955	0.132042	0.0939649	0.0384826	0.163465	0.114636	0.218582	0.00135916
54	Tonsil	CONTROL	2.3	Female	NA	43036	12029	1270	767	1792	7432	4159	2287	1871	331	10977	121	0.27951	0.0295102	0.0178223	0.0416396	0.172693	0.09664	0.0531416	0.0434752	0.00769124	0.255066	0.0028116
55	Adenoid	CONTROL	10.7	Male	NA	59164	2537	3853	1875	3685	8028	2668	10244	6742	13531	5945	56	0.0428808	0.0651241	0.0316916	0.0622845	0.135691	0.045095	0.173146	0.113954	0.228703	0.100483	0.000946522
55	Tonsil	CONTROL	10.7	Male	NA	60813	10639	5001	4650	810	9189	3613	10404	4106	3818	8361	222	0.174946	0.0822357	0.0764639	0.0133195	0.151103	0.0594116	0.171082	0.0675185	0.0627826	0.137487	0.00365054
56	Adenoid	CONTROL	2.6	Female	NA	29602	4292	2134	710	4273	1459	3447	2872	6036	439	3848	92	0.14499	0.0720897	0.0239849	0.144348	0.0492872	0.116445	0.0970205	0.203905	0.0148301	0.129991	0.0031079
56	Tonsil	CONTROL	2.6	Female	NA	22520	6074	1327	576	2012	2108	1879	1786	2337	788	3559	74	0.269716	0.0589254	0.0255773	0.0893428	0.0936057	0.0834369	0.0793073	0.103774	0.0349911	0.158037	0.00328597
57	Adenoid	CONTROL	3.2	Male	NA	64831	13441	934	159	5660	7705	7417	652	15975	1051	11533	304	0.207324	0.0144067	0.00245253	0.0873039	0.118847	0.114405	0.0100569	0.24641	0.0162114	0.177893	0.00468911
57	Tonsil	CONTROL	3.2	Male	NA	11935	2123	186	127	565	2269	1661	215	3445	234	1089	21	0.17788	0.0155844	0.010641	0.0473398	0.190113	0.139171	0.0180142	0.288647	0.0196062	0.0912442	0.00175953
59	Adenoid	CONTROL	3.5	Male	NA	135850	82533	1694	1266	13103	14981	5852	1800	9914	703	2840	1164	0.60753	0.0124696	0.0093191	0.096452	0.110276	0.0430769	0.0132499	0.0729775	0.00517483	0.0209054	0.00856827
59	Tonsil	CONTROL	3.5	Male	NA	17820	7259	1064	1063	1854	3148	1464	906	366	293	374	29	0.407351	0.0597082	0.0596521	0.10404	0.176655	0.0821549	0.0508418	0.0205387	0.0164422	0.0209877	0.00162738
62	Tonsil	CONTROL	17	Female	NA	76143	13598	21784	7546	7007	5739	1680	11023	814	5662	929	361	0.178585	0.286093	0.099103	0.0920242	0.0753713	0.0220637	0.144767	0.0106904	0.0743601	0.0122007	0.00474108
63	Adenoid	CONTROL	6.9	Male	NA	27135	3637	1750	1532	716	2049	4496	2035	4596	5887	346	91	0.134034	0.0644924	0.0564584	0.0263866	0.0755113	0.16569	0.0749954	0.169375	0.216952	0.0127511	0.0033536
63	Tonsil	CONTROL	6.9	Male	NA	54230	16607	4153	5251	739	4606	10863	5866	2011	3022	817	295	0.306233	0.0765812	0.0968283	0.0136271	0.0849345	0.200313	0.108169	0.0370828	0.0557256	0.0150655	0.00543979
64	Adenoid	CONTROL	3	Female	NA	38327	2754	11532	12094	1187	1867	1671	3193	1511	1087	1279	152	0.0718554	0.300884	0.315548	0.0309703	0.0487124	0.0435985	0.0833094	0.0394239	0.0283612	0.0333707	0.00396587
64	Tonsil	CONTROL	3	Female	NA	54604	8964	9497	20062	246	3130	2928	5601	936	929	2128	183	0.164164	0.173925	0.367409	0.00450516	0.0573218	0.0536224	0.102575	0.0171416	0.0170134	0.0389715	0.0033514
65	Adenoid	CONTROL	4.5	Male	NA	43368	3177	1277	2212	8133	3379	6018	3626	6406	5899	3106	135	0.0732568	0.0294457	0.0510053	0.187535	0.0779146	0.138766	0.08361	0.147713	0.136022	0.0716196	0.00311289
65	Tonsil	CONTROL	4.5	Male	NA	47786	15194	2231	6008	3113	3143	5671	3303	2532	1034	5330	227	0.317959	0.0466873	0.125727	0.0651446	0.0657724	0.118675	0.0691207	0.0529862	0.0216381	0.111539	0.00475035
69	Adenoid	COVID	3.4	Female	201	63779	13148	1017	158	6090	4317	7854	976	14020	1994	14022	183	0.206149	0.0159457	0.0024773	0.095486	0.0676869	0.123144	0.0153028	0.219822	0.0312642	0.219853	0.00286928
69	Tonsil	COVID	3.4	Female	201	43821	15978	693	153	1246	3346	5984	764	4989	398	10186	84	0.36462	0.0158143	0.00349148	0.0284339	0.0763561	0.136556	0.0174346	0.11385	0.0090824	0.232446	0.00191689
70	Tonsil	COVID	16.4	Male	98	44091	6103	3025	6244	9983	1178	1368	6778	2372	1224	5670	146	0.138418	0.0686081	0.141616	0.226418	0.0267175	0.0310267	0.153728	0.0537978	0.0277608	0.128598	0.00331133
71	Adenoid	COVID	6.2	Female	71	99101	9101	15885	13243	6329	12910	5639	16282	8539	7135	3670	368	0.0918356	0.160291	0.133631	0.0638641	0.130271	0.0569015	0.164297	0.0861646	0.0719973	0.0370329	0.00371338
71	Tonsil	COVID	6.2	Female	71	42070	9784	4447	13110	57	4763	1993	5368	1055	680	691	122	0.232565	0.105705	0.311623	0.00135488	0.113216	0.0473734	0.127597	0.0250773	0.0161635	0.016425	0.00289993
72	Adenoid	CONTROL	7.7	Female	NA	30308	8845	2187	911	2774	1293	2972	3202	3093	2616	2359	56	0.291837	0.0721592	0.0300581	0.091527	0.042662	0.0980599	0.105649	0.102052	0.0863138	0.0778342	0.0018477
72	Tonsil	CONTROL	7.7	Female	NA	65281	29158	4018	2995	829	3051	7412	8102	2171	2229	5039	277	0.446654	0.0615493	0.0458786	0.0126989	0.0467364	0.11354	0.12411	0.0332562	0.0341447	0.0771894	0.00424319
73	Adenoid	CONTROL	5.8	Male	NA	36915	5174	4071	6733	1376	3421	3386	5399	3689	2212	1414	40	0.14016	0.11028	0.182392	0.0372748	0.0926724	0.0917242	0.146255	0.0999323	0.0599214	0.0383042	0.00108357
73	Tonsil	CONTROL	5.8	Male	NA	47170	17424	4254	8028	0	3548	4069	6383	1799	893	616	156	0.369387	0.0901844	0.170193	0	0.0752173	0.0862625	0.135319	0.0381386	0.0189315	0.0130591	0.00330719
74	Tonsil	CONTROL	14.6	Male	NA	27923	15585	339	594	21	2143	3456	618	1594	2795	712	66	0.558142	0.0121405	0.0212728	0.000752068	0.0767468	0.123769	0.0221323	0.0570856	0.100097	0.0254987	0.00236364
77	Adenoid	CONTROL	9.6	Female	NA	56478	6134	5384	7726	9869	2999	1311	7958	2884	9335	2816	62	0.108609	0.0953292	0.136797	0.174741	0.0531003	0.0232126	0.140904	0.0510641	0.165286	0.0498601	0.00109777
77	Tonsil	CONTROL	9.6	Female	NA	91023	9260	9125	19048	15368	8348	2517	15376	1984	6693	3152	152	0.101733	0.100249	0.209266	0.168836	0.0917131	0.0276524	0.168924	0.0217967	0.0735309	0.0346286	0.00166991
81	Adenoid	CONTROL	3.4	Female	NA	90266	24530	1190	460	25846	4272	7931	1280	9559	4693	10132	373	0.271752	0.0131833	0.00509605	0.286332	0.0473268	0.0878625	0.0141803	0.105898	0.0519908	0.112246	0.00413223
81	Tonsil	CONTROL	3.4	Female	NA	14413	3876	427	254	4106	798	1382	298	794	831	1583	64	0.268924	0.029626	0.017623	0.284882	0.0553667	0.0958857	0.0206758	0.0550892	0.0576563	0.109831	0.00444044
82	Adenoid	CONTROL	6.9	Male	NA	12317	1340	2711	601	468	1755	409	2892	455	1250	365	71	0.108793	0.220102	0.0487943	0.0379963	0.142486	0.0332061	0.234797	0.0369408	0.101486	0.0296338	0.00576439
82	Tonsil	CONTROL	6.9	Male	NA	52334	5467	11163	4913	2339	8805	1964	10913	869	3984	1548	369	0.104464	0.213303	0.0938778	0.0446937	0.168246	0.0375282	0.208526	0.0166049	0.0761264	0.0295792	0.00705087
83	Adenoid	CONTROL	3.7	Female	NA	46035	2809	10855	10133	1580	5650	1275	7122	2643	2149	1749	70	0.0610188	0.235799	0.220115	0.0343217	0.122733	0.0276963	0.154708	0.0574128	0.0466819	0.0379928	0.00152058
83	Tonsil	CONTROL	3.7	Female	NA	34416	2529	6018	8546	1081	6644	1302	5548	995	833	854	66	0.0734833	0.174861	0.248315	0.0314098	0.19305	0.0378312	0.161204	0.028911	0.0242039	0.024814	0.00191771
84	Adenoid	CONTROL	3.2	Male	NA	102618	9645	2045	301	31022	9552	10584	1512	24386	1294	12013	264	0.0939894	0.0199283	0.00293321	0.302306	0.0930831	0.10314	0.0147343	0.237639	0.0126099	0.117065	0.00257265
84	Tonsil	CONTROL	3.2	Male	NA	34947	6025	1206	420	9076	5982	2278	1789	4546	418	3143	64	0.172404	0.0345094	0.0120182	0.259708	0.171173	0.0651844	0.0511918	0.130083	0.011961	0.0899362	0.00183134
85	Adenoid	CONTROL	5.1	Female	NA	45861	16342	1132	145	4269	1590	6070	766	8691	3196	3478	182	0.356338	0.0246833	0.00316173	0.0930856	0.03467	0.132356	0.0167026	0.189507	0.0696888	0.0758379	0.00396851
85	Tonsil	CONTROL	5.1	Female	NA	43214	16393	1793	317	2675	3991	5910	3237	4933	707	3073	185	0.379345	0.0414912	0.00733559	0.0619012	0.0923543	0.136761	0.0749063	0.114153	0.0163604	0.0711112	0.00428102
86	Adenoid	CONTROL	5.3	Female	NA	118899	9435	13828	8460	6950	22201	10753	18440	5259	16243	6833	497	0.0793531	0.1163	0.0711528	0.058453	0.186722	0.0904381	0.15509	0.0442308	0.136612	0.0574689	0.00418002
86	Tonsil	CONTROL	5.3	Female	NA	54535	5202	5926	7342	2467	13311	3797	11580	1320	1448	2060	82	0.0953883	0.108664	0.134629	0.045237	0.244082	0.069625	0.212341	0.0242046	0.0265518	0.0377739	0.00150362
87	Adenoid	COVID	6	Male	NA	129374	18451	14767	11808	13610	8653	7389	17167	10974	9055	17128	372	0.142618	0.114142	0.0912703	0.105199	0.0668836	0.0571135	0.132693	0.0848238	0.0699909	0.132391	0.00287538
87	Tonsil	COVID	6	Male	NA	67145	12041	6316	12220	5720	5109	3747	12681	2425	825	5970	91	0.179328	0.0940651	0.181994	0.0851888	0.0760891	0.0558046	0.18886	0.0361159	0.0122868	0.0889121	0.00135528
89	Adenoid	COVID	12.1	Female	NA	45485	2971	8789	6229	4209	3522	1797	8202	2957	3153	3415	241	0.0653182	0.193229	0.136946	0.092536	0.0774321	0.0395075	0.180323	0.0650104	0.0693196	0.0750797	0.00529845
89	Tonsil	COVID	12.1	Female	NA	74570	9402	8291	10026	9594	6754	3320	12925	4072	4018	5827	341	0.126083	0.111184	0.134451	0.128658	0.0905726	0.0445219	0.173327	0.0546064	0.0538823	0.0781413	0.00457288
90	Adenoid	CONTROL	3.1	Male	NA	57401	8632	4670	1041	4623	4883	5919	9863	5832	7417	4067	454	0.150381	0.0813575	0.0181356	0.0805387	0.0850682	0.103117	0.171826	0.101601	0.129214	0.0708524	0.00790927
91	Adenoid	COVID	9.2	Male	NA	36259	1645	3522	5315	2419	1566	2260	8246	3441	6430	995	420	0.045368	0.0971345	0.146584	0.0667145	0.0431893	0.0623294	0.227419	0.0949006	0.177335	0.0274415	0.0115833
91	Tonsil	COVID	9.2	Male	NA	39010	5806	4068	7808	2140	1936	2607	7478	1200	2550	2840	577	0.148834	0.104281	0.200154	0.0548577	0.0496283	0.066829	0.191694	0.0307613	0.0653679	0.0728018	0.0147911
94	Adenoid	CONTROL	3	Male	NA	19615	3455	956	167	5437	672	1300	561	3451	1011	2506	99	0.176141	0.0487382	0.00851389	0.277186	0.0342595	0.0662758	0.0286006	0.175937	0.0515422	0.127759	0.00504716
94	Tonsil	CONTROL	3	Male	NA	19144	4691	718	287	6986	1009	1340	861	759	555	1885	53	0.245038	0.0375052	0.0149916	0.364919	0.0527058	0.0699958	0.0449749	0.0396469	0.0289908	0.0984643	0.00276849
95	Adenoid	CONTROL	3.3	Male	NA	45148	16864	863	373	3191	2672	5583	759	7366	1226	5992	259	0.373527	0.0191149	0.00826172	0.0706787	0.0591831	0.12366	0.0168114	0.163152	0.0271551	0.132719	0.00573669
95	Tonsil	CONTROL	3.3	Male	NA	42642	17360	1472	712	2416	6140	6294	1700	2705	825	2794	224	0.40711	0.03452	0.0166972	0.0566578	0.143989	0.147601	0.0398668	0.0634351	0.0193471	0.0655223	0.00525304
96	Tonsil	CONTROL	11.9	Male	NA	27596	10978	719	1659	114	2488	2048	2427	2196	875	3918	174	0.397811	0.0260545	0.0601174	0.00413103	0.090158	0.0742137	0.0879475	0.0795768	0.0317075	0.141977	0.00630526
97	Adenoid	CONTROL	6	Female	NA	56374	4204	10143	8599	5368	2306	2693	8801	4173	5251	4678	158	0.0745734	0.179923	0.152535	0.0952212	0.0409054	0.0477702	0.156118	0.0740235	0.0931458	0.0829815	0.00280271
97	Tonsil	CONTROL	6	Female	NA	88300	18156	7429	16351	5603	3416	3323	13476	3076	2133	14846	491	0.205617	0.0841336	0.185176	0.0634541	0.0386863	0.0376331	0.152616	0.0348358	0.0241563	0.168131	0.00556059
98	Tonsil	CONTROL	2.8	Female	NA	60420	19848	4382	3749	6308	5027	5984	5417	3282	656	5462	305	0.3285	0.0725257	0.062049	0.104403	0.0832009	0.0990401	0.0896557	0.0543198	0.0108573	0.0904005	0.005048
99	Tonsil	CONTROL	7.1	Male	NA	56610	10972	7243	4686	7653	7023	5268	3928	2454	2049	5001	333	0.193817	0.127946	0.0827769	0.135188	0.124059	0.0930578	0.069387	0.0433492	0.036195	0.0883413	0.00588235

## Sheet: Aden_Tons_CD4
patient_id	organ	status	age	sex	dpi	total.n	cluster_1	cluster_2	cluster_3	cluster_4	cluster_5	cluster_6	cluster_7	cluster_8	cluster_9	cluster_10	cluster_11	cluster_12	cluster_1_freq	cluster_2_freq	cluster_3_freq	cluster_4_freq	cluster_5_freq	cluster_6_freq	cluster_7_freq	cluster_8_freq	cluster_9_freq	cluster_10_freq	cluster_11_freq	cluster_12_freq
100	Tonsil	COVID	4.7	Female	25	90779	31188	15214	12071	8950	8427	5682	2446	2948	518	1116	2011	208	0.34356	0.167594	0.132971	0.0985911	0.0928298	0.0625916	0.0269446	0.0324745	0.00570617	0.0122936	0.0221527	0.00229128
101	Adenoid	COVID	4.6	Male	NA	216134	34214	16652	21317	62503	13185	22950	20302	17573	1637	2243	2877	681	0.1583	0.0770448	0.0986286	0.289186	0.0610038	0.106184	0.0939325	0.081306	0.00757401	0.0103778	0.0133112	0.00315082
101	Tonsil	COVID	4.6	Male	NA	117862	34585	8098	22506	21355	9677	6901	3479	8956	299	704	1223	79	0.293436	0.0687075	0.190952	0.181186	0.0821045	0.0585515	0.0295176	0.0759872	0.00253687	0.00597309	0.0103765	0.000670275
102	Tonsil	COVID	6	Male	35	104406	25916	9329	16748	14254	9046	10267	6372	7529	980	2402	1116	447	0.248223	0.0893531	0.160412	0.136525	0.0866425	0.0983373	0.061031	0.0721127	0.00938643	0.0230063	0.010689	0.00428136
20	Adenoid	CONTROL	8.2	Male	NA	178572	28597	15152	11249	29689	9445	30101	30751	11403	7309	2228	2441	207	0.160143	0.0848509	0.0629942	0.166258	0.0528918	0.168565	0.172205	0.0638566	0.0409303	0.0124768	0.0136696	0.0011592
20	Tonsil	CONTROL	8.2	Male	NA	338880	49754	58665	28090	35001	27990	46379	33033	8059	35314	5537	10061	997	0.146819	0.173114	0.0828907	0.103284	0.0825956	0.13686	0.097477	0.0237813	0.104208	0.0163391	0.029689	0.00294204
21	Adenoid	CONTROL	1.7	Female	NA	328958	98334	57448	12022	45306	28145	39968	14155	8398	13122	5320	5855	885	0.298926	0.174636	0.0365457	0.137726	0.085558	0.121499	0.0430298	0.0255291	0.0398896	0.0161723	0.0177986	0.00269031
21	Tonsil	CONTROL	1.7	Female	NA	149888	9447	956	6869	1932	17276	71908	18487	1554	18253	1331	1603	272	0.0630271	0.0063781	0.0458276	0.0128896	0.115259	0.479745	0.123339	0.0103677	0.121778	0.00887996	0.0106947	0.00181469
22	Adenoid	COVID	4.1	Male	108	231618	73828	9561	37879	33912	22958	27239	8587	13898	1015	1357	980	404	0.318749	0.0412792	0.163541	0.146413	0.0991201	0.117603	0.037074	0.060004	0.00438222	0.00585878	0.0042311	0.00174425
22	Tonsil	COVID	4.1	Male	108	183968	48855	21474	43206	23828	11898	11709	5103	13807	276	1650	1665	497	0.265562	0.116727	0.234856	0.129523	0.0646743	0.0636469	0.0277385	0.0750511	0.00150026	0.00896895	0.00905049	0.00270156
23	Adenoid	CONTROL	2.9	Male	NA	261805	50217	27545	39448	55160	20371	28853	14038	17092	1900	3877	2837	467	0.191811	0.105212	0.150677	0.210691	0.0778098	0.110208	0.0536201	0.0652852	0.00725731	0.0148087	0.0108363	0.00178377
23	Tonsil	CONTROL	2.9	Male	NA	215628	69933	27669	45984	26382	14541	10254	4280	8492	1176	3567	2877	473	0.324322	0.128318	0.213256	0.12235	0.0674356	0.0475541	0.019849	0.0393826	0.00545384	0.0165424	0.0133424	0.00219359
24	Adenoid	CONTROL	2	Male	NA	297296	69317	67882	29348	55783	20939	19120	10740	9277	2676	5818	5616	780	0.233158	0.228331	0.0987164	0.187635	0.0704315	0.064313	0.0361256	0.0312046	0.00900113	0.0195697	0.0188903	0.00262365
24	Tonsil	CONTROL	2	Male	NA	214345	65842	47216	22897	22910	20386	11071	3835	9028	1628	6040	2968	524	0.307178	0.22028	0.106823	0.106884	0.0951084	0.0516504	0.0178917	0.042119	0.00759523	0.0281789	0.0138468	0.00244466
27	Adenoid	CONTROL	2.4	Male	NA	341000	72220	75830	35440	39620	36442	40704	12368	9996	7043	1875	8391	1071	0.211789	0.222375	0.10393	0.116188	0.106868	0.119367	0.0362698	0.0293138	0.020654	0.00549853	0.024607	0.00314076
27	Tonsil	CONTROL	2.4	Male	NA	311676	69197	101597	37072	26218	29671	7725	4594	14729	6089	3449	10013	1322	0.222016	0.32597	0.118944	0.0841194	0.0951982	0.0247854	0.0147397	0.0472574	0.0195363	0.011066	0.0321263	0.00424158
28	Adenoid	CONTROL	4.3	Female	NA	475197	89240	38250	35884	140442	36211	50922	32838	31639	4223	7327	6707	1514	0.187796	0.0804929	0.0755139	0.295545	0.0762021	0.10716	0.069104	0.0665808	0.00888684	0.0154189	0.0141141	0.00318605
28	Tonsil	CONTROL	4.3	Female	NA	399560	76943	1680	47678	33336	26633	88867	76386	8675	26341	6608	4735	1678	0.192569	0.00420463	0.119326	0.0834318	0.0666558	0.222412	0.191175	0.0217114	0.065925	0.0165382	0.0118505	0.00419962
29	Adenoid	COVID	3.1	Male	NA	191020	26008	25147	20033	36564	7031	36323	17504	4240	9681	4618	3561	310	0.136153	0.131646	0.104874	0.191415	0.0368077	0.190153	0.0916344	0.0221966	0.0506806	0.0241755	0.018642	0.00162287
29	Tonsil	COVID	3.1	Male	NA	294608	115640	27835	39547	20603	17475	29721	8861	8877	11064	9299	4329	1357	0.392522	0.0944815	0.134236	0.0699336	0.0593161	0.100883	0.0300773	0.0301316	0.037555	0.031564	0.0146941	0.00460612
31	Adenoid	CONTROL	11.2	Female	NA	614897	44686	130320	15498	99361	39200	42095	66972	77935	55106	21495	20776	1453	0.0726723	0.211938	0.0252042	0.16159	0.0637505	0.0684586	0.108916	0.126745	0.0896183	0.0349571	0.0337878	0.002363
31	Tonsil	CONTROL	11.2	Female	NA	380838	21062	6477	37115	6394	27826	77329	74719	16336	85870	16063	10546	1101	0.0553044	0.0170072	0.0974561	0.0167893	0.0730652	0.20305	0.196196	0.0428949	0.225476	0.042178	0.0276916	0.00289099
32	Adenoid	COVID	3.6	Female	26	193117	39075	9943	31159	27715	10620	48822	12006	8444	1644	2351	1007	331	0.202338	0.0514869	0.161348	0.143514	0.0549926	0.25281	0.0621696	0.0437248	0.00851297	0.012174	0.00521446	0.00171399
32	Tonsil	COVID	3.6	Female	26	230844	68527	4084	50738	19703	12989	41101	14320	7221	8116	2200	1353	492	0.296854	0.0176916	0.219793	0.085352	0.0562674	0.178047	0.0620332	0.0312809	0.0351579	0.00953025	0.0058611	0.00213131
34	Adenoid	CONTROL	13.8	Male	NA	442933	22602	31892	27857	186045	18242	39290	54046	48494	1393	3401	8180	1491	0.051028	0.0720019	0.0628921	0.42003	0.0411846	0.0887042	0.122018	0.109484	0.00314495	0.00767836	0.0184678	0.0033662
34	Tonsil	CONTROL	13.8	Male	NA	387285	78099	57985	48750	80684	25128	19489	29752	27181	3258	5567	10484	908	0.201658	0.149722	0.125876	0.208332	0.0648825	0.0503221	0.076822	0.0701835	0.00841241	0.0143744	0.0270705	0.00234453
35	Tonsil	CONTROL	18	Female	NA	299624	35867	16661	44279	49904	26997	27368	49898	20902	17023	1841	7743	1141	0.119707	0.0556064	0.147782	0.166555	0.0901029	0.0913411	0.166535	0.0697608	0.0568145	0.00614437	0.0258424	0.00380811
36	Adenoid	CONTROL	12	Male	NA	465531	48869	91459	37453	122674	27053	43752	35034	35724	5787	6987	9620	1119	0.104975	0.196462	0.0804522	0.263514	0.0581121	0.093983	0.075256	0.0767382	0.012431	0.0150087	0.0206646	0.00240371
36	Tonsil	CONTROL	12	Male	NA	336345	56002	49119	53949	48964	42327	16812	12706	27239	18296	3994	5642	1295	0.166502	0.146038	0.160398	0.145577	0.125844	0.0499844	0.0377767	0.0809853	0.0543965	0.0118747	0.0167744	0.00385021
39	Tonsil	CONTROL	16.1	Male	NA	259965	8723	3041	43413	8310	18950	35994	90984	10365	29827	4014	5794	550	0.0335545	0.0116977	0.166996	0.0319658	0.0728944	0.138457	0.349986	0.0398708	0.114735	0.0154405	0.0222876	0.00211567
41	Adenoid	COVID	6	Female	NA	380001	65176	34899	50164	79759	26300	41224	36262	35195	1890	3943	3938	1251	0.171515	0.0918392	0.13201	0.209892	0.0692103	0.108484	0.0954261	0.0926182	0.00497367	0.0103763	0.0103631	0.0032921
41	Tonsil	COVID	6	Female	NA	206803	56510	8385	35912	31052	21409	11711	10115	23904	2595	2855	1564	791	0.273255	0.0405458	0.173653	0.150153	0.103524	0.0566288	0.0489113	0.115588	0.0125482	0.0138054	0.00756275	0.0038249
42	Adenoid	CONTROL	7.6	Female	NA	411763	104638	38052	32118	107388	25545	29678	24883	38512	1493	4148	4146	1162	0.254122	0.0924124	0.0780012	0.260801	0.0620381	0.0720754	0.0604304	0.0935295	0.00362587	0.0100738	0.0100689	0.00282201
42	Tonsil	CONTROL	7.6	Female	NA	392011	165596	43411	59314	25703	34075	25396	7276	12082	5830	7224	4659	1445	0.422427	0.110739	0.151307	0.065567	0.0869236	0.0647839	0.0185607	0.0308206	0.014872	0.0184281	0.0118849	0.00368612
44	Adenoid	CONTROL	4.6	Male	NA	401172	48503	43014	42400	122531	18665	23816	47146	37298	5985	4241	5663	1910	0.120903	0.107221	0.10569	0.305433	0.0465262	0.0593661	0.117521	0.0929726	0.0149188	0.0105715	0.0141161	0.00476105
44	Tonsil	CONTROL	4.6	Male	NA	262099	84811	44131	54534	21940	14854	12317	7295	10724	2719	3633	3984	1157	0.323584	0.168375	0.208066	0.0837088	0.0566732	0.0469937	0.027833	0.0409158	0.0103739	0.0138612	0.0152004	0.00441436
45	Adenoid	CONTROL	4.3	Female	NA	315527	86509	39107	30775	47445	26509	44376	14980	11665	2541	4579	5283	1758	0.274173	0.123942	0.0975352	0.150367	0.084015	0.140641	0.0474761	0.0369699	0.00805319	0.0145122	0.0167434	0.00557163
45	Tonsil	CONTROL	4.3	Female	NA	339893	140915	41136	39054	33746	31092	20288	10659	9462	2731	3936	5116	1758	0.414586	0.121026	0.114901	0.0992842	0.0914758	0.0596894	0.0313599	0.0278382	0.00803488	0.0115801	0.0150518	0.00517222
46	Adenoid	COVID	7.2	Male	NA	215972	20408	35631	23540	52902	13599	13453	21916	23310	2395	3345	5113	360	0.0944937	0.16498	0.108996	0.244948	0.0629665	0.0622905	0.101476	0.107931	0.0110894	0.0154881	0.0236744	0.00166688
46	Tonsil	COVID	7.2	Male	NA	186962	42038	18602	48297	23492	17008	11733	6444	13573	1401	1435	2337	602	0.224848	0.0994962	0.258325	0.125651	0.0909704	0.0627561	0.0344669	0.0725976	0.0074935	0.00767536	0.0124999	0.00321991
48	Adenoid	CONTROL	10.9	Male	NA	375941	26715	99825	13197	89582	23064	33654	34454	33277	6697	4880	9889	707	0.0710617	0.265534	0.0351039	0.238287	0.0613501	0.0895194	0.0916474	0.0885165	0.017814	0.0129808	0.0263047	0.00188061
48	Tonsil	CONTROL	10.9	Male	NA	506575	63646	120891	40462	97834	35661	26812	33926	53277	14510	6310	11501	1745	0.12564	0.238644	0.0798737	0.193128	0.0703963	0.052928	0.0669713	0.105171	0.0286433	0.0124562	0.0227034	0.0034447
49	Adenoid	CONTROL	2.7	Male	NA	399114	87488	87325	21642	61598	30450	32349	22378	27905	6717	10912	9079	1271	0.219206	0.218797	0.0542251	0.154337	0.076294	0.081052	0.0560692	0.0699174	0.0168298	0.0273406	0.0227479	0.00318455
49	Tonsil	CONTROL	2.7	Male	NA	313599	93931	60697	41301	27346	25658	22242	8114	11004	3042	12205	7071	988	0.299526	0.19355	0.1317	0.0872005	0.0818179	0.070925	0.0258738	0.0350894	0.00970029	0.0389191	0.0225479	0.00315052
50	Adenoid	COVID	2.9	Female	31	94068	8489	8806	9654	32489	2712	12390	10457	6640	204	559	1524	144	0.0902432	0.0936131	0.102628	0.345378	0.0288302	0.131713	0.111164	0.0705872	0.00216864	0.00594251	0.016201	0.00153081
50	Tonsil	COVID	2.9	Female	31	99216	34856	9770	13899	13531	6234	8788	3266	5365	618	1156	1577	156	0.351314	0.098472	0.140088	0.136379	0.0628326	0.0885744	0.0329181	0.0540739	0.00622883	0.0116513	0.0158946	0.00157233
51	Adenoid	CONTROL	5.7	Male	NA	44815	5084	4082	8731	15089	1454	2110	3139	3828	250	277	734	37	0.113444	0.0910856	0.194823	0.336695	0.0324445	0.0470825	0.0700435	0.0854178	0.00557849	0.00618097	0.0163784	0.000825616
51	Tonsil	CONTROL	5.7	Male	NA	72451	19476	6439	24783	9109	3626	3473	1423	2573	156	384	934	75	0.268816	0.0888739	0.342066	0.125726	0.0500476	0.0479358	0.0196409	0.0355137	0.00215318	0.00530013	0.0128915	0.00103518
52	Tonsil	CONTROL	14.1	Male	NA	54471	9954	5428	7601	12070	5106	1832	3719	6717	648	442	893	61	0.182739	0.0996494	0.139542	0.221586	0.093738	0.0336326	0.0682749	0.123313	0.0118962	0.00811441	0.016394	0.00111986
54	Adenoid	CONTROL	2.3	Female	NA	168406	10393	23862	16246	19253	4421	28890	23293	6196	27770	2944	4888	250	0.061714	0.141693	0.0964692	0.114325	0.026252	0.17155	0.138315	0.036792	0.164899	0.0174816	0.0290251	0.00148451
54	Tonsil	CONTROL	2.3	Female	NA	303576	77450	36320	46458	16949	12742	34876	13404	9781	36814	11570	6241	971	0.255126	0.119641	0.153036	0.0558312	0.041973	0.114884	0.0441537	0.0322193	0.121268	0.0381124	0.0205583	0.00319854
55	Adenoid	CONTROL	10.7	Male	NA	277578	6856	34759	7607	75975	9140	13835	58920	48389	10462	4764	6606	265	0.0246994	0.125222	0.0274049	0.273707	0.0329277	0.0498418	0.212265	0.174326	0.0376903	0.0171627	0.0237987	0.000954687
55	Tonsil	CONTROL	10.7	Male	NA	329432	9225	10497	41218	12701	27652	53337	85775	11114	62685	7049	6684	1495	0.0280027	0.0318639	0.125118	0.0385542	0.0839384	0.161906	0.260372	0.0337369	0.190282	0.0213974	0.0202895	0.00453811
56	Adenoid	CONTROL	2.6	Female	NA	313931	100607	21817	26082	35914	14305	50510	16209	15480	22644	3770	5646	947	0.320475	0.0694962	0.083082	0.114401	0.0455673	0.160895	0.0516324	0.0493102	0.0721305	0.012009	0.0179848	0.00301659
56	Tonsil	CONTROL	2.6	Female	NA	189191	42553	13079	34441	14246	10853	22014	10239	17976	18301	2190	2622	677	0.224921	0.0691312	0.182044	0.0752996	0.0573653	0.116359	0.0541199	0.0950151	0.0967329	0.0115756	0.013859	0.00357839
57	Adenoid	CONTROL	3.2	Male	NA	296891	41204	67527	17459	35470	14122	28350	16110	16177	40539	8174	10321	1438	0.138785	0.227447	0.0588061	0.119471	0.0475663	0.0954896	0.0542623	0.054488	0.136545	0.027532	0.0347636	0.00484353
57	Tonsil	CONTROL	3.2	Male	NA	71788	6799	1985	7534	2659	6583	15225	5872	2668	18637	2706	954	166	0.0947094	0.0276509	0.104948	0.0370396	0.0917006	0.212083	0.0817964	0.037165	0.259612	0.0376943	0.0132891	0.00231236
59	Adenoid	CONTROL	3.5	Male	NA	545485	47715	193080	51226	140254	17124	17821	21604	10273	24427	8638	10127	3196	0.0874726	0.35396	0.0939091	0.257118	0.0313922	0.03267	0.0396051	0.0188328	0.0447803	0.0158354	0.0185651	0.00585901
59	Tonsil	CONTROL	3.5	Male	NA	207153	39460	41622	51552	34348	4680	10939	4335	7469	2897	7534	1700	617	0.190487	0.200924	0.24886	0.16581	0.022592	0.0528064	0.0209266	0.0360555	0.0139848	0.0363693	0.00820649	0.00297847
62	Tonsil	CONTROL	17	Female	NA	430307	35085	36735	14610	204430	14864	27084	44829	33463	5517	5765	6339	1586	0.0815348	0.0853693	0.0339525	0.475079	0.0345428	0.0629411	0.104179	0.0777654	0.0128211	0.0133974	0.0147313	0.00368574
63	Adenoid	CONTROL	6.9	Male	NA	184206	30872	7975	10325	42454	19698	20430	21267	26231	1541	1624	1297	492	0.167595	0.0432939	0.0560514	0.23047	0.106935	0.110908	0.115452	0.1424	0.00836563	0.00881622	0.00704103	0.00267092
63	Tonsil	CONTROL	6.9	Male	NA	284485	56670	17988	31210	52004	26912	22266	23861	36864	9989	2459	2683	1579	0.199202	0.06323	0.109707	0.1828	0.094599	0.0782677	0.0838744	0.129582	0.0351126	0.00864369	0.00943108	0.00555038
64	Adenoid	CONTROL	3	Female	NA	314365	144463	9841	43062	29269	12151	40881	13178	8257	6201	3908	1431	1723	0.459539	0.0313044	0.136981	0.0931051	0.0386525	0.130043	0.0419194	0.0262656	0.0197255	0.0124314	0.00455203	0.00548089
64	Tonsil	CONTROL	3	Female	NA	353460	124681	3758	57016	17926	18876	49086	25702	9223	30986	11803	2793	1610	0.352744	0.010632	0.161308	0.0507158	0.0534035	0.138873	0.0727154	0.0260935	0.0876648	0.0333927	0.00790188	0.00455497
65	Adenoid	CONTROL	4.5	Male	NA	331391	32875	26090	28001	127956	12793	16610	23935	52674	3943	2512	2423	1579	0.0992031	0.0787288	0.0844954	0.386118	0.0386039	0.0501221	0.0722259	0.158948	0.0118983	0.00758017	0.0073116	0.00476476
65	Tonsil	CONTROL	4.5	Male	NA	269134	74804	10496	37480	38768	18972	13461	27329	15261	25142	3304	2849	1268	0.277943	0.0389992	0.139261	0.144047	0.0704928	0.050016	0.101544	0.0567041	0.0934181	0.0122764	0.0105858	0.00471141
69	Adenoid	COVID	3.4	Female	201	307918	28480	48088	32585	91643	17729	21068	27125	24801	3813	3584	8177	825	0.0924922	0.156171	0.105824	0.297621	0.057577	0.0684208	0.0880916	0.0805442	0.0123832	0.0116395	0.0265558	0.00267928
69	Tonsil	COVID	3.4	Female	201	225878	32697	13779	42346	11091	20849	39660	21043	5731	27332	6073	4866	411	0.144755	0.061002	0.187473	0.0491017	0.092302	0.175582	0.0931609	0.0253721	0.121003	0.0268862	0.0215426	0.00181957
70	Tonsil	COVID	16.4	Male	98	168067	36177	34089	16511	27344	16829	8289	7830	10688	1458	3424	4730	698	0.215253	0.20283	0.0982406	0.162697	0.100133	0.0493196	0.0465886	0.0635937	0.00867511	0.0203728	0.0281435	0.00415311
71	Adenoid	COVID	6.2	Female	71	363799	27151	33664	29828	83208	17426	37089	61390	40938	20963	4671	5937	1534	0.0746319	0.0925346	0.0819903	0.22872	0.0479001	0.101949	0.168747	0.112529	0.0576225	0.0128395	0.0163195	0.00421661
71	Tonsil	COVID	6.2	Female	71	165153	4352	373	17713	1176	11208	47685	47815	2223	27382	1928	2735	563	0.0263513	0.00225851	0.107252	0.00712067	0.0678643	0.288732	0.289519	0.0134602	0.165798	0.011674	0.0165604	0.00340896
72	Adenoid	CONTROL	7.7	Female	NA	226430	23087	44038	8392	53875	9138	19725	22858	22373	15042	4245	3262	395	0.101961	0.194488	0.0370622	0.237932	0.0403568	0.087113	0.10095	0.0988076	0.0664311	0.0187475	0.0144062	0.00174447
72	Tonsil	CONTROL	7.7	Female	NA	379333	51969	22897	27528	30942	15776	30889	48750	13508	114067	12018	9181	1808	0.137001	0.0603612	0.0725695	0.0815695	0.0415888	0.0814298	0.128515	0.0356099	0.300704	0.0316819	0.024203	0.00476626
73	Adenoid	CONTROL	5.8	Male	NA	156269	20125	21509	21993	24237	12013	11505	13637	18013	8987	1697	2305	248	0.128784	0.137641	0.140738	0.155098	0.0768739	0.073623	0.0872662	0.115269	0.0575098	0.0108595	0.0147502	0.00158701
73	Tonsil	CONTROL	5.8	Male	NA	255542	6616	850	48197	814	17593	63542	33661	4606	65261	9121	4181	1100	0.0258901	0.00332626	0.188607	0.00318539	0.0688458	0.248656	0.131724	0.0180244	0.255383	0.0356928	0.0163613	0.00430458
74	Tonsil	CONTROL	14.6	Male	NA	216901	1634	455	31043	1217	16562	31084	84213	4908	36193	5208	3942	442	0.00753339	0.00209773	0.143121	0.00561085	0.0763574	0.14331	0.388255	0.0226278	0.166864	0.024011	0.0181742	0.0020378
77	Adenoid	CONTROL	9.6	Female	NA	231148	6127	58129	8395	51213	10151	12313	42017	28515	3973	2796	7351	168	0.0265068	0.25148	0.0363187	0.221559	0.0439156	0.0532689	0.181775	0.123363	0.0171881	0.0120961	0.0318021	0.000726807
77	Tonsil	CONTROL	9.6	Female	NA	316835	31724	91549	21789	48331	25162	15112	32540	28357	3599	4264	13726	682	0.100128	0.288949	0.0687708	0.152543	0.0794167	0.0476968	0.102703	0.0895008	0.0113592	0.0134581	0.0433222	0.00215254
78	Adenoid	CONTROL	3.5	Male	NA	277380	42711	13493	24640	104256	2893	18888	20158	0	44403	2553	1678	1707	0.15398	0.0486445	0.0888312	0.37586	0.0104297	0.0680943	0.0726729	0	0.16008	0.00920398	0.00604946	0.00615401
80	Adenoid	CONTROL	7.5	Male	NA	3308	562	0	176	538	112	911	578	12	298	21	14	86	0.169891	0	0.0532044	0.162636	0.0338573	0.275393	0.174728	0.00362757	0.0900846	0.00634825	0.00423216	0.0259976
81	Adenoid	CONTROL	3.4	Female	NA	438708	49011	199869	18678	48588	17245	12173	17449	23226	6556	13316	30746	1851	0.111717	0.455585	0.042575	0.110752	0.0393086	0.0277474	0.0397736	0.0529418	0.0149439	0.0303528	0.0700831	0.00421921
81	Tonsil	CONTROL	3.4	Female	NA	92194	20780	30427	5304	12826	3889	2664	2291	4985	2016	2316	4235	461	0.225394	0.330032	0.0575309	0.13912	0.0421828	0.0288956	0.0248498	0.0540708	0.0218669	0.0251209	0.0459357	0.00500033
82	Adenoid	CONTROL	6.9	Male	NA	63077	7598	2468	3057	22204	4349	4804	9254	7998	298	514	479	54	0.120456	0.0391268	0.0484646	0.352014	0.0689475	0.0761609	0.14671	0.126797	0.00472438	0.00814877	0.00759389	0.000856097
82	Tonsil	CONTROL	6.9	Male	NA	200451	57659	10145	33166	35611	17556	12157	7756	20698	843	2642	1553	665	0.287646	0.0506109	0.165457	0.177654	0.0875825	0.0606482	0.0386927	0.103257	0.00420552	0.0131803	0.00774753	0.00331752
83	Adenoid	CONTROL	3.7	Female	NA	276476	83104	17673	26062	58701	14424	26711	15486	23580	4489	3534	1914	798	0.300583	0.0639224	0.094265	0.212319	0.0521709	0.0966124	0.0560121	0.0852877	0.0162365	0.0127823	0.00692284	0.00288633
83	Tonsil	CONTROL	3.7	Female	NA	197126	65383	16239	32842	24428	18997	10791	5652	15689	1581	3183	1660	681	0.331681	0.0823788	0.166604	0.123921	0.0963698	0.0547416	0.028672	0.0795887	0.00802025	0.016147	0.00842101	0.00345464
84	Adenoid	CONTROL	3.2	Male	NA	400235	22459	164482	19972	76125	12843	20829	20749	19269	10536	12309	19657	1005	0.0561145	0.410964	0.0499007	0.190201	0.0320886	0.0520419	0.051842	0.0481442	0.0263245	0.0307544	0.0491136	0.00251102
84	Tonsil	CONTROL	3.2	Male	NA	287578	66691	51963	38899	39146	23809	23738	10172	16251	7666	3732	4963	548	0.231906	0.180692	0.135264	0.136123	0.0827915	0.0825446	0.0353713	0.0565099	0.0266571	0.0129773	0.0172579	0.00190557
85	Adenoid	CONTROL	5.1	Female	NA	344042	23405	93213	23341	72390	12765	26510	30823	38146	10116	4367	7714	1252	0.0680295	0.270935	0.0678435	0.21041	0.037103	0.0770545	0.0895908	0.110876	0.0294034	0.0126932	0.0224217	0.00363909
85	Tonsil	CONTROL	5.1	Female	NA	260853	51069	79179	29888	21645	15674	19667	8768	10503	12854	4643	5693	1270	0.195777	0.303539	0.114578	0.0829778	0.0600875	0.075395	0.0336128	0.0402641	0.0492768	0.0177993	0.0218246	0.00486864
86	Adenoid	CONTROL	5.3	Female	NA	460833	77051	32902	45362	112168	19013	65180	37986	54271	2029	6356	5886	2629	0.167199	0.0713968	0.0984348	0.243403	0.0412579	0.14144	0.082429	0.117767	0.0044029	0.0137924	0.0127725	0.00570489
86	Tonsil	CONTROL	5.3	Female	NA	269021	106362	14239	36263	35321	22243	23604	8689	14899	914	2962	2805	720	0.395367	0.052929	0.134796	0.131295	0.0826813	0.0877404	0.0322986	0.0553823	0.0033975	0.0110103	0.0104267	0.00267637
87	Adenoid	COVID	6	Male	NA	441397	27477	83180	46307	87512	21554	48658	57171	42717	6006	8504	10938	1373	0.0622501	0.188447	0.10491	0.198261	0.0488313	0.110236	0.129523	0.0967768	0.0136068	0.0192661	0.0247804	0.00311058
87	Tonsil	COVID	6	Male	NA	314309	83623	43790	60584	34206	25315	22321	12117	20093	1445	4475	5916	424	0.266053	0.139321	0.192753	0.108829	0.0805418	0.0710161	0.0385512	0.0639275	0.00459739	0.0142376	0.0188222	0.00134899
89	Adenoid	COVID	12.1	Female	NA	213304	39959	20222	11376	54952	12960	29431	27489	10999	779	2066	2257	814	0.187334	0.0948037	0.0533323	0.257623	0.0607584	0.137977	0.128872	0.0515649	0.00365206	0.00968571	0.0105811	0.00381615
89	Tonsil	COVID	12.1	Female	NA	220497	35937	50908	13546	31650	25708	15640	16470	17070	1959	7059	3809	741	0.162982	0.230878	0.0614339	0.143539	0.116591	0.0709307	0.0746949	0.077416	0.00888447	0.032014	0.0172746	0.00336059
90	Adenoid	CONTROL	3.1	Male	NA	560069	49477	46026	49781	188004	18556	45095	73152	54153	22028	6911	4858	2028	0.0883409	0.0821792	0.0888837	0.33568	0.0331316	0.0805169	0.130612	0.0966899	0.0393309	0.0123396	0.00867393	0.00362098
91	Adenoid	COVID	9.2	Male	NA	207335	39622	9297	16960	44136	10863	27581	27180	23569	3333	1976	2293	525	0.191101	0.0448405	0.0818	0.212873	0.0523935	0.133026	0.131092	0.113676	0.0160754	0.00953047	0.0110594	0.00253213
91	Tonsil	COVID	9.2	Male	NA	155059	29555	16935	19875	14564	15554	23258	8720	14904	6957	1867	2616	254	0.190605	0.109216	0.128177	0.0939255	0.10031	0.149995	0.0562367	0.0961183	0.0448668	0.0120406	0.016871	0.00163809
94	Adenoid	CONTROL	3	Male	NA	98946	15778	21263	7742	13131	4837	9650	6003	5080	10225	2037	2869	331	0.159461	0.214895	0.0782447	0.132709	0.0488853	0.0975279	0.0606695	0.0513411	0.103339	0.020587	0.0289956	0.00334526
94	Tonsil	CONTROL	3	Male	NA	122175	28528	33840	15258	15059	8465	4542	2137	7276	1377	2704	2826	163	0.233501	0.27698	0.124886	0.123258	0.0692859	0.0371762	0.0174913	0.0595539	0.0112707	0.0221322	0.0231308	0.00133415
95	Adenoid	CONTROL	3.3	Male	NA	283097	14759	110668	15531	49382	9748	15684	22399	17582	14365	3583	7931	1465	0.0521341	0.390919	0.0548611	0.174435	0.0344334	0.0554015	0.0791213	0.0621059	0.0507423	0.0126564	0.0280151	0.0051749
95	Tonsil	CONTROL	3.3	Male	NA	268720	55520	80584	39639	22926	22222	14348	4543	11124	3585	7292	5688	1249	0.206609	0.299881	0.14751	0.0853156	0.0826957	0.0533939	0.0169061	0.0413962	0.013341	0.0271361	0.021167	0.00464796
96	Tonsil	CONTROL	11.9	Male	NA	187353	6517	1495	20850	2735	19268	44110	44060	4104	35373	2551	5541	749	0.0347846	0.00797959	0.111287	0.0145981	0.102843	0.235438	0.235171	0.0219052	0.188804	0.013616	0.0295752	0.0039978
97	Adenoid	CONTROL	6	Female	NA	161420	13569	23460	16423	38945	8260	27089	13718	11960	2796	1383	3301	516	0.0840602	0.145335	0.101741	0.241265	0.0511709	0.167817	0.0849833	0.0740924	0.0173213	0.00856771	0.0204498	0.00319663
97	Tonsil	CONTROL	6	Female	NA	256146	42751	57006	19558	28910	16648	17900	10830	10472	38317	4944	7402	1408	0.166901	0.222553	0.0763549	0.112865	0.0649942	0.069882	0.0422806	0.0408829	0.14959	0.0193015	0.0288976	0.00549687
98	Tonsil	CONTROL	2.8	Female	NA	154599	52884	28371	21340	9261	13116	14151	2980	3984	1633	3495	3163	221	0.342072	0.183513	0.138035	0.0599034	0.0848388	0.0915336	0.0192757	0.0257699	0.0105628	0.0226069	0.0204594	0.0014295
99	Tonsil	CONTROL	7.1	Male	NA	143669	33974	27667	13699	11145	16959	11261	7714	10118	1065	6335	3544	188	0.236474	0.192575	0.0953511	0.0775741	0.118042	0.0783816	0.0536929	0.0704258	0.00741287	0.0440944	0.0246678	0.00130856

## Sheet: Aden_Tons_B
patient_id	organ	status	age	sex	dpi	total.n	cluster_1	cluster_10	cluster_11	cluster_12	cluster_13	cluster_14	cluster_2	cluster_3	cluster_4	cluster_5	cluster_6	cluster_7	cluster_8	cluster_9	cluster_1_freq	cluster_10_freq	cluster_11_freq	cluster_12_freq	cluster_13_freq	cluster_14_freq	cluster_2_freq	cluster_3_freq	cluster_4_freq	cluster_5_freq	cluster_6_freq	cluster_7_freq	cluster_8_freq	cluster_9_freq
22	Tonsil	COVID	4.1	Male	108	876370	130179	31928	57578	32964	21210	10087	18895	157479	39079	155381	34866	85292	95038	6394	0.148543	0.0364321	0.0657006	0.0376142	0.0242021	0.01151	0.0215605	0.179695	0.0445919	0.177301	0.0397846	0.0973242	0.108445	0.00729601
29	Tonsil	COVID	3.1	Male	NA	1158788	77887	70336	41840	16309	32047	15061	376775	247828	15621	72532	35265	75217	60968	21102	0.0672142	0.0606979	0.0361067	0.0140742	0.0276556	0.0129972	0.325146	0.213868	0.0134805	0.062593	0.0304327	0.0649101	0.0526136	0.0182104
32	Tonsil	COVID	3.6	Female	26	989335	83466	30471	113173	28461	59161	6310	262387	192491	12394	44703	28179	53542	52639	21958	0.0843658	0.0307995	0.114393	0.0287678	0.0597988	0.00637802	0.265216	0.194566	0.0125276	0.0451849	0.0284828	0.0541192	0.0532064	0.0221947
41	Tonsil	COVID	6	Female	NA	1176255	94773	32624	71809	19294	42947	8969	207122	175937	61222	171142	53262	167864	54119	15171	0.0805718	0.0277355	0.0610488	0.0164029	0.0365116	0.00762505	0.176086	0.149574	0.0520482	0.145497	0.045281	0.142711	0.0460096	0.0128977
46	Tonsil	COVID	7.2	Male	NA	809269	67526	30941	75200	20368	24013	8438	0	167138	27039	118449	55711	60435	141741	12270	0.0834407	0.0382333	0.0929234	0.0251684	0.0296725	0.0104267	0	0.20653	0.0334116	0.146365	0.0688411	0.0746785	0.175147	0.0151618
50	Tonsil	COVID	2.9	Female	31	354127	28542	12548	26218	6070	15045	2325	84539	67301	11976	33214	4580	39401	16924	5444	0.0805982	0.0354336	0.0740356	0.0171407	0.0424848	0.00656544	0.238725	0.190048	0.0338184	0.0937912	0.0129332	0.111262	0.0477908	0.015373
69	Tonsil	COVID	3.4	Female	201	889154	94571	33318	60091	19252	24579	5196	137283	197618	21133	60308	20203	63330	51520	100752	0.106361	0.0374716	0.0675822	0.021652	0.0276431	0.00584376	0.154397	0.222254	0.0237675	0.0678263	0.0227216	0.071225	0.0579427	0.113312
70	Tonsil	COVID	16.4	Male	98	1422117	238134	26106	81035	55189	33473	14507	307469	176408	81298	65102	28448	160134	123265	31549	0.16745	0.0183571	0.056982	0.0388076	0.0235374	0.010201	0.216205	0.124046	0.0571669	0.0457782	0.020004	0.112603	0.0866771	0.0221845
71	Tonsil	COVID	6.2	Female	71	831419	95693	28809	41316	18674	12264	10656	0	77301	26466	75451	43293	17292	68629	315575	0.115096	0.0346504	0.0496934	0.0224604	0.0147507	0.0128166	0	0.0929748	0.0318323	0.0907497	0.0520712	0.0207982	0.0825444	0.379562
87	Tonsil	COVID	6	Male	NA	650364	49368	29820	42559	18973	23152	5085	114323	155515	41985	60780	9664	61418	30885	6837	0.0759083	0.0458512	0.0654387	0.0291729	0.0355985	0.0078187	0.175783	0.23912	0.0645562	0.0934554	0.0148594	0.0944363	0.0474888	0.0105126
89	Tonsil	COVID	12.1	Female	NA	543350	48767	19076	22334	7186	7911	6713	170797	55141	26393	34222	8359	64335	57784	14332	0.0897525	0.0351081	0.0411043	0.0132254	0.0145597	0.0123548	0.314341	0.101483	0.0485746	0.0629833	0.0153842	0.118404	0.106348	0.0263771
91	Tonsil	COVID	9.2	Male	NA	685930	30769	23575	25455	11755	16919	9977	71134	69235	46767	123135	18706	84673	126002	27828	0.0448573	0.0343694	0.0371102	0.0171373	0.0246658	0.0145452	0.103704	0.100936	0.0681804	0.179515	0.027271	0.123443	0.183695	0.0405697
96	Tonsil	CONTROL	11.9	Male	NA	861364	29904	33353	86927	15934	14004	15112	81945	147123	18914	52463	13030	57969	40906	253780	0.034717	0.0387211	0.100918	0.0184986	0.0162579	0.0175443	0.095134	0.170802	0.0219582	0.0609069	0.0151272	0.0672991	0.0474898	0.294626
100	Tonsil	COVID	4.7	Female	25	461933	63232	20311	14926	9939	11940	3163	51848	96414	25103	35654	28927	42761	48875	8840	0.136886	0.0439696	0.032312	0.0215161	0.0258479	0.00684731	0.112241	0.208719	0.0543434	0.0771844	0.0626216	0.0925697	0.105805	0.019137
101	Tonsil	COVID	4.6	Male	NA	412786	58051	13659	53530	9764	10133	2432	49243	81816	14991	30508	10795	34754	38144	4966	0.140632	0.0330898	0.12968	0.0236539	0.0245478	0.00589167	0.119294	0.198204	0.0363166	0.0739075	0.0261516	0.0841937	0.0924062	0.0120304
102	Tonsil	COVID	6	Male	35	375541	80036	6856	24210	11794	10225	2644	24697	75579	23512	35557	10915	34497	27562	7457	0.213122	0.0182563	0.064467	0.0314054	0.0272274	0.00704051	0.0657638	0.201254	0.0626083	0.0946821	0.0290647	0.0918595	0.0733928	0.0198567
97	Tonsil	CONTROL	6	Female	NA	896166	64479	19313	29467	8285	19074	16732	63474	126395	30218	97307	20748	340601	36131	23942	0.0719498	0.0215507	0.0328812	0.00924494	0.021284	0.0186706	0.0708284	0.14104	0.0337192	0.108581	0.023152	0.380065	0.0403173	0.026716
39	Tonsil	CONTROL	16.1	Male	NA	779168	50704	11818	70565	19464	26234	15542	166902	72573	11006	10807	6368	82612	15313	219260	0.0650745	0.0151675	0.0905646	0.0249805	0.0336692	0.0199469	0.214205	0.0931417	0.0141253	0.0138699	0.00817282	0.106026	0.019653	0.281403
20	Tonsil	CONTROL	8.2	Male	NA	1014020	149469	52890	27540	31954	32506	10472	82552	235145	74975	38708	27229	143208	25286	82086	0.147402	0.0521587	0.0271592	0.0315122	0.0320566	0.0103272	0.0814106	0.231894	0.0739384	0.0381728	0.0268525	0.141228	0.0249364	0.0809511
21	Tonsil	CONTROL	1.7	Female	NA	598115	33087	40998	13605	4232	19902	9987	77942	63852	7051	7357	15389	12074	1442	291197	0.0553188	0.0685453	0.0227465	0.00707556	0.0332745	0.0166975	0.130313	0.106755	0.0117887	0.0123003	0.0257292	0.0201868	0.00241091	0.486858
23	Tonsil	CONTROL	2.9	Male	NA	632617	53716	26900	59864	9228	17001	6823	25151	159491	28835	80891	22913	80113	50752	10939	0.0849108	0.0425218	0.0946291	0.014587	0.0268741	0.0107854	0.0397571	0.252113	0.0455805	0.127867	0.0362194	0.126637	0.0802255	0.0172917
24	Tonsil	CONTROL	2	Male	NA	947680	54490	33290	63635	10240	36952	15190	166004	157573	35538	105896	12092	168410	57002	31368	0.0574983	0.0351279	0.0671482	0.0108053	0.0389921	0.0160286	0.175169	0.166272	0.0375	0.111742	0.0127596	0.177708	0.060149	0.0330998
28	Tonsil	CONTROL	4.3	Female	NA	967027	76021	42171	51171	21819	49811	11508	354131	147584	29497	44867	22943	44127	30803	40574	0.0786131	0.0436089	0.0529158	0.022563	0.0515094	0.0119004	0.366206	0.152616	0.0305028	0.0463968	0.0237253	0.0456316	0.0318533	0.0419575
31	Tonsil	CONTROL	11.2	Female	NA	791109	83906	35430	122205	39377	15306	5931	135012	133661	38354	20924	15340	22009	11625	112029	0.106061	0.0447852	0.154473	0.0497744	0.0193475	0.00749707	0.170662	0.168954	0.0484813	0.0264489	0.0193905	0.0278204	0.0146946	0.14161
34	Tonsil	CONTROL	13.8	Male	NA	634921	68776	23087	31448	21009	28747	5506	120100	93522	42534	41474	6127	115230	29045	8316	0.108322	0.036362	0.0495306	0.0330892	0.0452765	0.00867195	0.189157	0.147297	0.066991	0.0653215	0.00965002	0.181487	0.0457458	0.0130977
35	Tonsil	CONTROL	18	Female	NA	886190	72786	51024	93787	29408	13820	8527	163866	94611	45815	93064	8562	127577	45812	37531	0.0821336	0.0575768	0.105832	0.0331848	0.0155948	0.00962209	0.184911	0.106762	0.0516988	0.105016	0.00966158	0.143961	0.0516955	0.042351
36	Tonsil	CONTROL	12	Male	NA	1009385	121927	18582	82579	25393	27189	11500	175332	173749	46474	74681	21773	158851	55131	16224	0.120793	0.0184092	0.0818112	0.0251569	0.0269362	0.0113931	0.173702	0.172134	0.0460419	0.0739866	0.0215706	0.157374	0.0546184	0.0160732
42	Tonsil	CONTROL	7.6	Female	NA	1159215	120444	28834	36413	17986	89358	14197	203572	306881	32675	65110	23144	112288	90807	17506	0.103901	0.0248737	0.0314118	0.0155157	0.0770849	0.0122471	0.175612	0.264732	0.0281872	0.0561673	0.0199652	0.0968656	0.0783349	0.0151016
44	Tonsil	CONTROL	4.6	Male	NA	842452	68887	17436	153841	20043	19574	8406	1298	225097	23198	58954	40336	83115	113309	8958	0.0817696	0.0206967	0.182611	0.0237913	0.0232346	0.00997802	0.00154074	0.267193	0.0275363	0.0699791	0.0478793	0.0986584	0.134499	0.0106332
45	Tonsil	CONTROL	4.3	Female	NA	1211567	86515	57382	51726	11704	54552	13808	12911	230890	20254	190047	119904	97703	247722	16449	0.0714075	0.0473618	0.0426935	0.00966022	0.045026	0.0113968	0.0106564	0.190571	0.0167172	0.15686	0.098966	0.0806418	0.204464	0.0135766
48	Tonsil	CONTROL	10.9	Male	NA	489603	87426	19862	57688	35744	22737	3198	24229	87030	18514	18181	22157	31803	55555	5479	0.178565	0.0405676	0.117826	0.0730061	0.0464397	0.00653182	0.049487	0.177756	0.0378143	0.0371342	0.045255	0.0649567	0.113469	0.0111907
49	Tonsil	CONTROL	2.7	Male	NA	418921	29487	50735	22155	4241	10367	7179	24642	57482	18495	60646	28048	69134	26674	9636	0.070388	0.121109	0.0528859	0.0101236	0.0247469	0.0171369	0.0588225	0.137214	0.0441491	0.144767	0.066953	0.165029	0.0636731	0.023002
51	Tonsil	CONTROL	5.7	Male	NA	355274	31165	20147	33198	8140	7825	4259	74954	83615	12528	22820	5777	26590	21777	2479	0.087721	0.0567083	0.0934434	0.0229119	0.0220253	0.0119879	0.210975	0.235354	0.0352629	0.0642321	0.0162607	0.0748436	0.0612964	0.00697771
52	Tonsil	CONTROL	14.1	Male	NA	146773	10576	2206	7412	3885	3190	1693	59776	13197	7744	9004	1935	13582	11266	1307	0.0720568	0.01503	0.0504998	0.0264694	0.0217342	0.0115348	0.407268	0.0899144	0.0527617	0.0613464	0.0131836	0.0925375	0.076758	0.00890491
54	Tonsil	CONTROL	2.3	Female	NA	983746	37156	59131	50633	8973	39226	11263	248160	172466	35625	105850	16596	104761	65909	27997	0.0377699	0.060108	0.0514696	0.00912126	0.0398741	0.0114491	0.25226	0.175316	0.0362136	0.107599	0.0168702	0.106492	0.066998	0.0284596
55	Tonsil	CONTROL	10.7	Male	NA	1087373	106791	26580	117565	27557	27630	14191	283399	96812	59477	44079	8744	109079	14019	151450	0.0982101	0.0244442	0.108118	0.0253427	0.0254099	0.0130507	0.260627	0.0890329	0.0546979	0.0405371	0.0080414	0.100314	0.0128925	0.139281
56	Tonsil	CONTROL	2.6	Female	NA	738258	69652	14632	44789	11874	19208	8597	196546	116995	21890	69239	6133	110608	21002	27093	0.0943464	0.0198196	0.0606685	0.0160838	0.026018	0.011645	0.266229	0.158474	0.0296509	0.093787	0.00830739	0.149823	0.028448	0.0366986
57	Tonsil	CONTROL	3.2	Male	NA	551672	82686	16805	33008	20509	32872	6128	63575	80051	33001	40196	8698	26948	26997	80198	0.149883	0.0304619	0.0598327	0.0371761	0.0595861	0.011108	0.115241	0.145106	0.05982	0.0728621	0.0157666	0.0488479	0.0489367	0.145373
59	Tonsil	CONTROL	3.5	Male	NA	1327925	87149	65637	85043	7070	66871	9708	0	434922	29604	167596	129888	71965	160001	12471	0.065628	0.0494282	0.064042	0.0053241	0.0503575	0.00731065	0	0.32752	0.0222934	0.126209	0.0978128	0.0541936	0.120489	0.00939134
62	Tonsil	CONTROL	17	Female	NA	868029	112654	9570	17128	40201	16319	7930	0	56382	20010	79093	350187	57051	97492	4012	0.129781	0.011025	0.0197321	0.046313	0.0188001	0.00913564	0	0.0649541	0.0230522	0.0911179	0.403428	0.0657248	0.112314	0.00462197
63	Tonsil	CONTROL	6.9	Male	NA	947806	121518	33752	91475	36317	22310	11640	7529	164438	42992	55286	65026	196927	81471	17125	0.12821	0.0356107	0.0965124	0.0383169	0.0235386	0.012281	0.00794361	0.173493	0.0453595	0.0583305	0.0686069	0.207771	0.0859575	0.018068
64	Tonsil	CONTROL	3	Female	NA	934265	50406	152218	45985	6655	27642	10711	4143	154050	41545	103213	93808	87949	94190	61750	0.0539526	0.162928	0.0492205	0.00712325	0.0295869	0.0114646	0.0044345	0.164889	0.0444681	0.110475	0.100408	0.0941371	0.100817	0.0660947
65	Tonsil	CONTROL	4.5	Male	NA	1064806	70793	70574	53470	18607	15620	14184	2496	109871	62362	210187	65867	115587	222746	32442	0.0664844	0.0662787	0.0502157	0.0174745	0.0146693	0.0133207	0.00234409	0.103184	0.0585665	0.197395	0.0618582	0.108552	0.209189	0.0304675
72	Tonsil	CONTROL	7.7	Female	NA	913226	89815	18916	49956	24704	13713	11685	0	107629	49883	110914	71663	175877	164781	23690	0.0983491	0.0207134	0.0547028	0.0270514	0.015016	0.0127953	0	0.117856	0.0546228	0.121453	0.0784724	0.192589	0.180438	0.025941
73	Tonsil	CONTROL	5.8	Male	NA	688391	76305	18981	25880	13367	46784	5446	1185	185080	19415	11757	14797	4981	10826	253587	0.110845	0.027573	0.0375949	0.0194177	0.0679614	0.0079112	0.00172141	0.268859	0.0282034	0.017079	0.0214951	0.00723571	0.0157265	0.368376
74	Tonsil	CONTROL	14.6	Male	NA	615793	54209	7573	28829	12646	10436	7974	0	83971	17877	45173	13136	7000	34232	292737	0.0880312	0.012298	0.0468161	0.0205361	0.0169473	0.0129492	0	0.136362	0.0290309	0.0733574	0.0213318	0.0113675	0.0555901	0.475382
77	Tonsil	CONTROL	9.6	Female	NA	474286	51173	14010	40859	20247	10572	7055	45032	50781	76150	37555	18230	37143	54345	11134	0.107895	0.0295391	0.0861484	0.0426894	0.0222903	0.014875	0.0949469	0.107068	0.160557	0.0791822	0.0384367	0.0783135	0.114583	0.0234753
81	Tonsil	CONTROL	3.4	Female	NA	1137591	80586	59813	30960	18613	35387	22308	69724	198186	27281	157735	29625	168255	203116	36002	0.0708392	0.0525787	0.0272154	0.0163618	0.031107	0.0196099	0.0612909	0.174216	0.0239814	0.138657	0.0260419	0.147905	0.178549	0.0316476
82	Tonsil	CONTROL	6.9	Male	NA	771117	102264	19393	81233	27391	17364	5462	8287	103863	29359	82683	43829	123987	116570	9432	0.132618	0.0251492	0.105345	0.0355212	0.022518	0.00708323	0.0107467	0.134692	0.0380733	0.107225	0.0568383	0.160789	0.15117	0.0122316
83	Tonsil	CONTROL	3.7	Female	NA	480763	75101	14368	36943	25038	15238	7041	87218	71266	23145	27019	8337	35174	36676	18199	0.156212	0.0298858	0.0768424	0.0520797	0.0316955	0.0146455	0.181416	0.148235	0.0481422	0.0562002	0.0173412	0.0731629	0.0762871	0.0378544
84	Tonsil	CONTROL	3.2	Male	NA	754417	115520	31455	73723	34738	29488	5094	92002	194485	46598	13333	10647	46457	14393	46484	0.153125	0.0416944	0.0977218	0.0460462	0.0390871	0.00675223	0.121951	0.257795	0.0617669	0.0176732	0.0141129	0.06158	0.0190783	0.0616158
85	Tonsil	CONTROL	5.1	Female	NA	747657	90209	26936	67951	23028	38235	5476	114640	193997	36377	25330	12224	86646	9703	16905	0.120656	0.0360272	0.0908853	0.0308002	0.0511398	0.00732421	0.153332	0.259473	0.0486547	0.0338792	0.0163497	0.11589	0.0129779	0.0226106
86	Tonsil	CONTROL	5.3	Female	NA	770914	79719	38238	40628	11674	36224	8113	159276	151507	28887	63850	18637	69198	47691	17272	0.103408	0.0496009	0.0527011	0.0151431	0.0469884	0.0105239	0.206607	0.196529	0.0374711	0.0828238	0.0241752	0.089761	0.0618629	0.0224046
94	Tonsil	CONTROL	3	Male	NA	229042	18269	13411	17238	5256	5916	1461	44496	41295	10422	21446	5083	18065	19148	7536	0.0797627	0.0585526	0.0752613	0.0229478	0.0258293	0.00637874	0.19427	0.180294	0.0455026	0.0936335	0.0221924	0.078872	0.0836004	0.0329023
95	Tonsil	CONTROL	3.3	Male	NA	625021	52311	23534	37192	14080	23069	4410	111127	146167	18413	21367	22156	67034	65244	18917	0.0836948	0.0376531	0.0595052	0.0225272	0.0369092	0.00705576	0.177797	0.233859	0.0294598	0.0341861	0.0354484	0.107251	0.104387	0.0302662
98	Tonsil	CONTROL	2.8	Female	NA	636456	73219	15669	30608	11323	25680	9882	60206	159674	25393	74680	26510	59081	39277	25254	0.115042	0.0246191	0.0480913	0.0177907	0.0403484	0.0155266	0.0945957	0.25088	0.0398975	0.117337	0.0416525	0.0928281	0.061712	0.0396791
99	Tonsil	CONTROL	7.1	Male	NA	789167	134306	21069	42420	59945	11547	10475	89655	99710	69598	87081	10584	84383	46969	21425	0.170187	0.0266978	0.0537529	0.0759598	0.0146319	0.0132735	0.113607	0.126348	0.0881917	0.110345	0.0134116	0.106927	0.0595172	0.0271489
22	Adenoid	COVID	4.1	Male	108	970456	146910	98051	44347	40660	27439	7939	30753	66162	63890	161976	44617	111498	111741	14473	0.151382	0.101036	0.0456971	0.0418978	0.0282743	0.00818069	0.0316892	0.0681762	0.065835	0.166907	0.0459753	0.114892	0.115143	0.0149136
29	Adenoid	COVID	3.1	Male	NA	526827	81868	35472	17598	27250	7667	5991	141640	46211	21301	32137	20566	49474	20611	19041	0.155398	0.0673314	0.0334038	0.0517248	0.0145532	0.0113719	0.268855	0.0877157	0.0404326	0.061001	0.0390375	0.0939094	0.0391229	0.0361428
32	Adenoid	COVID	3.6	Female	26	552766	61571	42327	28596	24485	5132	6556	122288	57870	13723	39527	22090	60442	34618	33541	0.111387	0.0765731	0.0517326	0.0442954	0.00928422	0.0118604	0.221229	0.104692	0.0248261	0.0715077	0.0399627	0.109345	0.0626269	0.0606785
41	Adenoid	COVID	6	Female	NA	909074	81740	59717	52147	23062	24540	6991	105700	53371	73941	174668	20511	136942	79577	16167	0.0899157	0.0656899	0.0573628	0.0253687	0.0269945	0.00769024	0.116272	0.0587092	0.0813366	0.192138	0.0225625	0.150639	0.0875363	0.017784
46	Adenoid	COVID	7.2	Male	NA	390280	49152	10397	6721	23694	5833	4025	915	20283	25349	78354	38055	31940	82654	12908	0.12594	0.0266398	0.017221	0.0607103	0.0149457	0.0103131	0.00234447	0.0519704	0.0649508	0.200764	0.0975069	0.0818387	0.211781	0.0330737
50	Adenoid	COVID	2.9	Female	31	297707	34062	23308	10755	15785	2081	3471	49880	19341	26577	38904	5833	51832	12222	3656	0.114415	0.0782917	0.0361261	0.0530219	0.00699009	0.0116591	0.167547	0.0649666	0.0892723	0.130679	0.0195931	0.174104	0.0410538	0.0122805
69	Adenoid	COVID	3.4	Female	201	896682	159188	37937	25219	58396	5526	8491	129339	42658	64064	144099	17885	113301	70712	19867	0.17753	0.0423082	0.0281248	0.0651245	0.00616272	0.00946935	0.144242	0.0475732	0.0714456	0.160702	0.0199458	0.126356	0.0788596	0.0221561
71	Adenoid	COVID	6.2	Female	71	1050405	184150	66761	17774	66884	6710	11511	2141	41514	65063	196249	125389	82087	168168	16004	0.175313	0.0635574	0.0169211	0.0636745	0.00638801	0.0109586	0.00203826	0.0395219	0.0619409	0.186832	0.119372	0.078148	0.160098	0.015236
87	Adenoid	COVID	6	Male	NA	618261	73682	45516	22482	55808	8809	5970	44781	54136	46603	91222	6317	122434	27796	12705	0.119176	0.0736194	0.0363633	0.0902661	0.014248	0.00965612	0.0724306	0.0875617	0.0753776	0.147546	0.0102174	0.19803	0.0449584	0.0205496
89	Adenoid	COVID	12.1	Female	NA	733883	69671	40182	10566	14462	18951	9655	171514	43934	42259	78899	10343	94405	113582	15460	0.0949348	0.0547526	0.0143974	0.0197061	0.0258229	0.013156	0.233708	0.0598651	0.0575827	0.107509	0.0140935	0.128638	0.154769	0.021066
101	Adenoid	COVID	4.6	Male	NA	452644	87824	31712	15076	20488	8608	1809	39142	36234	21841	33435	36919	46061	57901	15594	0.194024	0.0700595	0.0333065	0.0452629	0.0190172	0.00399652	0.0864741	0.0800497	0.048252	0.073866	0.081563	0.10176	0.127917	0.0344509
20	Adenoid	CONTROL	8.2	Male	NA	510998	136773	23155	14038	35934	15782	5219	38688	46384	55271	29114	12539	69304	20234	8563	0.267659	0.0453133	0.0274717	0.0703212	0.0308847	0.0102133	0.0757107	0.0907714	0.108163	0.0569748	0.0245383	0.135625	0.039597	0.0167574
21	Adenoid	CONTROL	1.7	Female	NA	1178119	52918	55491	76615	22440	10346	29554	152759	17132	24331	168689	48102	384270	102251	33221	0.0449174	0.0471014	0.0650316	0.0190473	0.0087818	0.0250858	0.129663	0.0145418	0.0206524	0.143185	0.0408295	0.326172	0.0867917	0.0281983
23	Adenoid	CONTROL	2.9	Male	NA	744721	91851	55091	32691	21379	20380	9666	18447	64713	66767	116853	17938	140350	67865	20730	0.123336	0.0739754	0.043897	0.0287074	0.027366	0.0129794	0.0247704	0.0868956	0.0896537	0.156908	0.0240869	0.18846	0.0911281	0.0278359
24	Adenoid	CONTROL	2	Male	NA	860413	36669	46375	61422	8749	8877	22369	68599	31542	53259	146263	14169	291268	45895	24957	0.0426179	0.0538985	0.0713866	0.0101684	0.0103171	0.025998	0.079728	0.0366591	0.0618993	0.169992	0.0164677	0.338521	0.0533407	0.0290058
28	Adenoid	CONTROL	4.3	Female	NA	1012113	119648	74692	36095	35935	21347	12181	340988	82488	31277	64267	23781	86769	48778	33867	0.118216	0.0737981	0.035663	0.0355049	0.0210915	0.0120352	0.336907	0.0815008	0.0309027	0.0634979	0.0234964	0.0857305	0.0481942	0.0334617
31	Adenoid	CONTROL	11.2	Female	NA	781478	172544	18409	13050	108896	8233	7016	165450	45043	69175	67256	11506	52094	22731	20075	0.220792	0.0235566	0.0166991	0.139346	0.0105352	0.00897786	0.211714	0.0576382	0.0885182	0.0860626	0.0147234	0.0666609	0.0290872	0.0256885
34	Adenoid	CONTROL	13.8	Male	NA	528818	137796	26577	6821	54711	5843	2658	84415	14947	69072	28864	6767	69564	13134	7649	0.260574	0.0502574	0.0128986	0.103459	0.0110492	0.0050263	0.15963	0.0282649	0.130616	0.0545821	0.0127965	0.131546	0.0248365	0.0144643
36	Adenoid	CONTROL	12	Male	NA	885483	154003	26905	14530	46948	12110	12588	152439	40672	114934	83950	23703	141072	35227	26402	0.17392	0.0303845	0.0164091	0.0530197	0.0136762	0.014216	0.172154	0.045932	0.129798	0.094807	0.0267684	0.159316	0.0397828	0.0298165
42	Adenoid	CONTROL	7.6	Female	NA	918879	142720	24486	31896	46694	24454	14647	181529	54534	84239	111311	21295	95791	62641	22642	0.15532	0.0266477	0.0347119	0.0508163	0.0266129	0.0159401	0.197555	0.0593484	0.0916758	0.121138	0.023175	0.104248	0.0681711	0.0246409
44	Adenoid	CONTROL	4.6	Male	NA	834713	151192	18197	42751	95380	7143	9567	0	72558	51307	90127	26720	114000	133877	21894	0.181131	0.0218003	0.0512164	0.114267	0.00855743	0.0114614	0	0.0869257	0.0614666	0.107974	0.032011	0.136574	0.160387	0.0262294
45	Adenoid	CONTROL	4.3	Female	NA	1010947	75249	62096	26241	17019	17627	10701	8408	97182	36357	190433	105213	127744	218220	18457	0.0744342	0.0614236	0.0259569	0.0168347	0.0174361	0.0105851	0.00831695	0.0961297	0.0359633	0.188371	0.104074	0.126361	0.215857	0.0182571
48	Adenoid	CONTROL	10.9	Male	NA	315006	58618	11514	5859	26901	9597	3843	12278	16273	19364	18150	31242	32122	58035	11210	0.186085	0.0365517	0.0185996	0.0853984	0.0304661	0.0121998	0.038977	0.0516593	0.0614718	0.057618	0.0991791	0.101973	0.184235	0.0355866
49	Adenoid	CONTROL	2.7	Male	NA	558245	60216	35040	7551	8609	13770	9277	26671	28628	24488	99883	49543	106579	68017	19973	0.107867	0.0627681	0.0135263	0.0154215	0.0246666	0.0166182	0.0477765	0.0512821	0.043866	0.178923	0.0887478	0.190918	0.121841	0.0357782
51	Adenoid	CONTROL	5.7	Male	NA	110733	22184	2470	5789	9308	1303	1082	24066	6269	6816	8759	1366	12573	6307	2441	0.200338	0.0223059	0.0522789	0.084058	0.011767	0.00977125	0.217334	0.0566137	0.0615535	0.0791002	0.012336	0.113543	0.0569568	0.022044
54	Adenoid	CONTROL	2.3	Female	NA	607505	41183	33095	4344	18937	3685	6935	121495	14260	55282	109957	8638	126854	43042	19798	0.0677904	0.0544769	0.00715056	0.0311718	0.00606579	0.0114155	0.19999	0.0234731	0.0909984	0.180998	0.0142188	0.208811	0.0708504	0.032589
55	Adenoid	CONTROL	10.7	Male	NA	324516	61149	7607	0	23171	6079	5664	95629	1472	42677	17595	2225	43585	5882	11781	0.188431	0.0234411	0	0.0714017	0.0187325	0.0174537	0.294682	0.00453599	0.13151	0.0542192	0.00685636	0.134308	0.0181255	0.0363033
56	Adenoid	CONTROL	2.6	Female	NA	1109673	98094	87577	24815	18564	13455	19930	345183	67089	45840	154389	63864	131660	20120	19093	0.088399	0.0789214	0.0223624	0.0167293	0.0121252	0.0179602	0.311067	0.0604584	0.0413095	0.13913	0.0575521	0.118648	0.0181315	0.017206
57	Adenoid	CONTROL	3.2	Male	NA	1446270	254991	62976	35110	88980	26586	15960	80546	73185	173689	349680	20671	147211	98821	17864	0.176309	0.0435437	0.0242762	0.0615238	0.0183825	0.0110353	0.0556922	0.0506026	0.120094	0.241781	0.0142926	0.101787	0.0683282	0.0123518
63	Adenoid	CONTROL	6.9	Male	NA	417675	85864	20681	10227	22100	11336	2448	3042	35462	24895	33656	47118	48492	54992	17362	0.205576	0.0495146	0.0244855	0.052912	0.0271407	0.00586102	0.00728317	0.0849033	0.0596038	0.0805794	0.11281	0.1161	0.131662	0.0415682
64	Adenoid	CONTROL	3	Female	NA	1008978	38111	174037	23910	6708	11428	13623	1925	61087	40348	196109	168446	116873	141645	14728	0.0377719	0.172488	0.0236972	0.00664831	0.0113263	0.0135018	0.00190787	0.0605434	0.039989	0.194364	0.166947	0.115833	0.140385	0.0145969
65	Adenoid	CONTROL	4.5	Male	NA	778134	73769	83753	14333	28594	3145	11282	1516	24898	50572	163575	45073	91134	155496	30994	0.0948024	0.107633	0.0184197	0.0367469	0.00404172	0.0144988	0.00194825	0.0319971	0.0649914	0.210214	0.0579245	0.117119	0.199832	0.0398312
72	Adenoid	CONTROL	7.7	Female	NA	366337	61998	4036	10780	18461	8362	4281	660	10389	24871	52343	35015	51325	70488	13328	0.169238	0.0110172	0.0294265	0.0503935	0.022826	0.011686	0.00180162	0.0283591	0.067891	0.142882	0.0955814	0.140103	0.192413	0.0363818
73	Adenoid	CONTROL	5.8	Male	NA	433946	101515	21424	28434	31153	9725	3207	1024	23334	38304	42095	34004	31013	54073	14641	0.233935	0.0493702	0.0655243	0.07179	0.0224106	0.00739032	0.00235974	0.0537717	0.088269	0.0970052	0.07836	0.0714674	0.124608	0.0337392
77	Adenoid	CONTROL	9.6	Female	NA	176994	29659	7205	536	16532	1757	1875	13685	2170	43531	16734	6400	16932	15541	4437	0.167571	0.0407076	0.00302835	0.0934043	0.00992689	0.0105936	0.077319	0.0122603	0.245946	0.0945456	0.0361594	0.0956643	0.0878052	0.0250686
81	Adenoid	CONTROL	3.4	Female	NA	809072	76567	24722	9488	23486	11293	19203	44626	40380	44719	171884	21491	188314	112707	20192	0.0946356	0.030556	0.011727	0.0290283	0.013958	0.0237346	0.055157	0.049909	0.055272	0.212446	0.0265625	0.232753	0.139304	0.024957
82	Adenoid	CONTROL	6.9	Male	NA	107374	17715	4187	4816	6959	1923	575	496	5866	7035	9704	8451	13008	23572	3067	0.164984	0.0389945	0.0448526	0.0648108	0.0179094	0.00535511	0.00461937	0.0546315	0.0655187	0.0903757	0.0787062	0.121147	0.219532	0.0285637
83	Adenoid	CONTROL	3.7	Female	NA	540879	76893	38819	16742	32370	6642	4621	143491	19584	45604	45685	13395	59732	26198	11103	0.142163	0.0717702	0.0309533	0.059847	0.01228	0.0085435	0.265292	0.0362077	0.0843146	0.0844644	0.0247652	0.110435	0.048436	0.0205277
84	Adenoid	CONTROL	3.2	Male	NA	703010	159332	20672	56876	82725	4925	9095	68371	22120	93925	33829	4793	115544	15627	15176	0.226643	0.029405	0.0809035	0.117673	0.00700559	0.0129372	0.0972547	0.0314647	0.133604	0.0481202	0.00681783	0.164356	0.0222287	0.0215872
85	Adenoid	CONTROL	5.1	Female	NA	589195	132036	34007	14972	50580	8139	13007	66558	28458	74138	48164	3528	87435	15203	12970	0.224096	0.0577177	0.0254109	0.0858459	0.0138138	0.0220759	0.112964	0.0482998	0.125829	0.0817454	0.00598783	0.148397	0.025803	0.0220131
86	Adenoid	CONTROL	5.3	Female	NA	774286	111381	49994	21799	26189	18081	9164	149819	32464	61125	118859	13191	95557	50433	16230	0.14385	0.0645679	0.0281537	0.0338234	0.0233518	0.0118354	0.193493	0.0419277	0.0789437	0.153508	0.0170363	0.123413	0.0651348	0.0209612
90	Adenoid	CONTROL	3.1	Male	NA	855853	165771	78276	28093	46699	11934	10453	87049	56338	43089	120954	6198	119736	50979	30284	0.193691	0.0914596	0.0328246	0.0545643	0.013944	0.0122135	0.10171	0.0658267	0.0503463	0.141326	0.0072419	0.139903	0.0595651	0.0353846
94	Adenoid	CONTROL	3	Male	NA	218183	20965	12531	6751	7788	3538	1286	39206	19934	9768	15658	5620	19848	16539	38751	0.0960891	0.0574334	0.0309419	0.0356948	0.0162157	0.00589413	0.179693	0.0913637	0.0447698	0.0717654	0.0257582	0.0909695	0.0758033	0.177608
95	Adenoid	CONTROL	3.3	Male	NA	576987	111875	37407	26640	62517	2796	4696	57323	55779	46151	17845	4259	95660	29239	24800	0.193895	0.0648316	0.0461709	0.108351	0.00484586	0.00813883	0.0993489	0.0966729	0.0799862	0.0309279	0.00738145	0.165792	0.0506753	0.0429819
