# Supplementary material for: Robust, persistent adaptive immune responses to SARS-CoV-2 in the oropharyngeal lymphoid tissue of children
Source: Res Sq. 2022 Mar 23:rs.3.rs-1276578. Preprint. [Version 1] doi: 10.21203/rs.3.rs-1276578/v1 (PMC8963700; doi:10.21203/rs.3.rs-1276578/v1)
Supplement: Supplement 2 [file 0836257f0c69c864c09f52ed.xlsx]

## Sheet: Cluster 2
Supplementary Table 5: DE Genes S1 Positive vs S1 Negative B cells
S1+ vs. S1- B cells in CITE-seq cluster 2
Gene ID	avg log2FC	p value	adjusted p value (FDR)	percent of S1+ cells expressing gene	percent of S1- cells expressing gene
MT-ATP8	1.05534	2.7644e-97	9.0501e-93	0.982	0.965
MT-ATP6	-0.696121	1.95219e-59	6.39108e-55	0.981	0.996
FCGR2B	-0.71512	1.43683e-39	4.70389e-35	0.125	0.39
RPL38	0.318412	5.93009e-30	1.94139e-25	0.92	0.942
FCRLA	-0.572584	2.42302e-25	7.9325e-21	0.358	0.591
HLA-DRB5	0.353103	1.01075e-23	3.309e-19	0.978	0.973
HLA-DRB1	-0.354139	6.74873e-22	2.2094e-17	0.943	0.979
NDUFA11	-0.464439	7.1598e-22	2.34398e-17	0.103	0.283
HLA-DPB1	0.267705	1.00324e-19	3.28441e-15	0.978	0.984
IGJ	-0.410761	1.02145e-18	3.34403e-14	0.067	0.21
RP5-887A10.1	-0.504015	2.09636e-18	6.86305e-14	0.034	0.152
FCRL2	-0.555978	8.77631e-17	2.87319e-12	0.187	0.355
LGALS1	-0.522645	1.00641e-16	3.29477e-12	0.053	0.174
IGLL5	-0.606788	5.96219e-16	1.9519e-11	0.057	0.179
CXCR3	0.425099	1.26516e-15	4.14189e-11	0.273	0.12
CHPT1	-0.316796	2.18807e-15	7.16331e-11	0.09	0.226
HLA-DQA1	0.255772	5.0185e-15	1.64296e-10	0.963	0.956
EEF1G	0.373237	1.60096e-14	5.24123e-10	0.76	0.695
BLOC1S1	-0.274476	1.3397e-13	4.38592e-09	0.102	0.233
CCDC50	-0.440658	1.08928e-12	3.56608e-08	0.314	0.457
MGST3	-0.257828	4.81839e-12	1.57745e-07	0.092	0.205
CBLB	-0.280889	1.1016e-11	3.60643e-07	0.102	0.22
SELL	0.292855	3.80828e-11	1.24675e-06	0.886	0.791
SYK	-0.339495	1.25464e-10	4.10743e-06	0.466	0.614
LENG8	-0.373812	2.48535e-10	8.13653e-06	0.251	0.396
GYPC	0.299	5.12712e-10	1.67852e-05	0.701	0.611
ITM2B	-0.307547	1.08003e-09	3.53581e-05	0.535	0.666
FCRL3	-0.430813	1.4514e-09	4.75159e-05	0.216	0.343
NME1-NME2	0.30621	2.07996e-09	6.80937e-05	0.704	0.642
HOPX	0.382485	3.01215e-09	9.86119e-05	0.333	0.206
ITGB1	-0.427093	3.11807e-09	0.00010208	0.322	0.427
FOSB	-0.378384	5.60453e-09	0.000183481	0.499	0.64
DERL3	-0.271714	7.20802e-09	0.000235976	0.082	0.178
TNFRSF13B	-0.322847	1.27799e-08	0.000418387	0.449	0.582
KLF6	-0.33388	1.40772e-08	0.000460859	0.554	0.674
AC079767.4	-0.40534	7.69611e-08	0.00251955	0.195	0.281
POU2F2	-0.27069	2.30664e-07	0.00755148	0.727	0.8
LINC00926	-0.346465	2.40947e-07	0.00788811	0.495	0.593
SIGLEC10	-0.305879	2.48325e-07	0.00812967	0.236	0.351
SCIMP	0.304745	2.50027e-07	0.00818537	0.658	0.553
MARCKS	-0.270584	3.55606e-07	0.0116418	0.293	0.414
FOXP1	-0.303186	3.67441e-07	0.0120293	0.297	0.411
PDE4D	-0.400694	3.80536e-07	0.012458	0.149	0.238
TCF4	-0.306426	5.82394e-07	0.0190664	0.611	0.697
RFTN1	0.271071	1.00676e-06	0.0329594	0.416	0.311
FCER2	0.314252	1.07407e-06	0.0351629	0.563	0.443
RGS1	-0.291762	1.97405e-06	0.0646265	0.109	0.196
REL	0.290499	3.47272e-06	0.11369	0.794	0.744
SOX4	0.266141	5.07439e-06	0.166125	0.182	0.102
FMNL1	-0.258656	6.5365e-06	0.213992	0.334	0.442
MARCKSL1	0.279998	6.6111e-06	0.216434	0.591	0.503
ENTPD1	-0.29122	6.71832e-06	0.219944	0.291	0.39
GADD45B	-0.317962	9.90432e-06	0.324248	0.278	0.381
CLK1	-0.301355	1.53638e-05	0.502981	0.374	0.481
ARID5B	0.257307	1.71422e-05	0.5612	0.567	0.484
TSC22D3	-0.313947	2.93366e-05	0.960422	0.676	0.733
HSPA1A	0.373843	0.0163232	1	0.278	0.278
XPO6	0.313608	0.336186	1	0.138	0.14
SLAMF1	0.313492	3.82061e-05	1	0.327	0.246
SYNE2	0.290243	3.21973e-05	1	0.289	0.198
SPTBN1	0.283161	0.0030749	1	0.298	0.252
PAG1	0.275902	0.000115363	1	0.413	0.333
PARP14	0.262759	0.000823675	1	0.488	0.448
ITGB2-AS1	0.260644	0.000406105	1	0.417	0.327
FAM129A	0.259062	5.52173e-05	1	0.194	0.124
SETD2	0.253056	0.0140283	1	0.333	0.325
IFITM1	0.251306	0.000142308	1	0.682	0.637
AFF3	-0.259337	4.13999e-05	1	0.295	0.39
JUN	-0.263563	0.00025194	1	0.816	0.862
CD69	-0.263882	0.00103128	1	0.349	0.434
CXCR4	-0.266486	4.58212e-05	1	0.662	0.741
GSTP1	-0.29463	0.000214806	1	0.314	0.396
SNRPB2	-0.302811	0.000146424	1	0.259	0.344
