# Supplementary material for: Robust, persistent adaptive immune responses to SARS-CoV-2 in the oropharyngeal lymphoid tissue of children
Source: Res Sq. 2022 Mar 23:rs.3.rs-1276578. Preprint. [Version 1] doi: 10.21203/rs.3.rs-1276578/v1 (PMC8963700; doi:10.21203/rs.3.rs-1276578/v1)
Supplement: Supplement 3 [file 0d42557da2d63a33cf47c9bd.xlsx]

## Sheet: S1+RBD+ B cell flow panel
Number	Reagent	Source	Catalog number	Clone
1	Anti-CD11c-BUV395	BD	563787	B-ly6
2	Anti-CD71-BUV661	BD	749818	L01.1
3	Anti-CD138-BUV737	BD	612834	MI15
4	Anti-CD45-BUV805	BD	612891	HI30
5	Anti-CD62L-BV750	BD	747422	DREG-56
6	Anti-FCRL5/FCRL3-AF647	BD	564343	307307
7	Anti-CD86-AF700	BD	561124	2331 (FUN-1)
8	Anti-CD20-APC-H7	BD	560734	2H7
9	Anti-CD10-BV510	BD	563032	HI10a
10	Anti-CD19-BV650	BD	563226	SJ25C1
11	Anti-CD95-PE-Cy5	BD	340480	DX2
12	Anti-IgG-PE-Cy7	BD	561298	G18-145
13	Anti-CD3-BV570	BioLegend	300436	UCHT1
14	Anti-IgD-BV605	BioLegend	348232	IA6-2
15	Anti-IgM-BV711	BioLegend	314540	MHM-88
16	Anti-CD27-BV785	BioLegend	302832	O323
17	Anti-CD14-Spark Blue 550	BioLegend	367148	63D3
18	Anti-CD21-FITC	BioLegend	354910	Bu32
19	Live dead dye-Zombie NIR	BioLegend	423106
20	CoV2-RBD-Biotin	BioLegend	793906
21	SAv-BV421	BioLegend	405225
22	CoV2-S1-Biotin	BioLegend	793806
23	Anti-CD38-APC-Fire810	BioLgend	303550	HIT2
24	Anti-IgA-VioBlue	Miltenyi	130-113-479	IS11-8E10
25	SAv-APC	ThermoFisher	S32362
26	Anti-CD85j-Super bright 436	ThermoFisher	62-5129-42	HP-F1
27	Anti-FCRL4-PerCP-eFluor710	ThermoFisher	46-3079-42	413D12

## Sheet: 37c broad immune flow panel
Number	Reagent	Source	Catalog Number	Clone
1	Anti-CD141-BB515	BD	566017	1A4
2	Anti-CD16-BUV496	BD	612944	3G8
3	Anti-TCR γδ-BB700	BD	745944	11F2
4	Anti-CD11c-BUV661	BD	612967	B-ly6
5	Anti-IgG-BV605	BD	563246	G18-145
6	Anti-CD127-APC-R700	BD	565185	HIL-7R-M21
7	Anti-IgD-BV480	BD	566138	IA6-2
8	Anti-CD56-BUV737	BD	612766	NCAM16.2
9	Anti-CXCR5-BV750	BD	747111	RF8B2
10	Anti-CD8-BUV805	BD	612889	SK1
11	Anti-ICOS-BUV563	BD	741421	DX29
12	Anti-CD45RA-BUV395	BD	740315	5H9
13	SAv-BUV615	BD	613013
14	Anti-CD14-Spark Blue 550	BioLegend	367148	63D3
15	Anti-CD25-PE	BioLegend	302606	BC96
16	Anti-CD28-BV650	BioLegend	302946	CD28.2
17	Anti-CD183-PE-Cy7	BioLegend	353720	G025H7
18	Anti-PD-1-BV785	BioLegend	329930	EH12.2H7
19	Anti-CCR6-BV711	BioLegend	353436	G034E3
20	Anti-CCR7-BV421	BioLegend	353208	G043H7
21	Anti-CD19-Spark NIR 685	BioLegend	302270	HIB19
22	Anti-CD38-APC/Fire 810	BioLegend	303550	HIT2
23	Anti-CD57-FITC	BioLegend	359604	HNK-1
24	Anti-CD1c-Alexa Fluor 647	BioLegend	331510	L161
25	Anti-HLA-DR-APC-Fire 750	BioLegend	307658	L243
26	Anti-IgM-BV570	BioLegend	314517	MHM-88
27	Anti-CD24-PE/Dazzle 594	BioLegend	311134	ML5
28	Anti-CD3-BV510	BioLegend	317332	OKT3
29	Anti-CD21-PerCP CY5.5	BioLegend	354908	Bu32
30	Anti-CD4-CF568	Cytek	R7-20041	SK3
31	Anti-IgA-Biotin	Jackson ImmunoResearch	109-066-011	Polyclonal
32	Anti-CD123-Super Bright 436	ThermoFisher	62-1239-42	6H6
33	Anti-CD95-PE-Cy5	ThermoFisher	15-0959-42	DX2
34	Anti-CD45-PerCP	ThermoFisher	MHCD4531	HI30
35	Anti-CD20-Pacific Orange	ThermoFisher	MHCD2030	HI47
36	Anti-CD161-eFluor 450	ThermoFisher	48-1619-42	HP-3G10
37	Anti-CD27-APC	ThermoFisher	17-0279-42	O323
38	Live dead dye-Blue	ThermoFisher	L23105

## Sheet: Imaging
	Reagent				Source	Catalog number	Clone
Number	Panel	Step	Antibodies	Conjugate
1	GC	1	Hoechst 33342	NA	Biotium	40046	NA
2	GC	3	CD20	Alexa Fluor 488	ThermoFisher	53-0202-82	L26
3	GC	3	Ki-67	Biotin	Novus	NB500-170B	Polyclonal
4	GC	4	See Above	Streptavidin Alexa Fluor 532	ThermoFisher	S11224	NA
5	GC	1	CD138	Unconjugated	R&D	AF2780	Polyclonal
6	GC	2	Donkey anti-goat IgG	Alexa Fluor 555	ThermoFisher	A21432	Polyclonal
7	GC	3	CD68	iFluor 594	Caprico Biotechnologies	1064135	KP1
8	GC	1	CD21	Unconjugated	Abcam	Ab240987	SP186
9	GC	2	Donkey anti-rabbit IgG	Alexa Fluor 680	ThermoFisher	A10043	Polyclonal
10	T	1	Hoechst 33342	NA	Biotium	40046	NA
11	T	3	CD57	Unconjugated	BioLegend	359602	HNK-1
12	T	4	Donkey anti-mouse IgM	Alexa Fluor 488	Jackson ImmunoResearch	715-545-020	Polyclonal
13	T	3	Ki-67	Biotin	Novus	NB500-170B	Polyclonal
14	T	4	See Above	Streptavidin iFluor 514	AAT Bioquest	16956	NA
15	T	1	CD8	Unconjugated	ThermoFisher	14-0085-82	C8/144B
16	T	2	Donkey anti-mouse IgG	Alexa Fluor 555	ThermoFisher	A31570	Polyclonal
17	T	1	CD3	Unconjugated	Abcam	Ab205228	SP7
18	T	2	Donkey anti-rabbit IgG	Alexa Fluor 594	ThermoFisher	A21207	Polyclonal
19	T	3	HLA-DR	AF647	Novus	NBP2-47670AF647	LN-3
20	T	1	PD-1	Unconjugated	R&D	AF1086	Polyclonal
21	T	2	Donkey anti-goat IgG	Alexa Fluor 680	ThermoFisher	A-21084	Polyclonal

## Sheet: T cell cytokine panel
	Reagent	Source	Catalog number	Clone
1	Anti-CD45RA-BUV395	BD	740315	5H9
2	Anti-CD56-BUV737	BD	612766	NCAM16.2
3	Anti-CD8-BUV805	BD	612889	SK1
4	Anti-CXCR5-BV750	BD	747111	RF8B2
5	Anti-CD25-BB515	BD	564467	2A3
6	Anti-CD95-BB700	BD	566542	DX2
7	Anti-CD103-BUV661	BD	749993	Ber-ACT8
8	Anti-CD69-BUV563	BD	748764	FN50
9	Anti-CXCR3-PECy5	BD	551128	1C6/CXCR3
10	Anti-Granzyme B-PE	BD	561142	GB11
11	Anti-IL4-PerCP Cy5.5	BD	561234	8D4-8
12	Anti-IL21-Alexa Fluor 647	BD	560493	3A3-N2.1
13	SAv-BUV615	BD	613013
14	Anti-CCR7-BV421	BioLgend	353208	G043H7
15	Anti-CD3-BV510	BioLgend	344828	SK7
16	Anti-CCR6-BV711	BioLgend	353436	G034E3
17	Anti-PD1-BV785	BioLgend	329929	EH12.2H7
18	Anti-CD57-FITC	BioLgend	359604	HNK-1
19	Anti-CD14-Spark Blue 550	BioLgend	367148	63D3
20	Anti-HLA-DR-APC/Fire 750	BioLgend	307658	L243
21	Anti-CD38-APC/Fire810	BioLgend	303550	HIT2
22	Anti-CD19-Spark NIR 685	BioLgend	302270	HIB19
23	Anti-IL17A-BV605	BioLgend	512326	BL168
24	Anti-IL2-BV650	BioLgend	500334	MQ1-17H12
25	Anti-IFNγ-Pacific Blue	BioLgend	502522	4S.B3
26	Anti-IL10-PE/Dazzle 594	BioLgend	506812	JES3-19F1
27	Anti-Perforin-APC	BioLgend	353312	B-D48
28	Anti-TNFa-PE-Cy7	BioLgend	502930	MAb11
29	Anti-CD107a (LAMP-1) -Biotin	BioLgend	328604	H4A3
30	Anti-CD4-CD568	Cytek	R7-20041	SK3
31	Anti-CD45-PerCP	ThermoFisher	MHCD4531	HI30
32	Anti-CD27-Super Bright 436	ThermoFisher	62-0279-42	O323
33	Live dead dye-Blue	ThermoFisher	L23105

## Sheet: AIM assay
Number	Reagent	Source	Catalog number	Clone
1	Anti-CXCR3-PE/Cy5	BD	551128	1C6/CXCR3
2	Anti-CXCR5-BV750	BD	747111	RF8B2
3	Anti-CD45RA-BUV395	BD	740315	5H9
4	Anti-ICOS-BUV563	BD	741421	DX29
5	Anti-CD56-BUV737	BD	612766	NCAM16.2
6	Anti-CD8-BUV805	BD	612889	SK1
7	Anti-CD40L-PE	BD	557299	TRAP1
8	Anti-CD25-PE-CF594	BD	562403	M-A251
9	Anti-CCR7-BV421	BioLegend	353208	G043H7
10	Anti-CCR6-BV711	BioLegend	353436	G034E3
11	Anti-CD4-BV605	BioLegend	317438	OKT4
12	Anti-CD69-BV650	BioLegend	310934	FN50
13	Anti-PD1-BV785	BioLegend	329930	EH12.2H7
14	Anti-CD57-FITC	BioLegend	359604	HNK-1
15	Anti-CD14-Spark Blue 550	BioLegend	367148	63D3
16	Anti-CD45-PerCP	BioLegend	368506	2D1
17	Anti-4-1BB-PeCy7	BioLegend	309818	4B4-1
18	Anti-CD19-Spark NIR 685	BioLegend	302270	HIB19
19	Anti-CD38-APC/Fire 810	BioLegend	303550	HIT2
20	Anti-HLA-DR-APC/Fire 750	BioLegend	307658	L243
21	Anti-OX40-APC	BioLegend	350008	Ber-ACT35
22	Live dead dye- Blue	ThermoFisher	L23105
23	PepTivator SARS-CoV-2 Prot_S+	Miltenyi	130-127-311
24	PepTivator SARS-CoV-2 Prot_S1	Miltenyi	130-127-041
25	PepTivator SARS-CoV-2 Prot_S	Miltenyi	130-126-700
25	PepTivator SARS-CoV-2 Prot_N	Miltenyi	130-126-698
25	PepTivator SARS-CoV-2 Prot_M	Miltenyi	130-126-702
26	CD40 Antibody, anti-human	Miltenyi	130-094-133	130-094-133
27	PHA-L	Millipore	11249738001

## Sheet: Sorting S1+ B cells
Number	Reagent	Source	Catalog number	Clone
1	Anti-CD19-PeCy7	BIoLegend	302216	HIB19
2	Anti-CD56-BV510	BIoLegend	362533	5.1H11
3	Anti-CD14-BV510	BIoLegend	367124	63D3
4	Anti-CD3-Alexa Fluor 488	BIoLegend	317310	OKT3
5	Anti-CD8-PE	BIoLegend	303804	QA18A37
6	Anti-CD95-PE/Dazzle 594	BIoLegend	305634	DX2
7	CoV2-S1-Biotin	BIoLegend	793806
8	SAv-BV421	BIoLegend	405225
9	Anti-CD45-PerCP-Vio 700	Miltenyi	130-110-636	REA747
10	Anti-CD4-APC-eFLuor 780	ThermoFisher	47-0048-42	OKT4
11	Live dead dye-Aqua	ThermoFisher	L34957
12	SAv-APC	ThermoFisher	S32362
	Anti-S1-BV421 was conjugated from Biotin-S1 and SAv-BV421
	Anti-S1-APC was conjugated from Biotin-S1 and SAv-APC

## Sheet: CITEseq antibodies
Supplementary Table 8: Reagents
Number	Reagent	Source	Catalog number	Barcode	Clone
1	TotalSeq™-C0384 anti-human IgD Antibody	BioLegend	348245	CAGTCTCCGTAGAGT	IA6-2
2	TotalSeq™-C0389 anti-human CD38 Antibody	BioLegend	303543	TGTACCCGCTTGTGA	HIT2
3	TotalSeq™-C0154 anti-human CD27 Antibody	BioLegend	302853	GCACTCCTGCATGTA	O323
4	TotalSeq™-C0181 anti-human CD21 Antibody	BioLegend	354923	AACCTAGTAGTTCGG	Bu32
5	TotalSeq™-C0053 anti-human CD11c Antibody	BioLegend	371521	TACGCCTATAACTTG	S-HCL-3
6	TotalSeq™-C0828 anti-human CD307d (FcRL4) Antibody	BioLegend	340213	CGATTTGATCTGCCT	413D12
7	TotalSeq™-C0829 anti-human CD307e (FcRL5) Antibody	BioLegend	340309	TCACGCAGTCCTCAA	509f6
8	TotalSeq™-C0826 anti-human CD307c/FcRL3 Antibody	BioLegend	374413	GCCTAGTTTGAACGC	H5/FcRL3
9	TotalSeq™-C0006 anti-human CD86 Antibody	BioLegend	305447	GTCTTTGTCAGTGCA	IT2.2
10	TotalSeq™-C0147 anti-human CD62L Antibody	BioLegend	304851	GTCCCTGCAACTTGA	DREG-56
11	TotalSeq™-C0146 anti-human CD69 Antibody	BioLegend	310951	GTCTCTTGGCTTAAA	FN50
12	TotalSeq™-C0159 anti-human HLA-DR Antibody	BioLegend	307663	AATAGCGAGCAAGTA	L243
13	TotalSeq™-C0161 anti-human CD11b Antibody	BioLegend	301359	GACAAGTGATCTGCA	ICRF44
14	TotalSeq™-C0359 anti-human CD83 Antibody	BioLegend	305341	CCACTCATTTCCGGT	HB15e
15	TotalSeq™-C0088 anti-human CD279 (PD-1) Antibody	BioLegend	329963	ACAGCGCCGTATTTA	EH12.2H7
16	TotalSeq™-C0168 anti-human CD57 Recombinant Antibody	BioLegend	393321	AACTCCCTATGGAGG	QA17A04
17	TotalSeq™-C0145 anti-human CD103 (Integrin αE) Antibody	BioLegend	350233	GACCTCATTGTGAAT	Ber-ACT8
18	TotalSeq™-C0180 anti-human CD24 Antibody	BioLegend	311143	AGATTCCTTCGTGTT	ML5
19	TotalSeq™-C0140 anti-human CD183 (CXCR3) Antibody	BioLegend	353747	GCGATGGTAGATTAT	G025H7
20	TotalSeq™-C0148 anti-human CD197 (CCR7) Antibody	BioLegend	353251	AGTTCAGTCAACCGA	G043H7
21	TotalSeq™-C0143 anti-human CD196 (CCR6) Antibody	BioLegend	353440	GATCCCTTTGTCACT	G034E3
22	TotalSeq™-C0144 anti-human CD185 (CXCR5) Antibody	BioLegend	356939	AATTCAACCGTCGCC	J252D4
