# Supplementary material for: Robust, persistent adaptive immune responses to SARS-CoV-2 in the oropharyngeal lymphoid tissue of children
Source: Res Sq. 2022 Mar 23:rs.3.rs-1276578. Preprint. [Version 1] doi: 10.21203/rs.3.rs-1276578/v1 (PMC8963700; doi:10.21203/rs.3.rs-1276578/v1)
Supplement: Supplement 5 [file 20babeadc36ccb993e61246b.xlsx]

## Sheet: Summary of the Samples
Supplementary Table 2: Participant Characteristics and Summary of Samples Used in Immune Profiling											Samples Received				Samples used in S1+RBD+ B cell flow cytometry analysis						Samples used in analysis of 37 color broad immunophenotyping flow cytometry panel
Participant ID	Processing Date	Age (years)	Sex	Race	Diagnosis	History of tonsillitis	Taking corticosteroid	Taking loratadine	History of asthma	Evidence of prior COVID-19 by serology or flow	Serum received	Blood received	Tonsil received	Adenoid received	S1+RBD+ B cells found in tonsil	Control for S1+RBD+ B cell analysis in tonsil	S1+RBD+ B cells found in adenoid	Control for S1+RBD+ B cell analysis in adenoid	S1+RBD+ B cells found in PBMC	Control for S1+RBD+ B cell analysis in PBMC	37c panel manual gating - tonsil	37c panel manual gating - adenoid	37c panel manual gating - PBMC	Unsupervised analysis - Tonsil CD4+ T cells	Unsupervised analysis - Tonsil CD8+ T cells	Unsupervised analysis - Tonsil B cells	Unsupervised analysis - Adenoid CD4+ T cells	Unsupervised analysis - Adenoid CD8+ T cells	Unsupervised analysis - Adenoid B cells	Unsupervised analysis - PBMC CD4+ T cells	Unsupervised analysis - PBMC CD8+ T cells	Unsupervised analysis - PBMC B cells
CNMC 001	2020-09-26	2.6	Female	Black	SDB	No				Yes	x	x	x	x							x	x
CNMC 002	2020-09-26	5.5	Male	Black	Mild OSA	No	Inhaled Steroid		Asthma	No	x	x	x	x
CNMC 003	2020-09-26	5.3	Male	White	Mild OSA	Yes	Inhaled Steroid	Loratadine	Asthma	No	x	x	x	x
CNMC 004	2020-09-26	10	Male	White	Chronic tonsillitis	Yes				No	x	x	x
CNMC 005	2020-09-29	7.5	Female	Hispanic	SDB	Yes			Asthma	Yes	x	x	x	x							x	x
CNMC 006	2020-09-30	1.8	Female	White	PFAPA	Yes	Oral steroid			No	x	x	x	x
CNMC 007	2020-10-02	3.1	Male	Hispanic	SDB	No				No	x	x	x	x
CNMC 008	2020-10-03	3.4	Male	Black	Mild OSA	No				Yes	x	x	x	x
CNMC 009	2020-10-03	3.4	Female	Other	SDB	No				No	x	x	x	x
CNMC 010	2020-10-03	4.5	Female	Hispanic	SDB	Yes		Loratadine		No	x	x	x	x
CNMC 011	2020-10-03	8	Male	HIspanic	Mild OSA	Yes			Asthma	Yes	x	x	x	x							x
CNMC 012	2020-10-03	7.1	Female	White	SDB	Yes				No	x	x	x	x
CNMC 013	2020-10-10	2.2	Male	Hispanic	SDB	Yes	Inhaled Steroid			No	x	x	x	x							x	x
CNMC 014	2020-10-16	3.5	Male	Other	SDB	No				No	x	x	x	x							x	x
CNMC 015	2020-10-17	3.3	Female	Hispanic	SDB	No				No	x	x	x	x
CNMC 016	2020-10-19	8.9	Female	Hispanic	SDB	No				Yes	x	x	x	x
CNMC 017	2020-10-20	10.5	Female	Hispanic	Mild OSA	No				No	x	x	x	x
CNMC 018	2020-10-21	4.5	Female	White	SDB	Yes		Loratadine		No	x	x	x	x							x	x
CNMC 019	2020-10-21	4.2	Male	Other	Moderate OSA	No				No	x	x	x	x
CNMC 020	2020-10-24	8.2	Male	Black	SDB	Yes				No	x	x	x	x							x	x		x	x	x	x	x	x
CNMC 021	2020-10-24	1.7	Female	Black	SDB	No				No			x	x							x	x		x	x	x	x	x	x
CNMC 022	2020-10-27	4.1	Male	Hispanic	Mild OSA	No				yes			x	x							x	x		x	x	x	x	x	x
CNMC 023	2020-10-28	2.9	Male	Hispanic	SDB	No				No	x	x	x	x							x	x		x	x	x	x	x	x
CNMC 024	2020-10-31	2	Male	Hispanic	SDB	No				No	x	x	x	x							x	x		x	x	x	x	x	x
CNMC 025	2020-11-03	5.2	Female	Other	SDB	Yes				No	x	x	x	x
CNMC 026	2020-11-03	18.6	Female	White	Chronic tonsillitis	Yes				No	x	x	x
CNMC 027	2020-11-05	2.4	Male	Black	Mild OSA	No				No	x	x	x	x		x				x	x	x		x			x
CNMC 028	2020-11-07	4.3	Female	Hispanic	SDB	No			Asthma	No	x	x	x	x						x	x	x	x	x	x	x	x	x	x	x	x	x
CNMC 029	2020-11-07	3.1	Male	Black	SDB	No				Yes	x	x	x	x	x		x		x		x	x	x	x	x	x	x	x	x	x	x	x
CNMC 030	2020-11-07	11	Male	Black	SDB	Yes	Inhaled Steroid		Asthma	No	x	x	x	x
CNMC 031	2020-11-07	11.2	Female	White	SDB	No				No	x	x	x	x		x		x		x	x	x	x	x	x	x	x	x	x	x	x	x
CNMC 032	2020-11-07	3.6	Female	Hispanic	Severe OSA	No				Yes	x	x	x	x	x		x		x		x	x	x	x	x	x	x	x	x	x	x	x
CNMC 033	2020-11-10	7.9	Female	White	SDB	Yes	Inhaled Steroid		Asthma	No	x	x	x	x
CNMC 034	2020-11-10	13.8	Male	Hispanic	SDB	Yes				No	x	x	x	x		x		x		x	x	x	x	x	x	x	x	x	x	x	x	x
CNMC 035	2020-11-14	18	Female	Hispanic	Severe OSA	No				No	x	x	x	x							x		x	x	x	x				x	x	x
CNMC 036	2020-11-14	12	Male	Black	SDB	Yes				No	x	x	x	x							x	x	x	x	x	x	x	x	x	x	x	x
CNMC 037	2020-11-14	9.2	Male	Other	Severe OSA	No				No	x	x	x	x
CNMC 038	2020-11-18	6	Female	Black	PFAPA	Yes			Asthma	No	x	x	x	x
CNMC 039	2020-11-18	16.1	Male	Black	Severe OSA	Yes				No	x	x	x	x		x		x		x	x		x	x	x	x						x
CNMC 040	2020-11-18	2.5	Male	White	PFAPA	Yes	Oral steroid			No	x	x	x	x
CNMC 041	2020-11-18	6	Female	Hispanic	Severe OSA	No				Yes	x	x	x	x	x		x		x		x	x	x	x	x	x	x	x	x			x
CNMC 042	2020-11-18	7.6	Female	Black	Moderate OSA	No				No	x	x	x	x		x		x		x	x	x	x	x	x	x	x	x	x			x
CNMC 043	2020-11-19	5.3	Male	Hispanic	SDB	No				No	x	x	x	x
CNMC 044	2020-11-20	4.6	Male	White	Mild OSA	No		Loratadine		No	x	x	x	x		x		x		x	x	x	x	x	x	x	x	x	x	x	x	x
CNMC 045	2020-11-20	4.3	Female	Other	SDB	No				No	x	x	x	x						x	x	x	x	x	x	x	x	x	x	x	x	x
CNMC 046	2020-11-20	7.2	Male	Other	SDB	No				Yes	x	x	x	x	x		x		x		x	x	x	x	x	x	x	x	x	x	x	x
CNMC 047	2020-11-21	3.5	Female	White	SDB	No				No	x	x	x	x		x		x		x
CNMC 048	2020-11-21	10.9	Male	Other	SDB	No				No	x	x	x	x		x		x		x	x	x	x	x	x	x	x	x	x	x	x	x
CNMC 049	2020-11-21	2.7	Male	Other	SDB	No				No	x	x	x	x		x		x		x	x	x	x	x	x	x	x	x	x	x	x	x
CNMC 050	2020-11-20	2.9	Female	Hispanic	SDB	Yes	Inahled Steroid			Yes	x	x	x	x	x		x		x		x	x	x	x	x	x	x	x	x	x	x	x
CNMC 051	2020-11-24	5.7	Male	Hispanic	Moderate OSA	No				No	x	x	x	x		x		x		x	x	x	x	x	x	x	x	x	x	x	x	x
CNMC 052	2020-11-24	14.1	Male	Hispanic	Severe OSA	No				No	x	x	x	x		x		x		x	x		x	x	x	x				x	x	x
CNMC 053	2020-11-25	9.1	Male	White	SDB	No	Inhaled Steroid	Loratadine	Asthma	No	x	x	x
CNMC 054	2020-12-01	2.3	Female	White	SDB	No				No	x	x	x	x		x		x		x	x	x	x	x	x	x	x	x	x	x	x	x
CNMC 055	2020-12-01	10.7	Male	Black	Severe OSA	No				No	x	x	x	x		x		x		x	x	x	x	x	x	x	x	x	x	x	x	x
CNMC 056	2020-12-01	2.6	Female	Hispanic	SDB	No				No	x	x	x	x		x		x		x	x	x	x	x	x	x	x	x	x	x	x	x
CNMC 057	2020-12-01	3.2	Male	Black	Mild OSA	No				No	x	x	x	x		x		x		x	x	x	x	x	x	x	x	x	x	x	x	x
CNMC 058	2020-12-04	2.2	Female	Black	SDB	No				No	x	x	x	x
CNMC 059	2020-12-04	3.5	Male	White	Moderate OSA	No				No	x	x	x	x							x	x	x	x	x	x	x	x
CNMC 060	2020-12-04	7.3	Female	White	Severe OSA	Yes			Asthma	No	x	x	x	x
CNMC 061	2020-12-04	9.3	Male	White	SDB	No	Inhaled Steroid			No	x	x	x
CNMC 062	2020-12-04	17	Female	White	SDB	Yes				No	x	x	x								x		x	x	x	x
CNMC 063	2020-12-05	6.9	Male	Black	SDB	Yes	Inhaled Steroid	Loratadine		No	x	x	x	x						x	x	x	x	x	x	x	x	x	x	x	x	x
CNMC 064	2020-12-05	3	Female	Other	Severe OSA	No				No	x	x	x	x						x	x	x	x	x	x	x	x	x	x	x	x	x
CNMC 065	2020-12-05	4.5	Male	White	SDB	No				No	x	x	x	x						x	x	x	x	x	x	x	x	x	x	x	x	x
CNMC 066	2020-12-05	3.4	Female	White	PFAPA	Yes	Oral steroid			No	x	x	x	x
CNMC 067	2020-12-05	16.4	Male	White	Recurrent tonsillitis	Yes				No	x	x	x	x
CNMC 068	2020-12-05	6.2	Female	Black	Chronic tonsillitis	Yes				No	x	x	x	x
CNMC 069	2020-12-09	3.4	Female	Hispanic	SDB	Yes	Inahled Steroid			Yes	x	x	x	x	x		x		x		x	x	x	x	x	x	x	x	x	x	x	x
CNMC 070	2020-12-09	16.4	Male	Hispanic	Mild OSA	No				Yes	x	x	x		x				x		x		x	x	x	x				x	x	x
CNMC 071	2020-12-11	6.2	Female	Hispanic	SDB	Yes				Yes	x	x	x	x	x		x		x		x	x	x	x	x	x	x	x	x	x	x	x
CNMC 072	2020-12-11	7.7	Female	Hispanic	SDB	No				No	x	x	x	x		x		x		x	x	x	x	x	x	x	x	x	x	x	x	x
CNMC 073	2020-12-11	5.8	Male	Black	Severe OSA	No	Inhaled Steroid		Asthma	No	x	x	x	x		x		x		x	x	x	x	x	x	x	x	x	x	x	x	x
CNMC 074	2020-12-11	14.6	Male	Black	Severe OSA	No			Asthma	No	x	x	x			x				x	x		x	x	x	x				x	x	x
CNMC 075	2020-12-11	15.3	Female	Hispanic	Chronic tonsillitis	Yes				No	x	x	x	x
CNMC 076	2020-12-12	21	Male	White	Severe OSA	No		Loratadine		No	x	x	x	x
CNMC 077	2020-12-15	9.6	Female	Hispanic	Moderate OSA	No				No	x	x	x	x							x	x	x	x	x	x	x	x	x	x	x	x
CNMC 078	2020-12-16	3.5	Male	Hispanic	SDB	No				No	x	x	x	x								x	x				x
CNMC 079	2020-12-16	6.9	Female	White	Recurrent tonsillitis	Yes				No	x	x	x	x
CNMC 080	2020-12-16	7.5	Male	Hispanic	SDB	No		Loratadine		No	x	x	x	x									x				x
CNMC 081	2020-12-16	3.4	Female	Other	Severe OSA	No				No	x	x	x	x		x		x		x	x	x	x	x	x	x	x	x	x	x	x	x
CNMC 082	2020-12-22	6.9	Male	Hispanic	SDB	Yes			Asthma	No	x	x	x	x		x		x		x	x	x	x	x	x	x	x	x	x	x	x	x
CNMC 083	2020-12-23	3.7	Female	Black	SDB	No				No	x	x	x	x		x		x		x	x	x	x	x	x	x	x	x	x	x	x	x
CNMC 084	2020-12-24	3.2	Male	Black	SDB	No				No	x	x	x	x		x		x		x	x	x	x	x	x	x	x	x	x	x	x	x
CNMC 085	2021-01-05	5.1	Female	Black	Mild OSA	No				No	x	x	x	x		x		x		x	x	x	x	x	x	x	x	x	x	x	x	x
CNMC 086	2021-01-05	5.3	Female	Black	SDB	No				No	x	x	x	x		x		x		x	x	x		x	x	x	x	x	x
CNMC 087	2021-01-06	6	Male	Hispanic	SDB	Yes		Loratadine		Yes	x	x	x	x	x		x		x		x	x	x	x	x	x	x	x	x	x	x	x
CNMC 088	2021-01-08	2.2	Male	Hispanic	PFAPA	Yes	Oral steroid			No			x	x
CNMC 089	2021-01-08	12.1	Female	Hispanic	SDB	No				Yes	x	x	x	x	x		x		x		x	x	x	x	x	x	x	x	x	x	x	x
CNMC 090	2021-01-12	3.1	Male	Hispanic	SDB	Yes				No	x	x	x	x		x		x		x			x				x	x	x	x	x	x
CNMC 091	2021-01-12	9.2	Male	Hispanic	Moderate OSA	No				Yes	x	x	x	x	x		x		x		x	x	x	x	x	x	x	x		x	x	x
CNMC 092	2021-01-13	18	Female	Black	Severe OSA	No	Inhaled Steroid			No	x	x	x	x
CNMC 093	2021-01-13	7.5	Male	White	Recurrent tonsillitis	Yes	Oral steroid			No	x	x	x	x
CNMC 094	2021-01-15	3	Male	White	SDB	No				No	x	x	x	x		x		x			x	x	x	x	x	x	x	x	x	x	x	x
CNMC 095	2021-01-15	3.3	Male	Black	SDB	No				No	x	x	x	x		x					x	x	x	x	x	x	x	x	x	x	x	x
CNMC 096	2021-01-20	11.9	Male	Hispanic	SDB	No				No	x	x	x								x		x	x	x	x				x	x	x
CNMC 097	2021-01-20	6	Female	Black	SDB	No				No	x	x	x	x							x	x	x	x	x	x	x	x		x	x	x
CNMC 098	2021-01-23	2.8	Female	HIspanic	SDB	No				No	x	x	x	x		x		x		x	x	x	x	x	x	x				x	x	x
CNMC 099	2021-01-23	7.1	Male	White	Mild OSA	No				No	x	x	x	x		x		x		x	x		x	x	x	x				x	x	x
CNMC 100	2021-01-26	4.7	Female	Other	Mild OSA	No	Inhaled Steroid			Yes	x	x	x		x				x		x	x	x	x	x	x				x	x	x
CNMC 101	2021-01-26	4.6	Male	Hispanic	SDB	Yes				Yes	x	x	x	x	x		x		x		x	x	x	x	x	x	x	x	x	x	x	x
CNMC 102	2021-02-11	5.1	Male	Hispanic	SDB	No				Yes	x	x	x	x	x		x		x		x	x	x	x	x	x				x	x	x
CNMC 103	2021-05-13	8.1	Male	Hispanic	Mild OSA	No				Yes	x	x	x	x	x		x		x
CNMC 104	2021-05-19	6.8	Male	Hispanic	SDB	Yes	Inhaled Steroid			Yes	x	x	x	x	x		x		x
CNMC 105	2021-05-19	14.1	Male	Other	Chronic tonsillitis	Yes			Asthma	No	x	x	x
CNMC 106	2021-05-21	2.5	Male	White	PFAPA	Yes	Oral steroid	Loratadine		No			x	x
CNMC 107	2021-06-05	7.2	Male	Asian	PFAPA	Yes	Oral steroid			No	x	x	x	x
CNMC 108	2021-06-22	4.2	Female	Other	ETD	No				Yes	x	x		x			x		x			x	x
CNMC 109	2021-06-22	5.1	Male	Hispanic	SDB	No				Yes	x	x		x			x		x			x	x
CNMC 110	2021-06-22	7	Female	Black	SDB	No			Asthma	No	x	x	x	x		x		x		x		x	x
