# Supplementary material for: Robust, persistent adaptive immune responses to SARS-CoV-2 in the oropharyngeal lymphoid tissue of children
Source: Res Sq. 2022 Mar 23:rs.3.rs-1276578. Preprint. [Version 1] doi: 10.21203/rs.3.rs-1276578/v1 (PMC8963700; doi:10.21203/rs.3.rs-1276578/v1)
Supplement: Supplement 6 [file 3b8ed9c7c24679bf3e5b39cf.xlsx]

## Sheet: Summary of Serologic Testing
Sample ID	Serologic Testing				Flow Cytometry Analysis
	IgG to S and RBD	IgM to S and RBD	IgA to S and RBD	Neutralization antibodies to WA-1	S1+RBD+ B cells in PBMC	S1+RBD+ B cells in tonsil and/or adenoid
CNMC 001	+	-	-	+	NA	NA
CNMC 002	-	-	-	NA	NA	NA
CNMC 003	-	-	-	NA	NA	NA
CNMC 004	-	-	-	NA	NA	NA
CNMC 005	+	+	-	+	+	+
CNMC 006	-	-	-	NA	NA	NA
CNMC 007	-	-	-	NA	NA	NA
CNMC 008	+	-	+	+	+	+
CNMC 009	-	-	-	-	NA	NA
CNMC 010	-	-	-	-	NA	NA
CNMC 011	+	-	+	+	+	+
CNMC 012	-	-	-	NA	NA	NA
CNMC 013	-	-	-	NA	NA	NA
CNMC 014	-	-	-	NA	NA	NA
CNMC 015	-	-	-	NA	NA	NA
CNMC 016	+	+	+	+	+	+
CNMC 017	-	-	-	-	NA	NA
CNMC 018	-	-	-	NA	NA	NA
CNMC 019	-	-	-	NA	NA	NA
CNMC 020	-	-	-	NA	NA	NA
CNMC 021	No blood	No blood	No blood	No blood	No blood	-
CNMC 022	No blood	No blood	No blood	No blood	No blood	+
CNMC 023	-	-	-	NA	-	-
CNMC 024	-	-	-	NA	-	-
CNMC 025	-	-	-	NA	-	-
CNMC 026	-	-	-	NA	-	-
CNMC 027	-	-	-	NA	-	-
CNMC 028	-	-	-	NA	-	-
CNMC 029	+	-	+	+	+	+
CNMC 030	-	-	-	NA	-	-
CNMC 031	-	-	-	NA	-	-
CNMC 032	+	-	+	+	+	+
CNMC 033	-	-	-	NA	-	-
CNMC 034	-	-	-	NA	-	-
CNMC 035	-	-	-	NA	-	-
CNMC 036	-	-	-	NA	-	-
CNMC 037	-	-	-	NA	-	-
CNMC 038	-	-	+	-	-	-
CNMC 039	-	-	-	NA	-	-
CNMC 040	-	-	-	NA	-	-
CNMC 041	+	-	+	+	+	+
CNMC 042	-	-	-	-	-	-
CNMC 043	-	-	-	-	-	-
CNMC 044	-	-	-	NA	-	-
CNMC 045	-	-	-	NA	-	-
CNMC 046	+	-	+	+	+	+
CNMC 047	-	-	-	NA	-	-
CNMC 048	-	-	-	NA	-	-
CNMC 049	-	-	-	NA	-	-
CNMC 050	+	+	-	+	+	+
CNMC 051	-	-	-	NA	-	-
CNMC 052	-	-	-	NA	-	-
CNMC 053	-	-	-	NA	-	-
CNMC 054	-	-	-	-	-	-
CNMC 055	-	-	-	NA	-	-
CNMC 056	-	-	-	NA	-	-
CNMC 057	-	-	-	NA	-	-
CNMC 058	Indeterminate	-	+	-	-	-
CNMC 059	-	-	-	NA	-	-
CNMC 060	-	-	-	NA	-	-
CNMC 061	-	-	-	NA	-	-
CNMC 062	-	-	-	NA	-	-
CNMC 063	-	-	-	NA	-	-
CNMC 064	-	-	-	NA	-	-
CNMC 065	-	-	-	NA	-	-
CNMC 066	-	-	-	NA	-	-
CNMC 067	-	-	-	NA	-	-
CNMC 068	-	-	-	NA	-	-
CNMC 069	+	-	+	+	+	+
CNMC 070	+	-	+	+	+	+
CNMC 071	+	-	+	+	+	+
CNMC 072	-	-	-	-	-	-
CNMC 073	-	-	-	NA	-	-
CNMC 074	-	-	-	NA	-	-
CNMC 075	-	-	-	NA	-	-
CNMC 076	Indeterminate	-	-	-	-	-
CNMC 077	-	-	-	NA	-	-
CNMC 078	-	-	-	NA	-	-
CNMC 079	-	-	-	-	-	-
CNMC 080	-	-	-	NA	-	-
CNMC 081	-	-	-	NA	-	-
CNMC 082	-	-	-	NA	-	-
CNMC 083	-	-	-	NA	-	-
CNMC 084	-	-	-	-	-	-
CNMC 085	-	-	-	NA	-	-
CNMC 086	-	-	-	NA	-	-
CNMC 087	+	+	+	+	+	+
CNMC 088	No blood	No blood	No blood	No blood	No blood	-
CNMC 089	+	+	-	+	+	+
CNMC 090	-	-	-	NA	-	-
CNMC 091	Indeterminate	+	-	+	very few	+
CNMC 092	-	-	-	NA	-	-
CNMC 093	-	-	-	NA	-	-
CNMC 094	-	-	-	-	-	-
CNMC 095	-	-	-	NA	-	-
CNMC 096	-	-	-	NA	-	-
CNMC 097	-	-	-	NA	-	-
CNMC 098	-	-	-	NA	-	-
CNMC 099	-	-	-	NA	-	-
CNMC 100	+	-	-	+	+	+
CNMC 101	+	-	+	+	+	+
CNMC 102	+	+	+	+	+	+
CNMC 103	NA	NA	NA	+	+	+
CNMC 104	NA	NA	NA	+	very few	+
CNMC 105	NA	NA	NA	NA	-	-
CNMC 106	NA	NA	NA	NA	-	-
CNMC 107	NA	NA	NA	NA	-	-
CNMC 108	NA	NA	NA	+	+	+
CNMC 109	NA	NA	NA	+	+	+
CNMC 110	NA	NA	NA	-	NA	-

## Sheet: Neutralization Titers
Supplementary Table 4: Serologic Test Summary and Data
		PsVNA50
No.	Sample ID	WA‐1	B.1.429 (Epsilon)	B.1.1.7 (Alpha)	P.1 (Gamma)	B.1.351 (Beta)	B.1.526 (Iota)	B.1.617.2 (Delta)	B.1.1.529 (Omicron)	COVID status by serum ELISA or SARS-CoV-2 specific B cells by flow cytrometry
1	CNMC 001_serum	144.6	46.8	49.4	44.6	34.8	62.6	44.5	10	+
2	CNMC 005_serum	355.6	74	76.4	69.4	61.2	84.2	69.6	10	+
3	CNMC 008_serum	403.4	155	203.1	102.4	125.7	180.7	121.3	118.3	+
4	CNMC 011_serum	628	72.3	99.8	47.9	65.8	67.5	69.6	10	+
5	CNMC 016_serum	1781.7	358.8	485	245.4	215.1	361.5	351.3	45.7	+
6	CNMC 029_serum	557	192.8	316.3	139.3	142.1	108.7	151.3	10	+
7	CNMC 032_serum	1247.7	345	381.7	214	74.2	294.3	202.1	24.5	+
8	CNMC 041_serum	460.1	256.6	363	179.9	169.2	350.2	279.9	83.9	+
9	CNMC 046_serum	588.1	331.7	340.4	175.1	170	224.8	240.2	31.4	+
10	CNMC 050_serum	736.9	298.7	687.8	322	219	213	212.1	10	+
11	CNMC 069_serum	383	169.4	300.9	98.6	97	119.4	96.1	10	+
12	CNMC 070_serum	754.9	310.3	280.8	82	22.3	47.6	102.5	10	+
13	CNMC 071_serum	878.8	285	698.7	265	252.8	390.61	360.2	208.8	+
14	CNMC 087_serum	775.8	378.5	509.5	272.9	219.1	327.5	298.4	32.7	+
15	CNMC 089_serum	401.4	114.8	167.4	88.7	94.9	101.4	80.6	10	+
16	CNMC 091_serum	72.1	30.2	23.4	29.5	10	10	10	10	+
17	CNMC 100_serum	1089.4	282.4	317.4	67.1	69.8	174.3	124.4	10	+
18	CNMC 101_serum	326.2	243.6	247.4	195.3	126.6	181.3	166.8	52.3	+
19	CNMC 102_serum	1002.5	299.5	394.8	128.2	106.7	171.8	132.4	10	+
20	CNMC 103_serum	455.9	327.5	440.7	174.5	133.8	214.1	182.4	34.9	+
21	CNMC 104_serum	67.5	31.3	30.4	10	10	10	10	10	+
22	CNMC 108_serum	186.9	143.5	144.1	89.9	53.7	107.8	82	10	+
23	CNMC 109_serum	170.6	83.5	138	31.7	36.4	33.1	59.4	10	+
24	CNCM 009_serum	10	10	10	10	10	10	10	10	-
25	CNMC 010_serum	10	10	10	10	10	10	10	10	-
26	CNMC 017_serum	10	10	10	10	10	10	10	10	-
27	CNMC 038_serum	10	10	10	10	10	10	10	10	-
28	CNMC 042_serum	10	10	10	10	10	10	10	10	-
29	CNMC 043_serum	10	10	10	10	10	10	10	10	-
30	CNMC 054_serum	10	10	10	10	10	10	10	10	-
31	CNMC 058_serum	10	10	10	10	10	10	10	10	-
32	CNMC 072_serum	10	10	10	10	10	10	10	10	-
33	CNMC 076_serum	10	10	10	10	10	10	10	10	-
34	CNMC 079_serum	10	10	10	10	10	10	10	10	-
35	CNMC 084_serum	10	10	10	10	10	10	10	10	-
36	CNMC 094_serum	10	10	10	10	10	10	10	10	-
37	CNMC 110_serum	10	10	10	10	10	10	10	10	-

## Sheet: OD of ELISA for serology
Threshold	0.674721	0.306268	0.20813	0.270554	0.116763	0.147716
Sample ID	IgG		IgM		IgA			IgG	IgM	IgA
	Spike	RBD	Spike	RBD	Spike	RBD
CNMC 001	3.2475	2.1925	0.086	0.0705	0.1735	0.093		+	-	-
CNMC 002	0.0855	0.063	0.0335	0.04	0.0115	0.0115		-	-	-
CNMC 003	0.1605	0.0235	0.0335	0.0365	0.0135	0.008		-	-	-
CNMC 004	0.071	0.0525	0.0405	0.03	0.0115	0.0115		-	-	-
CNMC 005	3.6325	3.03	2.1785	1.6765	0.2475	0.1155		+	+	-
CNMC 006	0.054	0.0415	0.0435	0.045	0.011	0.01		-	-	-
CNMC 007	0.048	0.0365	0.033	0.042	0.013	0.014		-	-	-
CNMC 008	3.802	3.51	0.0955	0.09	0.93	0.4735		+	-	+
CNMC 009	0.0525	0.029	0.0385	0.031	0.01	0.0085		-	-	-
CNMC 010	0.142	0.1165	0.089	0.09	0.035	0.0125		-	-	-
CNMC 011	3.438	2.381	0.049	0.049	0.379	0.179		+	-	+
CNMC 012	0.1005	0.038	0.068	0.0415	0.016	0.0195		-	-	-
CNMC 013	0.0915	0.0925	0.048	0.0445	0.0235	0.012		-	-	-
CNMC 014	0.131	0.0865	0.076	0.1705	0.02	0.0165		-	-	-
CNMC 015	0.0985	0.1335	0.053	0.0835	0.0095	0.0105		-	-	-
CNMC 016	3.9005	3.709	0.3175	0.3285	0.6155	0.2185		+	+	+
CNMC 017	0.9365	0.059	0.0555	0.045	0.0245	0.0115		-	-	-
CNMC 018	0.068	0.0325	0.047	0.0465	0.01	0.0085		-	-	-
CNMC 019	0.0985	0.026	0.0555	0.0675	0.0165	0.008		-	-	-
CNMC 020	0.1015	0.0585	0.091	0.098	0.024	0.0155		-	-	-
CNMC 021	No blood							No blood
CNMC 022	No blood							No blood
CNMC 023	0.009	0.006	0.0075	0.01	0.013	0.007		-	-	-
CNMC 024	0.0545	0.0365	0.0335	0.033	0.013	0.0125		-	-	-
CNMC 025	0.072	0.047	0.057	0.0445	0.014	0.0095		-	-	-
CNMC 026	0.0605	0.0355	0.0345	0.0475	0.011	0.0095		-	-	-
CNMC 027	0.09	0.048	0.0865	0.11	0.013	0.0125		-	-	-
CNMC 028	0.211	0.1465	0.09	0.0455	0.0515	0.019		-	-	-
CNMC 029	3.6825	3.1505	0.0905	0.05	0.501	0.29		+	-	+
CNMC 030	0.0545	0.033	0.0245	0.023	0.02	0.015		-	-	-
CNMC 031	0.2365	0.1225	0.151	0.203	0.032	0.018		-	-	-
CNMC 032	3.951	3.896	0.2135	0.2345	1.4905	1.022		+	-	+
CNMC 033	0.3755	0.7585	0.1135	0.0515	0.0175	0.0145		-	-	-
CNMC 034	0.0725	0.0735	0.026	0.0285	0.0145	0.0105		-	-	-
CNMC 035	0.3795	0.1875	0.11	0.1335	0.049	0.061		-	-	-
CNMC 036	0.185	0.1655	0.1035	0.1695	0.047	0.05		-	-	-
CNMC 037	0.69	0.202	0.1885	0.272	0.048	0.055		-	-	-
CNMC 038	0.4555	0.4	0.083	0.0995	0.266	0.2925		-	-	+
CNMC 039	0.1745	0.1775	0.096	0.115	0.0485	0.0535		-	-	-
CNMC 040	0.307	0.3115	0.0435	0.092	0.0285	0.036		-	-	-
CNMC 041	3.7255	3.395	0.203	0.2665	0.371	0.2275		+	-	+
CNMC 042	0.271	0.161	0.0895	0.0935	0.0435	0.0455		-	-	-
CNMC 043	0.113	0.122	0.0685	0.0765	0.0365	0.041		-	-	-
CNMC 044	0.1895	0.1625	0.082	0.1065	0.041	0.045		-	-	-
CNMC 045	0.1275	0.1795	0.0895	0.1015	0.0435	0.0455		-	-	-
CNMC 046	3.6445	3.3185	0.105	0.12	0.2875	0.1965		+	-	+
CNMC 047	0.1705	0.1375	0.1445	0.196	0.0495	0.054		-	-	-
CNMC 048	0.161	0.279	0.059	0.3375	0.0505	0.0805		-	-	-
CNMC 049	0.2015	0.233	0.0875	0.109	0.0495	0.0525		-	-	-
CNMC 050	3.693	3.3035	0.258	0.375	0.1595	0.145		+	+	-
CNMC 051	0.6245	0.1445	0.0815	0.0925	0.045	0.0565		-	-	-
CNMC 052	0.1735	0.18	0.162	0.1265	0.043	0.0465		-	-	-
CNMC 053	0.149	0.2105	0.1435	0.188	0.043	0.048		-	-	-
CNMC 054	0.0955	0.0825	0.262	0.1	0.0415	0.044		-	-	-
CNMC 055	0.137	0.115	0.094	0.11	0.042	0.048		-	-	-
CNMC 056	0.193	0.2445	0.125	0.134	0.023	0.026		-	-	-
CNMC 057	0.1525	0.1805	0.076	0.112	0.041	0.0435		-	-	-
CNMC 058	0.747	0.5905	0.133	0.1215	0.1425	0.159		Indeterminate	-	+
CNMC 059	0.1045	0.243	0.089	0.239	0.0385	0.044		-	-	-
CNMC 060	0.4595	0.187	0.1125	0.1415	0.052	0.047		-	-	-
CNMC 061	0.0965	0.1085	0.091	0.111	0.0375	0.042		-	-	-
CNMC 062	0.1795	0.1755	0.1235	0.163	0.0585	0.065		-	-	-
CNMC 063	0.1455	0.1895	0.151	0.189	0.043	0.05		-	-	-
CNMC 064	0.2445	0.156	0.063	0.0815	0.0205	0.0225		-	-	-
CNMC 065	0.081	0.1455	0.0625	0.08	0.039	0.0425		-	-	-
CNMC 066	0.1695	0.1945	0.102	0.1205	0.038	0.044		-	-	-
CNMC 067	0.1125	0.17	0.0785	0.092	0.0445	0.048		-	-	-
CNMC 068	0.123	0.28	0.109	0.128	0.043	0.0515		-	-	-
CNMC 069	3.5585	3.132	0.0995	0.1355	0.2015	0.188		+	-	+
CNMC 070	3.6915	3.6615	0.1965	0.289	0.2355	0.3005		+	-	+
CNMC 071	3.8585	3.6205	0.276	0.214	0.661	0.49		+	-	+
CNMC 072	0.1475	0.146	0.066	0.075	0.0235	0.0295		-	-	-
CNMC 073	0.1445	0.1335	0.09	0.1155	0.042	0.0505		-	-	-
CNMC 074	0.1415	0.1955	0.103	0.1665	0.0445	0.0525		-	-	-
CNMC 075	0.1665	0.1875	0.1865	0.1795	0.0495	0.058		-	-	-
CNMC 076	0.726	0.583	0.091	0.2875	0.088	0.1385		Indeterminate	-	-
CNMC 077	0.124	0.1235	0.1735	0.1895	0.0465	0.0465		-	-	-
CNMC 078	0.15	0.111	0.1505	0.191	0.0435	0.047		-	-	-
CNMC 079	0.262	0.2795	0.1465	0.137	0.0885	0.047		-	-	-
CNMC 080	0.1645	0.1425	0.177	0.0985	0.0765	0.033		-	-	-
CNMC 081	0.0775	0.0485	0.1205	0.078	0.0595	0.0145		-	-	-
CNMC 082	0.1325	0.214	0.0685	0.06	0.072	0.0125		-	-	-
CNMC 083	0.136	0.196	0.154	0.126	0.086	0.0325		-	-	-
CNMC 084	0.33	0.33	0.117	0.102	0.0695	0.0195		-	-	-
CNMC 085	0.193	0.1705	0.062	0.061	0.0605	0.015		-	-	-
CNMC 086	0.157	0.1825	0.155	0.136	0.067	0.0245		-	-	-
CNMC 087	3.2865	3.1465	0.2705	0.2805	0.5255	0.292		+	+	+
CNMC 088	No blood							No blood
CNMC 089	3.3325	3.1135	0.366	0.365	0.2915	0.1475		+	+	-
CNMC 090	0.2985	0.1185	0.0775	0.068	0.0615	0.0115		-	-	-
CNMC 091	0.728	0.651	0.4025	0.535	0.175	0.065		Indeterminate	+	-
CNMC 092	0.2295	0.2385	0.164	0.0865	0.115	0.0595		-	-	-
CNMC 093	0.1775	0.106	0.208	0.085	0.056	0.0075		-	-	-
CNMC 094	0.083	0.0775	0.0625	0.0795	0.0535	0.0105		-	-	-
CNMC 095	0.0595	0.0645	0.056	0.0595	0.0505	0.0065		-	-	-
CNMC 096	0.3055	0.2425	0.088	0.11	0.0715	0.035		-	-	-
CNMC 097	0.134	0.106	0.1735	0.1355	0.063	0.0125		-	-	-
CNMC 098	0.147	0.181	0.0985	0.0955	0.08	0.0165		-	-	-
CNMC 099	0.0945	0.0905	0.099	0.096	0.0645	0.016		-	-	-
CNMC 100	3.323	3.1365	0.2475	0.2445	0.21	0.133		+	-	-
CNMC 101	3.2405	2.839	0.166	0.1755	0.421	0.208		+	-	+
CNMC 102	3.3325	3.2245	0.2685	0.277	1.5005	1.6		+	+	+
