# Supplementary material for: Robust, persistent adaptive immune responses to SARS-CoV-2 in the oropharyngeal lymphoid tissue of children
Source: Res Sq. 2022 Mar 23:rs.3.rs-1276578. Preprint. [Version 1] doi: 10.21203/rs.3.rs-1276578/v1 (PMC8963700; doi:10.21203/rs.3.rs-1276578/v1)
Supplement: Supplement 8 [file 4818ccd34861f198bd6e0cab.xlsx]

## Sheet: Sheet1
	COVID-19 convalescent adenoids				COVID-19 convalescent tonsils
Number	Tissue	Sample type	N1 Copies/ng RNA	N2 Copies/ng RNA	Tissue	Sample type	N1 Copies/ng RNA	N2 Copies/ng RNA
1	CNMC 001 - Adenoid	FFPE	0.134409	0.237001	CNMC 001 - Tonsil	FFPE	0.00346372	0.00475019
2	CNMC 005 - Adenoid	FFPE	2.87027	3.14958	CNMC 005 - Tonsil	FFPE	0.150967	0.158923
3	CNMC 008 - Adenoid	FFPE	0.000440211	0	CNMC 008 - Tonsil	FFPE	0.0136493	0.0165866
4	CNMC 011 - Adenoid	FFPE	0.303092	0.257145	CNMC 011 - Tonsil	FFPE	3.3118	4.59992
5	CNMC 022 - Adenoid	FFPE	0.00693973	0.00843334	CNMC 016 - Tonsil	FFPE	0.234283	0.2916
6	CNMC 103 - Adenoid	FFPE	0.0258749	0.037583	CNMC 022 - Tonsil	FFPE	0.0192658	0.0221444
7	CNMC 104 - Adenoid	FFPE	0.00632993	0.0113271	CNMC 029 - Tonsil	FFPE	0.0033006	0.00496897
8	CNMC 108 - Adenoid	FFPE	0.0447808	0.0537787	CNMC 032 - Tonsil	FFPE	0	0
9	CNMC 109 - Adenoid	FFPE	0.000942881	0.00107286	CNMC 041 - Tonsil	FFPE	0.0725942	0.0621186
10					CNMC 046 - Tonsil	FFPE	0.0210672	0.0335815
11					CNMC 050 - Tonsil	FFPE	0	0.00159606
12					CNMC 069 - Tonsil	FFPE	0.000834595	0.0001
13					CNMC 070 - Tonsil	FFPE	0.0180935	0.0220412
14					CNMC 071 - Tonsil	FFPE	0.00137611	0.0041287
15					CNMC 087 - Tonsil	FFPE	0.0436757	0.0339487
16					CNMC 089 - Tonsil	FFPE	0.0115374	0.00898229
17					CNMC 091 - Tonsil	FFPE	0.0394008	0.0295443
18					CNMC 100 - Tonsil	FFPE	0.0299582	0.0512692
19					CNMC 101 - Tonsil	FFPE	0.0022214	0
20					CNMC 102 - Tonsil	FFPE	0.000475565	0
21					CNMC 103 - Tonsil	FFPE	0.00504789	0.0180382
					CNMC 104 - Tonsil	FFPE	0	0
	CONTROL adenoids				CONTROL tonsils
Number	Tissue	Sample type	N1 Copies/ng RNA	N2 Copies/ng RNA	Tissue	Sample type	N1 Copies/ng RNA	N2 Copies/ng RNA
1	CNMC 003 - Adenoid	FFPE	0.00212438	0.00110908	CNMC 014 - Tonsil	FFPE	0	0
2	CNMC 006 - Adenoid	FFPE	0.000984502	0	CNMC 017 - Tonsil	FFPE	0.000485554	0.000971149
3	CNMC 007 - Adenoid	FFPE	0	0	CNMC 020 - Tonsil	FFPE	0	0
4	CNMC 018 - Adenoid	FFPE	0	0	CNMC 027 - Tonsil	FFPE	0	0.00399887
5	CNMC 107 - Adenoid	FFPE	0	0	CNMC 044 - Tonsil	FFPE	0	0
6	CNMC 110 - Adenoid	FFPE	0	0	CNMC 063 - Tonsil	FFPE	0	0.00133617
7					CNMC 081 - Tonsil	FFPE	0.0010197	0.0010197
8					CNMC 090 - Tonsil	FFPE	0	0
9					CNMC 110 - Tonsil	FFPE	0	0
		N1 positive (>/= 0.1 cp/uL & 2 droplets/well)
		N2 positive (>/= 0.1 cp/uL & 2 droplets/well)
		Under LOD (< 0.1 cp/uL or 2 droplets/well
