# Supplementary material for: Robust, persistent adaptive immune responses to SARS-CoV-2 in the oropharyngeal lymphoid tissue of children
Source: Res Sq. 2022 Mar 23:rs.3.rs-1276578. Preprint. [Version 1] doi: 10.21203/rs.3.rs-1276578/v1 (PMC8963700; doi:10.21203/rs.3.rs-1276578/v1)
Supplement: Supplement 10 [file 771da4ee630e83f2fb9ca121.xlsx]

## Sheet: Imaging
Supplementary Table 9: Samples used in Functional Analyses and Imaging
Participant ID	Date of sample acquired	Age (years)	Diagnosis	Prior COVID-19	Symptomatic at time of positive PCR/Ag test	Time since infection (days)
CNMC 005	2020-09-29	7.5	SDB	+
CNMC 008	2020-10-03	3.4	Mild OSA	+
CNMC 022	2020-10-27	4.1	Mild OSA	+	Symptomatic	108
CNMC 003	2020-09-26	5.3	Mild OSA	-
CNMC 018	2020-10-21	4.5	SDB	-
CNMC 021	2020-10-24	1.7	SDB	-
SDB = sleep disordered breathing
OSA = obstructive sleep apnea
Ag = antigen

## Sheet: T cell cytokine studies
Participant ID	Prior COVID-19	Sample Type			Participant information
		PBMC	Tonsil	Adenoid	Age (years)	Sex	Diagnosis
CNMC 005	+		x	x	7.5	Female	SDB
CNMC 008	+	x	x	x	3.4	Male	Mild OSA
CNMC 011	+	x	x	x	8	Male	Mild OSA
CNMC 022	+		x	x	4.1	Male	Mild OSA
CNMC 029	+	x	x	x	3.1	Male	SDB
CNMC 032	+		x	x	3.6	Female	Severe OSA
CNMC 041	+		x	x	6	Female	Severe OSA
CNMC 046	+		x	x	7.2	Male	SDB
CNMC 050	+		x	x	2.9	Female	SDB
CNMC 071	+		x	x	6.2	Female	SDB
CNMC 087	+		x	x	6	Male	SDB
CNMC 101	+	x	x	x	4.6	Male	SDB
CNMC 102	+		x	x	5.1	Male	SDB
CNMC 007	-	x	x	x	3.1	Male	SDB
CNMC 014	-		x	x	3.5	Male	SDB
CNMC 017	-	x	x	x	10.5	Female	Mild OSA
CNMC 020	-		x	x	8.2	Male	SDB
CNMC 027	-	x	x	x	2.4	Male	Mild OSA
CNMC 044	-		x	x	4.6	Male	Mild OSA
CNMC 060	-		x	x	7.3	Female	Severe OSA
CNMC 063	-		x	x	6.9	Male	SDB
CNMC 081	-		x	x	3.4	Female	Severe OSA
CNMC 082	-		x	x	6.9	Male	SDB
CNMC 090	-	x	x	x	3.1	Male	SDB
CNMC 097	-		x	x	6	Female	SDB
CNMC 110	-		x	x	7	Female	SDB
SDB = sleep disordered breathing
OSA = obstructive sleep apnea

## Sheet: AIM assay
Participant ID	Prior COVID-19	Sample Type			Participant information
		PBMC	Tonsil	Adenoid	Age (years)	Sex	Diagnosis
CNMC 005	x	x	x	x	7.5	Female	SDB
CNMC 008	x	x	x	x	3.4	Male	Mild OSA
CNMC 011	x	x	x	x	8	Male	Mild OSA
CNMC 101	x	x	x	x	4.6	Male	SDB
CNMC 102	x	x	x	x	5.1	Male	SDB
CNMC 103	x	x	x	x	8.1	Male	Mild OSA
CNMC 064		x	x	x	3	Female	Severe OSA
CNMC 065		x	x	x	4.5	Male	SDB
SDB = sleep disordered breathing
OSA = obstructive sleep apnea
