# Supplementary material for: Robust, persistent adaptive immune responses to SARS-CoV-2 in the oropharyngeal lymphoid tissue of children
Source: Res Sq. 2022 Mar 23:rs.3.rs-1276578. Preprint. [Version 1] doi: 10.21203/rs.3.rs-1276578/v1 (PMC8963700; doi:10.21203/rs.3.rs-1276578/v1)
Supplement: Supplement 16 [file c0ab9584b0ed9c85a6cdf905.xlsx]

## Sheet: Shared Clones
Supplementary Table 6: Characteristics of Shared Clones
Cell number	Clone number	Donor	Clone ID	Tissue	S1 binding	CITE-seq cell ID	CITE-seq cluster
1	1	CNMC71	CNMC71-1240	Adenoid	S1+	TTGCGTCAGGTGCTTT-06	2
2		CNMC71	CNMC71-1240	Tonsil	S1+	TAGACCATCTTACCGC-06	2
3	2	CNMC71	CNMC71-1630	Adenoid	S1+	ATCACGAGTGTGTGCC-06	2
4		CNMC71	CNMC71-1630	Tonsil	S1+	GGGTCTGCATGCTGGC-06	2
5		CNMC71	CNMC71-1630	Tonsil	S1+	TGATTTCGTGCAACTT-06	2
6	3	CNMC71	CNMC71-1638	Adenoid	S1+	GAGCAGAGTTACGGAG-06	2
7		CNMC71	CNMC71-1638	Tonsil	S1+	GTGCTTCTCAGAGGTG-06	2
8	4	CNMC71	CNMC71-1766	Adenoid	S1+	AACTCTTGTGGCGAAT-06	2
9		CNMC71	CNMC71-1766	Tonsil	S1+	TAGTGGTAGTGATCGG-06	2
10	5	CNMC71	CNMC71-2355	Adenoid	S1+	CGGACACAGATATGGT-06	9
11		CNMC71	CNMC71-2355	Tonsil	S1+	CCGGGATCATTTCAGG-06	2
12		CNMC71	CNMC71-2355	Tonsil	S1+	GGACATTCATCACGAT-06	2
13	6	CNMC71	CNMC71-2404	Adenoid	S1+	CTGATAGTCATCACCC-06	2
14		CNMC71	CNMC71-2404	Tonsil	S1+	TTTCCTCGTACCCAAT-06	2
15	7	CNMC71	CNMC71-2781	Adenoid	S1+	AGTTGGTCATCCAACA-06	2
16		CNMC71	CNMC71-2781	Tonsil	S1+	GTGTTAGGTAGCGTAG-06	2
17	8	CNMC71	CNMC71-2883	Adenoid	S1+	AGCGGTCCATGGTTGT-06	2
18		CNMC71	CNMC71-2883	Tonsil	S1+	AGAGTGGTCCAGGGCT-06	2
19		CNMC71	CNMC71-2883	Tonsil	S1+	TCTTTCCGTCTGCCAG-06	2
20	9	CNMC71	CNMC71-988	Adenoid	S1+	CCTCTGAAGTACGATA-06	2
21		CNMC71	CNMC71-988	Tonsil	S1+	CGATGTAAGTAAGTAC-06	2
22		CNMC71	CNMC71-988	Tonsil	S1+	TGCCCTAGTTTGCATG-06	2
23	10	CNMC89	CNMC89-1482	Adenoid	S1+	AGGTCATTCTGCAGTA-06	2
24		CNMC89	CNMC89-1482	Tonsil	S1+	CATGGCGAGCGCCTCA-06	2
25	11	CNMC89	CNMC89-1602	Adenoid	S1+	CTCAGAAAGCTGAACG-06	2
26		CNMC89	CNMC89-1602	Tonsil	S1+	ACCAGTAGTTCCACAA-06	4
27	12	CNMC89	CNMC89-1930	Adenoid	S1+	GTTACAGCAGATCTGT-06	2
28		CNMC89	CNMC89-1930	Tonsil	S1+	TGCCAAAAGCTGAACG-06	2
29	13	CNMC89	CNMC89-2894	Adenoid	S1+	GACTACAGTGCAACGA-06	2
30		CNMC89	CNMC89-2894	Tonsil	S1+	ACACCGGAGGGATGGG-06	2
31	14	CNMC89	CNMC89-2948	Adenoid	S1+	TTCTCCTTCGTACGGC-06	2
32		CNMC89	CNMC89-2948	Tonsil	S1+	GATCGATCATAGAAAC-06	2
33	15	CNMC89	CNMC89-2953	Adenoid	S1+	CAACCTCGTCTCAACA-06	2
34		CNMC89	CNMC89-2953	Adenoid	S1+	GGGCACTGTTCACGGC-06	2
35		CNMC89	CNMC89-2953	Adenoid	S1+	TTGCCGTGTGCACTTA-06	2
36		CNMC89	CNMC89-2953	Tonsil	S1+	CAGCAGCAGTCCGTAT-06	2
37		CNMC89	CNMC89-2953	Tonsil	S1+	CATTATCCAAGAGTCG-06	2
38		CNMC89	CNMC89-2953	Tonsil	S1+	CCGTGGATCTCTTGAT-06	2
39		CNMC89	CNMC89-2953	Tonsil	S1+	GGAATAAAGATGTCGG-06	3
40		CNMC89	CNMC89-2953	Tonsil	S1+	TAGCCGGGTTTGACTG-06	2
41		CNMC89	CNMC89-2953	Tonsil	S1+	TCGAGGCTCTAGCACA-06	2
42	16	CNMC89	CNMC89-3456	Adenoid	S1+	ACGCAGCCAGTATAAG-06	2
43		CNMC89	CNMC89-3456	Adenoid	S1+	CGGAGTCTCCGTAGTA-06	11
44		CNMC89	CNMC89-3456	Adenoid	S1+	GCTCTGTGTACTTCTT-06	2
45		CNMC89	CNMC89-3456	Adenoid	S1+	TCCACACCAAGCCATT-06	2
46		CNMC89	CNMC89-3456	Adenoid	S1+	TGAGCCGTCCAATGGT-06	2
47		CNMC89	CNMC89-3456	Tonsil	S1+	CTACATTGTTGGTTTG-06	4
48		CNMC89	CNMC89-3456	Tonsil	S1+	CTCAGAAAGGTGTTAA-06	2
49		CNMC89	CNMC89-3456	Tonsil	S1+	GGGTCTGAGTGTGAAT-06	4
50	17	CNMC89	CNMC89-3966	Adenoid	S1+	TGAAAGACACAAGCCC-06	2
51		CNMC89	CNMC89-3966	Tonsil	S1+	CGATGGCTCCACGAAT-06	1
52	18	CNMC89	CNMC89-4942	Adenoid	S1+	CTCGGGAGTGGTTTCA-06	2
53		CNMC89	CNMC89-4942	Tonsil	S1+	CTCGTCAGTCTTCTCG-06	2
54	19	CNMC89	CNMC89-5169	Adenoid	S1+	TTGGCAACATCCGTGG-06	2
55		CNMC89	CNMC89-5169	Tonsil	S1+	GCCAAATCATCCGCGA-06	10
56	20	CNMC89	CNMC89-5200	Adenoid	S1+	GTAGTCAAGCGAAGGG-06	2
57		CNMC89	CNMC89-5200	Tonsil	S1+	TACTTGTCATGGTTGT-06	4
58	21	CNMC89	CNMC89-5247	Adenoid	S1+	TGTGTTTGTTCAACCA-06	2
59		CNMC89	CNMC89-5247	Tonsil	S1+	GTGCATACATCACCCT-06	2
60	22	CNMC89	CNMC89-5725	Adenoid	S1+	ATTTCTGGTAAGTGGC-06	2
61		CNMC89	CNMC89-5725	Tonsil	S1+	TACTCGCGTCAATGTC-06	2
62	23	CNMC89	CNMC89-5926	Adenoid	S1+	GGCTCGAAGACTAGAT-06	2
63		CNMC89	CNMC89-5926	Tonsil	S1+	ACATACGAGCCCAATT-06	3
64	24	CNMC89	CNMC89-6048	Adenoid	S1+	AGCGTATGTAGCAAAT-06	3
65		CNMC89	CNMC89-6048	Tonsil	S1+	CTCACACGTTCAGTAC-06	2
66	25	CNMC89	CNMC89-6068	Adenoid	S1+	AAGGAGCAGGGTATCG-06	2
67		CNMC89	CNMC89-6068	Adenoid	S1+	CCGGTAGAGCCCAACC-06	2
68		CNMC89	CNMC89-6068	Tonsil	S1+	TACTTACCATACTCTT-06	2
69	26	CNMC89	CNMC89-6124	Adenoid	S1+	ATTCTACTCCTGTACC-06	2
70		CNMC89	CNMC89-6124	Adenoid	S1+	CGCTGGAAGAAGGGTA-06	2
71		CNMC89	CNMC89-6124	Adenoid	S1+	CTAATGGGTGGTGTAG-06	2
72		CNMC89	CNMC89-6124	Adenoid	S1+	CTACATTGTCTAACGT-06	2
73		CNMC89	CNMC89-6124	Tonsil	S1+	ACTTGTTTCTTCAACT-06	2
74	27	CNMC89	CNMC89-826	Adenoid	S1+	TTTGTCACATCGGACC-06	2
75		CNMC89	CNMC89-826	Tonsil	S1+	GGATGTTAGAAGGTGA-06	3
76	28	CNMC89	CNMC89-952	Adenoid	S1+	CCCAGTTTCATTGCCC-06	2
77		CNMC89	CNMC89-952	Adenoid	S1+	TTGCCGTAGTACGCCC-06	2
78		CNMC89	CNMC89-952	Tonsil	S1+	AACTCAGCACATAACC-06	2
79		CNMC89	CNMC89-952	Tonsil	S1+	ACGTCAAAGCGATATA-06	2
80	29	CNMC89	CNMC89-987	Adenoid	S1+	CTTAGGATCGCAAACT-06	2
81		CNMC89	CNMC89-987	Adenoid	S1+	GATCGTACACTAAGTC-06	2
82		CNMC89	CNMC89-987	Tonsil	S1+	CACACCTAGCGTCTAT-06	2
83		CNMC89	CNMC89-987	Tonsil	S1+	CGGCTAGCATGCCTAA-06	2
